# Supplementary material
Source: PubMed Central journal article supplement (PMC4136111)
Supplement: AEM.01226-14_zam999105590so1.pdf [file AEM.01226-14_zam999105590so1.pdf]

Figures and Tables for Supplementary Material

**Insects gut bacterial diversity determined by host environmental habitat, diet,  
developmental stage and phylogeny**

Ji-Hyun Yun, Seong Woon Roh, Tae Woong Whon, Mi-Ja Jung, Min-Soo Kim, Doo-Sang Park, Changmann Yoon, Young-Do Nam, Yun-Ji Kim, Jung-Hye Choi, Joon-Yong Kim, Na-Ri Shin<sup>1</sup>, Sung-Hee Kim, Won-Jae Lee & Jin-Woo Bae

\*Correspondence: J-W Bae, Department of Life and Nanopharmaceutical Sciences and Department of Biology, Kyung Hee University, Seoul 130-701, South Korea. E-mail: baejw@khu.ac.kr

**Supplementary Fig. S1.** Map showing the sampling locations of 305 insect samples (218 species belonging to 21 orders of Insecta) collected in this study. The 15 sampling sites where insects were collected are represented by the red circles. The five sites where honey bees (*Apis mellifera*) were collected to study geographical variations in the gut microbiota are represented by the open red circles. Numbers refer to the different locations described in Table S1. The map image was created in R using a personal geocache.

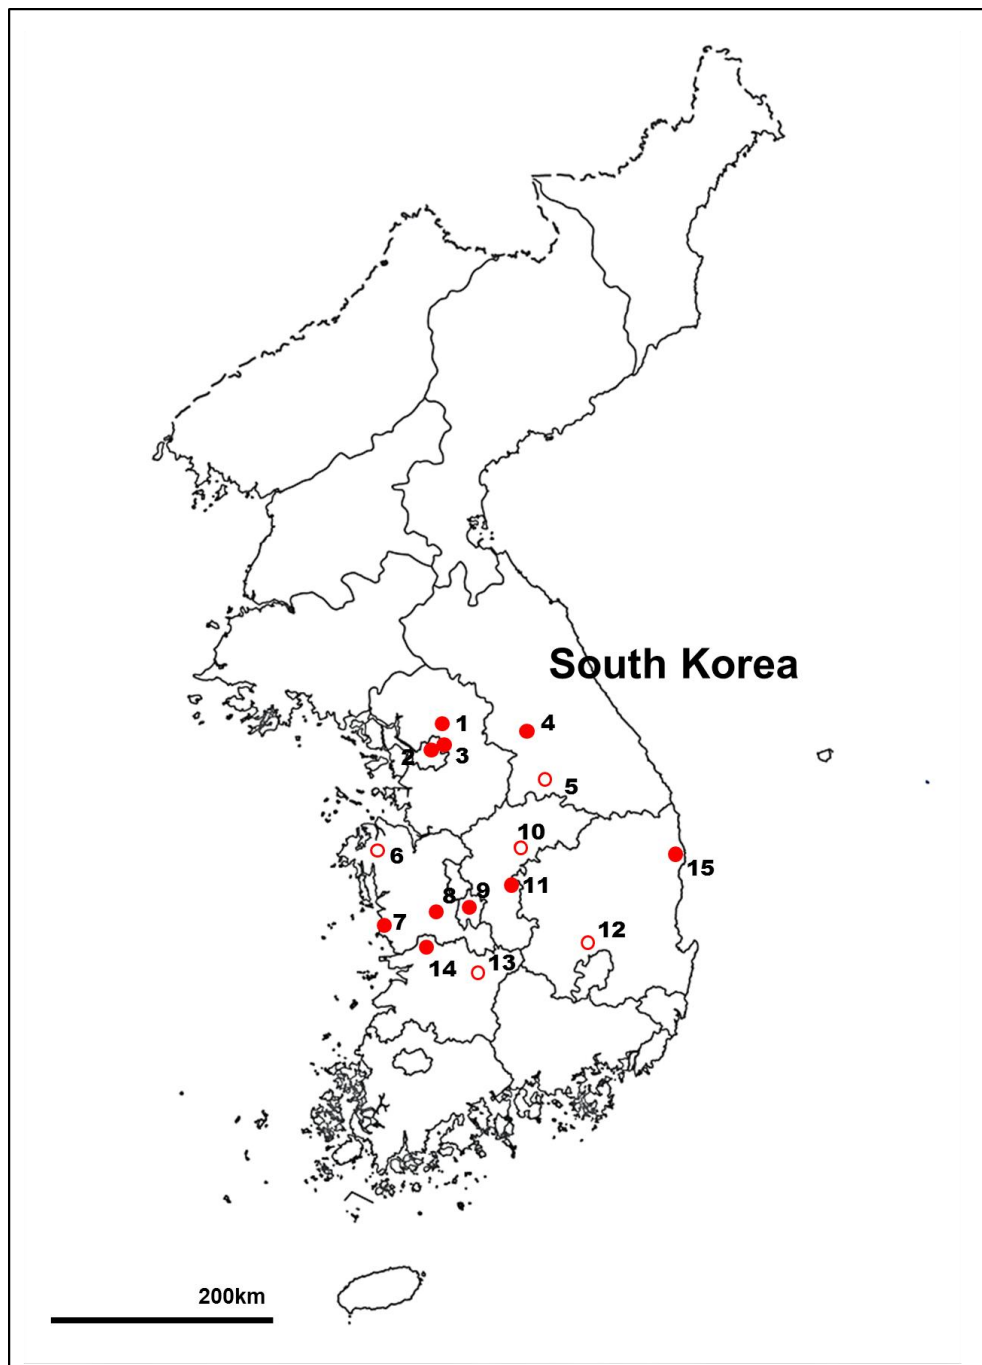

**Supplementary Fig. S2.** Summary of the composition of the insect gut microbial community from the total bacterial sequences across the 21 insect orders.

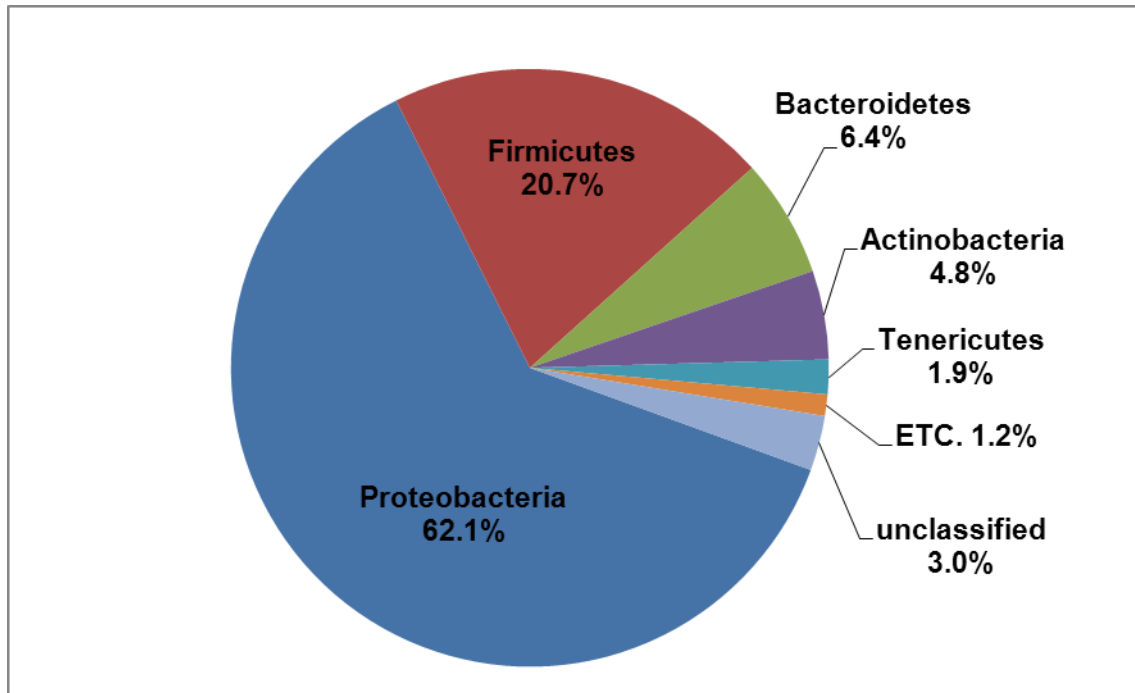

**Supplementary Fig. S3.** Rank-abundance curve for the operational taxonomic units (OTUs) (at the 3% distance level) identified in the insect gut microbiota. In the insect gut microbiota, 46% of bacterial OTUs were not observed in more than one insect sample.

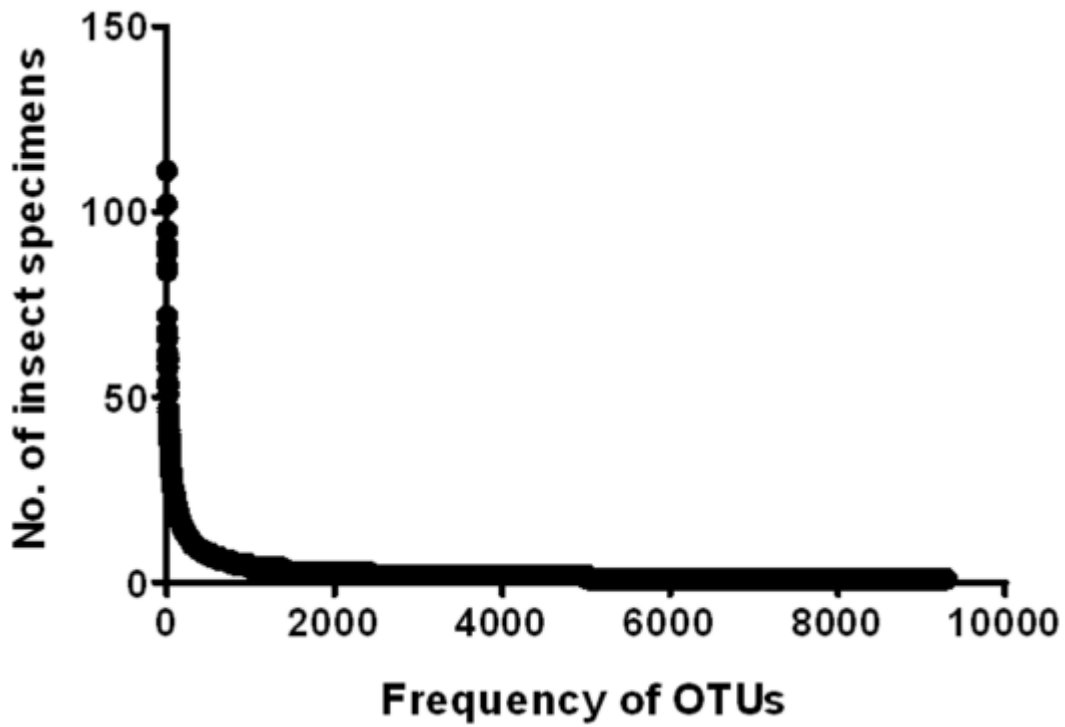

**Supplementary Fig. S4.** PCoA of bacterial communities of insect gut microbiota based on host habitat (a), host diet (b), host developmental stage (c), and phylogenetic position at the level of insect order (d). 1, Archaeognatha; 2, Thysanura; 3, Odonata; 4, Ephemeroptera; 5, Plecoptera; 6, Dermaptera; 7, Mantodea; 8, Blattaria; 9, Isoptera; 10, Phasmatodea; 11, Orthoptera; 12, Hemiptera; 13, Thysanoptera; 14, Hymenoptera; 15, Trichoptera; 16, Lepidoptera; 17, Mecoptera; 18, Neuroptera; 19, Megaloptera; 20, Coleoptera; 21, Diptera.

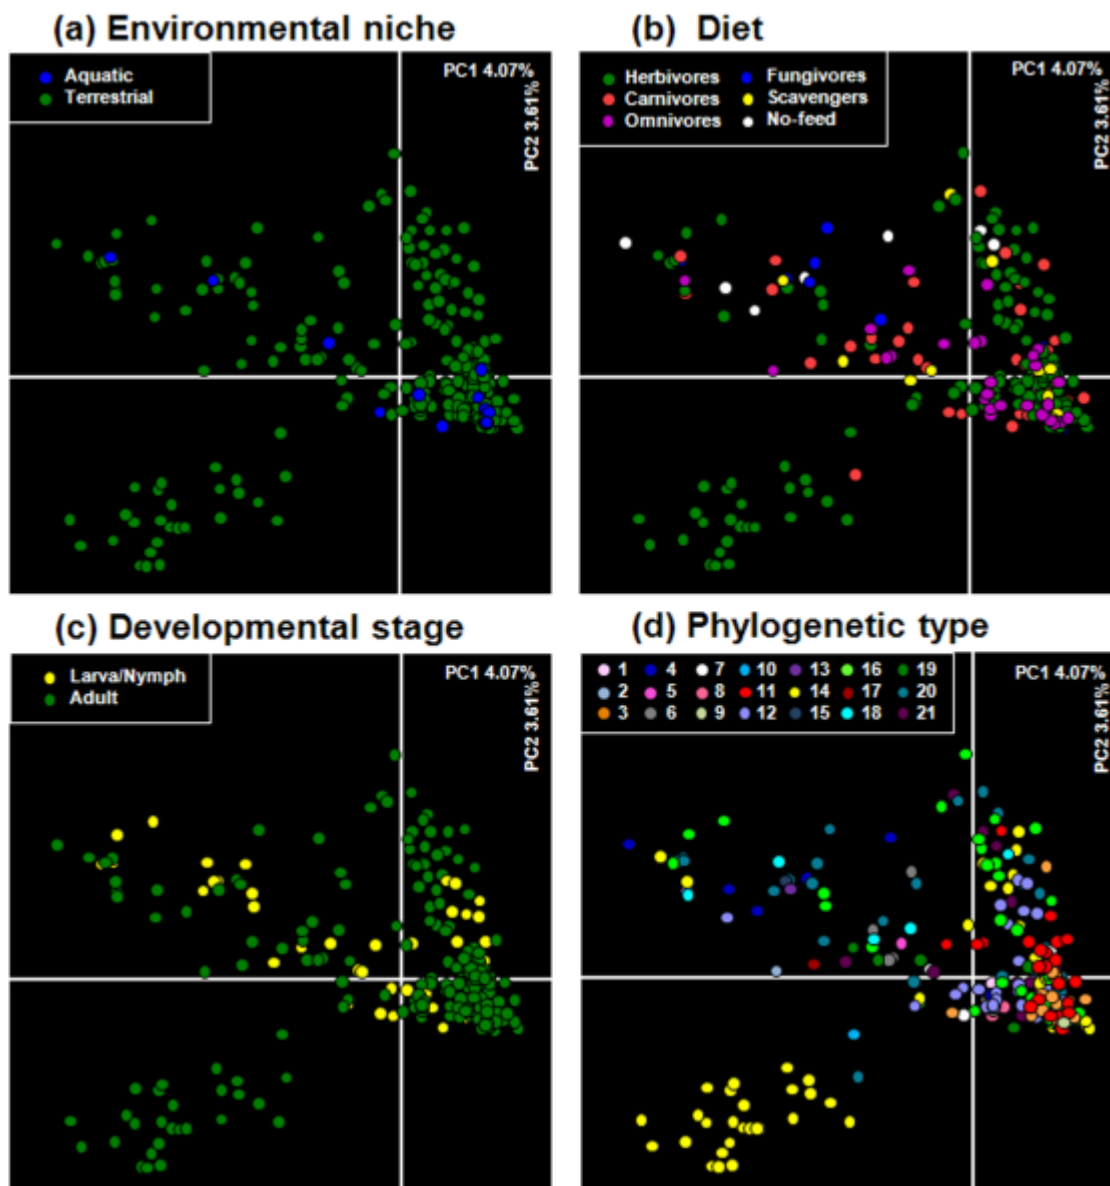

**Supplementary Table S1.** Details of 305 insect samples collected between April 2010 and March 2012 for the present study.

| Sample Name | Scientific name                              | Length (mm) | Order      | Growth level | Sampling date | Sampling site                                                                                 | Site no. in Fig. S1 | Habitat     | Diet      | Insect no. in Fig. 2 | 18S rRNA Accession no. |
|-------------|----------------------------------------------|-------------|------------|--------------|---------------|-----------------------------------------------------------------------------------------------|---------------------|-------------|-----------|----------------------|------------------------|
| DS_002      | <i>Scarites terricola pacificus</i> (Bates)  | 19-21       | Coleoptera | adult        | 21-Apr-2010   | Sohwang sand dune<br>Boryeong-si<br>Chungcheongnam-do<br>(36°12 N, 126°32 E)<br>Mount Maebong | 7                   | Underground | Carnivore | 218                  | KC413759               |
| DS_005      | <i>Mesosa myops</i> (Dalman)                 | 14-16       | Coleoptera | adult        | 27-Apr-2010   | Yuseong-gu<br>Daejeon<br>(36°22 N, 127°22 E)<br>Mount Maebong                                 | 9                   | Ground      | Herbivore | 131                  | KC413675               |
| DS_006      | <i>Moechotypa diphysis</i> (Pascoe)          | 23-25       | Coleoptera | adult        | 27-Apr-2010   | Yuseong-gu<br>Daejeon<br>(36°22 N, 127°22 E)<br>Mount Maebong                                 | 9                   | Ground      | Herbivore | 130                  | KC413666               |
| DS_022      | <i>Opatrum subaratum</i> (Faldermann)        | 8-9         | Coleoptera | adult        | 6-May-2010    | Pyeonghae-eup<br>Uljin-gun<br>Gyeongsangbuk-do<br>(36°43 N, 129°26 E)                         | 15                  | Underground | Herbivore | 125                  | KC413690               |
| DS_025      | <i>Paridea angulicollis</i> (Motschulsky)    | 5-6         | Coleoptera | adult        | 6-May-2010    | Pyeonghae-eup<br>Uljin-gun<br>Gyeongsangbuk-do<br>(36°43 N, 129°26 E)                         | 15                  | Ground      | Herbivore | 128                  | KC413694               |
| DS_048      | <i>Adoretus tenuimaculatus</i> (Aqua-house)  | 10-11       | Coleoptera | adult        | 27-May-2010   | Mount Maebong<br>Yuseong-gu<br>Daejeon<br>(36°22 N, 127°22 E)                                 | 9                   | Ground      | Herbivore | 150                  | KC413749               |
| DS_2_049    | <i>Chrysanthia integricollis</i> (Heyden)    | 7-8         | Coleoptera | adult        | 23-Jun-2010   | Sohwang sand dune<br>Boryeong-si<br>Chungcheongnam-do<br>(36°12 N, 126°32 E)                  | 7                   | Ground      | Herbivore | 129                  | KC413766               |
| DS_070      | <i>Cerogria janthinipennis</i> (Fairmaire)   | 12-13       | Coleoptera | adult        | 4-Jun-2010    | Mount Gyeryong<br>Gyeryong-si<br>Chungcheongnam-do<br>(36°20 N, 127°12 E)                     | 8                   | Ground      | Herbivore | 124                  | KC413663               |
| DS_009      | <i>Smaragdina semiaurantiaca</i> (Fairmaire) | 5-6         | Coleoptera | adult        | 6-May-2010    | Pyeonghae-eup<br>Uljin-gun<br>Gyeongsangbuk-do<br>(36°43 N, 129°26 E)                         | 15                  | Ground      | Herbivore | 126                  | KC413754               |
| DS_078      | <i>Hydaticus grammicus</i> (Germar)          | 11-12       | Coleoptera | adult        | 4-Jun-2010    | Mount Gyeryong<br>Gyeryong-si<br>Chungcheongnam-do<br>(36°20 N, 127°12 E)                     | 8                   | Aquatic     | Carnivore | 116                  | KC413755               |
| J_005       | <i>Adoretus</i> sp.                          | 8-9         | Coleoptera | adult        | 21-May-2010   | Mount Kohwang<br>Dongdaemun-Gu                                                                | 2                   | Ground      | Herbivore | 151                  | KC413818               |

|          |                                                     |       |             |       |             |                                                                                                              |    |             |           |     |          |
|----------|-----------------------------------------------------|-------|-------------|-------|-------------|--------------------------------------------------------------------------------------------------------------|----|-------------|-----------|-----|----------|
| DS_2_044 | <i>Malachius prolongatus</i><br>(Motschulsky)       | 6-7   | Coleoptera  | adult | 23-Jun-2010 | Seoul<br>(37°35 N, 127°03 E)<br>Sohwang sand dune<br>Boryeong-si<br>Chungcheongnam-do<br>(36°12 N, 126°32 E) | 7  | Ground      | Omnivore  | 122 | KC413776 |
| DS_2_048 | <i>Scarites acutidens</i><br>(Morawitz)             | 20-21 | Coleoptera  | adult | 23-Jun-2010 | Sohwang sand dune<br>Boryeong-si<br>Chungcheongnam-do<br>(36°12 N, 126°32 E)                                 | 7  | Underground | Carnivore | 217 | KC413915 |
| DS_2_050 | <i>Chlorophorus simillimus</i><br>(Kraatz)          | 12-13 | Coleoptera  | adult | 23-Jun-2010 | Sohwang sand dune<br>Boryeong-si<br>Chungcheongnam-do<br>(36°12 N, 126°32 E)                                 | 7  | Ground      | Herbivore | 137 | KC413731 |
| DS_F_013 | <i>Cryptocephalus koltzei</i><br>(Weise)            | 4-5   | Coleoptera  | adult | 22-Jun-2010 | Mount Songni<br>Boeun-gun<br>Chungcheongbuk-do<br>(36°36 N, 127°47 E)                                        | 11 | Ground      | Herbivore | 142 | KC413784 |
| DS_F_006 | <i>Gametis jucunda</i><br>(Faldermann)              | 12-13 | Coleoptera  | adult | 22-Jun-2010 | Mount Songni<br>Boeun-gun<br>Chungcheongbuk-do<br>(36°36 N, 127°47 E)                                        | 11 | Ground      | Herbivore | 146 | KC413752 |
| J_023    | <i>Blitopertha orientalis</i><br>(AquaHouse)        | 7-8   | Coleoptera  | adult | 20-Jun-2010 | Mount Maebong<br>Yuseong-gu<br>Daejeon<br>(36°22 N, 127°22 E)                                                | 9  | Ground      | Herbivore | 148 | KC413828 |
| J_038    | <i>Dorcus titanus castanicolor</i><br>(Motschulsky) | 75-80 | Coleoptera  | adult | 26-Jun-2010 | Mount Maebong<br>Yuseong-gu<br>Daejeon<br>(36°22 N, 127°22 E)                                                | 9  | Ground      | Herbivore | 133 | KC413829 |
| J_082    | <i>Moechotypa diphysis</i><br>(pascoe)              | 22-24 | Coleoptera  | adult | 2-Jul-2010  | Mount Bulam<br>Namyangju-si<br>Gyeonggi-do<br>(37°39 N, 127°5 E)                                             | 3  | Ground      | Herbivore | 130 | KC413712 |
| J_096    | <i>Peirates turpis</i><br>(Walker)                  | 13-15 | Hemiptera   | adult | 3-Jul-2010  | Soheul-eup<br>Pocheon-si<br>Gyeonggi-do<br>(37°45 N, 127°9 E)                                                | 1  | Ground      | Carnivore | 59  | KC413704 |
| J_198    | <i>Anomala luculenta</i><br>(Erichson)              | 15-16 | Coleoptera  | adult | 7-Jul-2010  | Jungnangcheon<br>Seoul<br>(37°36 N, 127°4 E)                                                                 | 2  | Ground      | Herbivore | 149 | KC413746 |
| DS_021   | <i>Polistes snelleni</i><br>(Saussure)              | 15-17 | Hymenoptera | adult | 6-May-2010  | Pyeonghae-eup<br>Uljin-gun<br>Gyeongsangbuk-do<br>(36°43 N, 129°26 E)                                        | 15 | Sky         | Herbivore | 91  | KC413747 |
| DS_038   | <i>Lasioglossum</i> sp                              | 9-10  | Hymenoptera | adult | 6-May-2010  | Pyeonghae-eup<br>Uljin-gun<br>Gyeongsangbuk-do<br>(36°43 N, 129°26 E)                                        | 15 | Sky         | Herbivore | 99  | KC413665 |

|          |                                             |       |             |       |             |                                                                            |    |        |           |     |          |
|----------|---------------------------------------------|-------|-------------|-------|-------------|----------------------------------------------------------------------------|----|--------|-----------|-----|----------|
| DS_044   | <i>Bombus ignitus</i><br>(Smith)            | 15-16 | Hymenoptera | adult | 12-May-2010 | Mount Gyeryong<br>Gyeryong-si<br>Chungcheongnam-do<br>( 36°20 N, 127°12 E) | 8  | Sky    | Herbivore | 102 | KC413667 |
| DS_043   | <i>Bombus ussutensis</i><br>(Radoszkowski)  | 14-15 | Hymenoptera | adult | 12-May-2010 | Mount Gyeryong<br>Gyeryong-si<br>Chungcheongnam-do<br>( 36°20 N, 127°12 E) | 8  | Sky    | Herbivore | 103 | KC413696 |
| DS_052   | Tryphoninae sp.                             | 17~19 | Hymenoptera | adult | 4-Jun-2010  | Mount Gyeryong<br>Gyeryong-si<br>Chungcheongnam-do<br>( 36°20 N, 127°12 E) | 8  | Sky    | Herbivore | 86  | KC413702 |
| DS_F_011 | Campopleginae sp.                           | 14-15 | Hymenoptera | adult | 22-Jun-2010 | Mount Songni<br>Boeun-gun<br>Chungcheongbuk-do<br>( 36°36 N, 127°47 E)     | 11 | Sky    | Herbivore | 84  | KC413680 |
| J_031    | <i>Apis mellifera</i><br>(Linnaeus)         | 12-13 | Hymenoptera | adult | 26-Jun-2010 | Mount Maebong<br>Yuseong-gu<br>Daejeon<br>( 36°22 N, 127°22 E)             | 9  | Sky    | Herbivore | 101 | KC413736 |
| J_089    | <i>Acroicnus ambulator</i><br>(Smith)       | 20-22 | Hymenoptera | adult | 3-Jul-2010  | Soheul-eup<br>Pocheon-si<br>Gyeonggi-do<br>( 37°45 N 127° 9 E)             | 1  | Sky    | Herbivore | 83  | KC413656 |
| J_155    | formicidae sp.                              | 9-10  | Hymenoptera | adult | 5-Jul-2010  | Mount Bulam<br>Namyangju-si<br>Gyeonggi-do<br>( 37°39 N, 127°5 E)          | 3  | Sky    | Omnivore  | 81  | KC413653 |
| J_163    | formicidae sp.                              | 9-10  | Hymenoptera | adult | 4-Jul-2010  | Mount Maebong<br>Yuseong-gu<br>Daejeon<br>( 36°22 N, 127°22 E)             | 9  | Sky    | Omnivore  | 81  | KC413701 |
| J_209    | <i>Polistes snelleni</i><br>(Saussure)      | 10-12 | Hymenoptera | adult | 7-Jul-2010  | Jungnangcheon<br>Seoul<br>( 37°36 N, 127° 4 E)                             | 2  | Sky    | Herbivore | 91  | KC413765 |
| J_165_1  | <i>Tenodera angustipennis</i><br>(Saussure) | 20-22 | Mantodea    | nymph | 4-Jul-2010  | Mount Maebong<br>Yuseong-gu<br>Daejeon<br>( 36°22 N, 127°22 E)             | 9  | Ground | Carnivore | 30  | KC413908 |
| J_228    | <i>Episyron arrogans</i><br>(Smith)         | 14-16 | Hymenoptera | adult | 8-Jul-2010  | Jungnangcheon<br>Seoul<br>( 37°36 N, 127° 4 E)                             | 2  | Sky    | Herbivore | 89  | KC413796 |
| DS_013   | <i>Papilio macilentus</i><br>(Janson)       | 47-50 | Lepidoptera | adult | 6-May-2010  | Pyeonghae-eup<br>Uljin-gun<br>Gyeongsangbuk-do<br>(36°43 N, 129°26 E)      | 15 | Sky    | Herbivore | 161 | KC413878 |
| DS_017   | <i>Sericinus montela</i><br>(Gray)          | 21-23 | Lepidoptera | adult | 6-May-2010  | Pyeonghae-eup<br>Uljin-gun<br>Gyeongsangbuk-do                             | 15 | Sky    | Herbivore | 160 | KC413855 |



|        |                                           |       |             |       |             |                                                                           |    |        |           |     |          |
|--------|-------------------------------------------|-------|-------------|-------|-------------|---------------------------------------------------------------------------|----|--------|-----------|-----|----------|
| DS_018 | <i>Lycaena phlaeas</i><br>(Linnaeus)      | 12-14 | Lepidoptera | adult | 6-May-2010  | (36°43 N, 129°26 E)<br>Pyeonghae-eup<br>Uljin-gun<br>Gyeongsangbuk-do     | 15 | Sky    | Herbivore | 192 | KC413877 |
| J_175  | <i>Minois dryas</i><br>(Scopoli)          | 23-25 | Lepidoptera | adult | 4-Jul-2010  | (36°43 N, 129°26 E)<br>Mount Maebong<br>Yuseong-gu<br>Daejeon             | 9  | Sky    | Herbivore | 170 | KC413854 |
| DS_056 | <i>Geometra dieckmanni</i><br>(Graeser)   | 20-22 | Lepidoptera | adult | 4-Jun-2010  | (36°22 N, 127°22 E)<br>Mount Gyeryong<br>Gyeryong-si<br>Chungcheongnam-do | 8  | Sky    | Herbivore | 168 | KC413869 |
| J_002  | <i>Periplaneta japonica</i><br>(Karny)    | 25-28 | Blattaria   | adult | 21-May-2010 | (36°20 N, 127°12 E)<br>Mount Kohwang<br>Dongdaemun-Gu<br>Seoul            | 2  | Ground | Omnivore  | 32  | KC413734 |
| DS_060 | <i>Sphragifera biplagiata</i><br>(Walker) | 12-14 | Lepidoptera | adult | 4-Jun-2010  | (37°35 N, 127°03 E)<br>Mount Gyeryong<br>Gyeryong-si<br>Chungcheongnam-do | 8  | Sky    | Herbivore | 179 | KC413837 |
| J_010  | <i>Arichanna melanaria</i><br>(Linnaeus)  | 16-18 | Lepidoptera | adult | 5-Jun-2010  | (36°20 N, 127°12 E)<br>Mount Bulam<br>Namyangju-si<br>Gyeonggi-do         | 3  | Sky    | Herbivore | 154 | KC413880 |
| J_111  | <i>Cystidio stratonice</i><br>(Stoll)     | 20-21 | Lepidoptera | adult | 4-Jul-2010  | (37°39 N, 127°5 E)<br>Soheul-eup<br>Pocheon-si<br>Gyeonggi-do             | 1  | Sky    | Herbivore | 172 | KC413848 |
| J_018  | <i>Japonica lutea</i><br>(Hewitson)       | 13-15 | Lepidoptera | adult | 5-Jun-2010  | (37°45 N 127° 9 E)<br>Mount Bulam<br>Namyangju-si<br>Gyeonggi-do          | 3  | Sky    | Herbivore | 158 | KC413881 |
| J_036  | <i>Everes argiades</i><br>(Pallas)        | 10-11 | Lepidoptera | adult | 26-Jun-2010 | (37°39 N, 127°5 E)<br>Mount Maebong<br>Yuseong-gu<br>Daejeon              | 9  | Sky    | Herbivore | 194 | KC413884 |
| J_133  | <i>Timandra comptaria</i><br>(Walker)     | 10-11 | Lepidoptera | adult | 4-Jul-2010  | (36°22 N, 127°22 E)<br>Soheul-eup<br>Pocheon-si<br>Gyeonggi-do            | 1  | Sky    | Herbivore | 156 | KC413866 |
| J_072  | <i>Pierris melete</i><br>(Menetries)      | 20-22 | Lepidoptera | adult | 1-Jul-2010  | (37°45 N 127° 9 E)<br>Mount Bulam<br>Namyangju-si<br>Gyeonggi-do          | 3  | Sky    | Herbivore | 181 | KC413844 |
| J_199  | <i>Glyphodes perspectalis</i><br>(Walker) | 20-22 | Lepidoptera | adult | 7-Jul-2010  | (37°39 N, 127°5 E)<br>Mount Bulam<br>Namyangju-si<br>Gyeonggi-do          | 3  | Sky    | Herbivore | 163 | KC413836 |

|          |                                            |       |             |       |             |                                                                              |    |        |           |     |          |
|----------|--------------------------------------------|-------|-------------|-------|-------------|------------------------------------------------------------------------------|----|--------|-----------|-----|----------|
| J_090    | Limacodidae sp                             | 12-13 | Lepidoptera | adult | 3-Jul-2010  | Soheul-eup<br>Pocheon-si<br>Gyeonggi-do<br>( 37°45 N 127° 9 E)               | 1  | Sky    | Herbivore | 187 | KC413859 |
| J_114    | <i>Japonica saepestriata</i><br>(Hewitson) | 13-15 | Lepidoptera | adult | 4-Jul-2010  | Soheul-eup<br>Pocheon-si<br>Gyeonggi-do<br>( 37°45 N 127° 9 E)               | 1  | Sky    | Herbivore | 157 | KC413846 |
| J_115    | <i>Naxa seriaria</i><br>(Motschulsky)      | 18-20 | Lepidoptera | adult | 4-Jul-2010  | Soheul-eup<br>Pocheon-si<br>Gyeonggi-do<br>( 37°45 N 127° 9 E)               | 1  | Sky    | Herbivore | 155 | KC413849 |
| J_121    | <i>Neptis speyeri</i><br>(Staudinger)      | 18-20 | Lepidoptera | adult | 4-Jul-2010  | Soheul-eup<br>Pocheon-si<br>Gyeonggi-do<br>( 37°45 N 127° 9 E)               | 1  | Sky    | Herbivore | 171 | KC413852 |
| J_124    | <i>Pieris canidia</i><br>(Kaolico)         | 17-19 | Lepidoptera | adult | 4-Jul-2010  | Soheul-eup<br>Pocheon-si<br>Gyeonggi-do<br>( 37°45 N 127° 9 E)               | 1  | Sky    | Herbivore | 183 | KC413847 |
| J_172    | <i>Pieris canidia</i><br>(Kaolico)         | 16-17 | Lepidoptera | adult | 4-Jul-2010  | Mount Maebong<br>Yuseong-gu<br>Daejeon<br>( 36°22 N, 127°22 E)               | 9  | Sky    | Herbivore | 183 | KC413863 |
| J_179_1  | <i>Pieris rapae</i><br>(Linnaeus)          | 16-17 | Lepidoptera | adult | 6-Jul-2010  | Mount Bulam<br>Namyangju-si<br>Gyeonggi-do<br>( 37°39 N, 127°5 E)            | 3  | Sky    | Herbivore | 188 | KC413860 |
| J_185    | <i>Polygonia c-aureum</i><br>(Linnaeus)    | 16-18 | Lepidoptera | adult | 7-Jul-2010  | Jungnangcheon<br>Seoul<br>( 37°36 N, 127° 4 E)                               | 2  | Sky    | Herbivore | 167 | KC413868 |
| J_194    | <i>Pieris rapae</i><br>(Linnaeus)          | 16-18 | Lepidoptera | adult | 7-Jul-2010  | Jungnangcheon<br>Seoul<br>( 37°36 N, 127° 4 E)                               | 2  | Sky    | Herbivore | 188 | KC413874 |
| J_195    | <i>Lycaena dispar</i><br>(Haworth)         | 13-15 | Lepidoptera | adult | 7-Jul-2010  | Jungnangcheon<br>Seoul<br>( 37°36 N, 127° 4 E)                               | 2  | Sky    | Herbivore | 159 | KC413867 |
| DS_016   | <i>Rhopalus sapporensis</i><br>(Matsumura) | 6-8   | Hemiptera   | adult | 6-May-2010  | Pyeonghae-eup<br>Uljin-gun<br>Gyeongsangbuk-do<br>(36°43 N, 129°26 E)        | 15 | Ground | Herbivore | 64  | KC413898 |
| DS_2_042 | <i>Aphrophora stictica</i><br>(Matsumura)  | 10-12 | Hemiptera   | adult | 23-Jun-2010 | Sohwang sand dune<br>Boryeong-si<br>Chungcheongnam-do<br>(36°12 N, 126°32 E) | 7  | Ground | Herbivore | 52  | KC413732 |
| J_001    | <i>Eurydema gebleri</i><br>(Kolenati)      | 8-9   | Hemiptera   | adult | 21-May-2010 | Mount Kohwang<br>Dongdaemun-Gu<br>Seoul<br>(37°35 N, 127°03 E)               | 2  | Ground | Herbivore | 69  | KC413899 |

|        |                                                           |       |             |       |             |                                                                       |    |        |           |     |          |
|--------|-----------------------------------------------------------|-------|-------------|-------|-------------|-----------------------------------------------------------------------|----|--------|-----------|-----|----------|
| J_132  | <i>Carbula putomi</i><br>(Jakovlev)                       | 8-9   | Hemiptera   | adult | 4-Jul-2010  | Soheul-eup<br>Pocheon-si<br>Gyeonggi-do<br>( 37°45 N 127° 9 E)        | 1  | Ground | Herbivore | 73  | KC413813 |
| J_134  | <i>Poecilocoris splendidulus</i><br>(Esaki)               | 18-20 | Hemiptera   | adult | 4-Jul-2010  | Soheul-eup<br>Pocheon-si<br>Gyeonggi-do<br>( 37°45 N 127° 9 E)        | 1  | Ground | Herbivore | 67  | KC413895 |
| J_167  | <i>Riptortus clavatus</i><br>(Thunberg)                   | 15-17 | Hemiptera   | adult | 4-Jul-2010  | Mount Maebong<br>Yuseong-gu<br>Daejeon<br>( 36°22 N, 127°22 E)        | 9  | Ground | Herbivore | 66  | KC413896 |
| J_212  | <i>Aquarius paludum</i><br>(Fabricius)                    | 16-17 | Hemiptera   | adult | 7-Jul-2010  | Jungnangcheon<br>Seoul<br>( 37°36 N, 127° 4 E)                        | 2  | Ground | Carnivore | 58  | KC413780 |
| DS_015 | <i>Phaenicia sericata</i><br>(Meigen)                     | 8-9   | Diptera     | adult | 6-May-2010  | Pyeonghae-eup<br>Uljin-gun<br>Gyeongsangbuk-do<br>(36°43 N, 129°26 E) | 15 | Sky    | Scavenger | 213 | KC413872 |
| J_048  | <i>Ptecticus tenebrifer</i><br>(Walker)                   | 14-15 | Diptera     | adult | 20-Jun-2010 | Mount Bulam<br>Namyangju-si<br>Gyeonggi-do<br>( 37°39 N, 127°5 E)     | 3  | Sky    | No-feed   | 206 | KC413905 |
| J_074  | <i>Phaenicia sericata</i><br>(Meigen)                     | 8-9   | Diptera     | adult | 2-Jul-2010  | Mount Bulam<br>Namyangju-si<br>Gyeonggi-do<br>( 37°39 N, 127°5 E)     | 3  | Sky    | Scavenger | 213 | KC413865 |
| J_075  | <i>Phaenicia sericata</i><br>(Meigen)                     | 8-9   | Diptera     | adult | 2-Jul-2010  | Mount Bulam<br>Namyangju-si<br>Gyeonggi-do<br>( 37°39 N, 127°5 E)     | 3  | Sky    | Scavenger | 213 | KC413918 |
| J_094  | <i>Neoitamus angusticornis</i><br>(Loew)                  | 17-18 | Diptera     | adult | 3-Jul-2010  | Soheul-eup<br>Pocheon-si<br>Gyeonggi-do<br>( 37°45 N 127° 9 E)        | 1  | Sky    | Carnivore | 203 | KC413903 |
| J_118  | <i>Anterhynchium flavomarginatum koreanum</i><br>(Yamane) | 17-19 | Hymenoptera | adult | 4-Jul-2010  | Soheul-eup<br>Pocheon-si<br>Gyeonggi-do<br>( 37°45 N 127° 9 E)        | 1  | Sky    | Herbivore | 90  | KC413695 |
| J_141  | <i>Nephrotoma virgata</i><br>(Coquillett)                 | 15-17 | Diptera     | adult | 5-Jul-2010  | Mount Kohwang<br>Dongdaemun-Gu<br>Seoul<br>(37°35 N, 127°03 E)        | 2  | Sky    | No-feed   | 197 | KC413904 |
| J_190  | <i>Cophinopoda chinensis</i><br>(Fabricius)               | 22-24 | Diptera     | adult | 7-Jul-2010  | Jungnangcheon<br>Seoul<br>( 37°36 N, 127° 4 E)                        | 2  | Sky    | Carnivore | 201 | KC413907 |
| J_230  | <i>Syrirta pipiens</i><br>(Linnaeus)                      | 7-8   | Diptera     | adult | 8-Jul-2010  | Jungnangcheon<br>Seoul<br>( 37°36 N, 127° 4 E)                        | 2  | Sky    | Herbivore | 205 | KC413906 |

|          |                                                   |       |            |       |             |                                                                              |    |        |           |    |          |
|----------|---------------------------------------------------|-------|------------|-------|-------------|------------------------------------------------------------------------------|----|--------|-----------|----|----------|
| DS_003   | <i>Labidura riparia japonica</i><br>(de Haan)     | 22-25 | Dermaptera | nymph | 21-Apr-2010 | Sohwang sand dune<br>Boryeong-si<br>Chungcheongnam-do<br>(36°12 N, 126°32 E) | 7  | Ground | Omnivore  | 23 | KC413654 |
| DS_014   | <i>Davidius lunatus</i><br>(Bartenef)             | 36-38 | Odonata    | adult | 6-May-2010  | Pyeonghae-eup<br>Uljin-gun<br>Gyeongsangbuk-do<br>(36°43 N, 129°26 E)        | 15 | Sky    | Carnivore | 9  | KC413786 |
| J_024    | <i>Sympetrum frequens</i><br>(Selys)              | 40-42 | Odonata    | adult | 23-Jun-2010 | Mount Bulam<br>Namyangju-si<br>Gyeonggi-do<br>( 37°39 N, 127°5 E)            | 3  | Sky    | Carnivore | 11 | KC413825 |
| J_025    | <i>Sympetrum infuscatum</i><br>(Selys)            | 46-50 | Odonata    | adult | 23-Jun-2010 | Mount Bulam<br>Namyangju-si<br>Gyeonggi-do<br>( 37°39 N, 127°5 E)            | 3  | Sky    | Carnivore | 12 | KC413822 |
| J_101    | <i>Platycnemis phyllopoda</i><br>(Djakonov)       | 36-38 | Odonata    | adult | 3-Jul-2010  | Soheul-eup<br>Pocheon-si<br>Gyeonggi-do<br>( 37°45 N 127° 9 E)               | 1  | Sky    | Carnivore | 3  | KC413795 |
| J_166    | <i>Plautia stali</i><br>(Scott)                   | 5-6   | Hemiptera  | nymph | 4-Jul-2010  | Mount Maebong<br>Yuseong-gu<br>Daejeon<br>( 36°22 N, 127°22 E)               | 9  | Ground | Herbivore | 68 | KC413816 |
| J_177    | <i>Sympetrum frequens</i><br>(Selys)              | 40-42 | Odonata    | adult | 4-Jul-2010  | Mount Maebong<br>Yuseong-gu<br>Daejeon<br>( 36°22 N, 127°22 E)               | 9  | Sky    | Carnivore | 11 | KC413774 |
| J_103    | <i>Calopteryx atrata</i><br>(Selys)               | 64-66 | Odonata    | adult | 4-Jul-2010  | Soheul-eup<br>Pocheon-si<br>Gyeonggi-do<br>( 37°45 N 127° 9 E)               | 1  | Sky    | Carnivore | 5  | KC413771 |
| J_204_1  | <i>Ischnura elegans</i><br>(Vander Linden)        | 34-36 | Odonata    | adult | 7-Jul-2010  | Jungnangcheon<br>Seoul<br>( 37°36 N, 127° 4 E)                               | 2  | Sky    | Carnivore | 6  | KC413851 |
| J_176    | <i>Calopteryx japonica</i><br>(Selys)             | 54-56 | Odonata    | adult | 4-Jul-2010  | Mount Maebong<br>Yuseong-gu<br>Daejeon<br>( 36°22 N, 127°22 E)               | 9  | Sky    | Carnivore | 4  | KC413781 |
| J_123    | <i>Ognevia longipennis</i><br>(Shiraki)           | 34-36 | Orthoptera | adult | 4-Jul-2010  | Soheul-eup<br>Pocheon-si<br>Gyeonggi-do<br>( 37°45 N 127° 9 E)               | 1  | Ground | Herbivore | 45 | KC413674 |
| J_126    | <i>Anapodisma beybienkoi</i><br>(Rentz et Miller) | 28-30 | Orthoptera | adult | 4-Jul-2010  | Soheul-eup<br>Pocheon-si<br>Gyeonggi-do<br>( 37°45 N 127° 9 E)               | 1  | Ground | Herbivore | 46 | KC413725 |
| DS_F_004 | <i>Anapodisma miramae</i><br>(Dovnar-Zapolskyi)   | 26-28 | Orthoptera | adult | 22-Jun-2010 | Mount Songni<br>Boeun-gun                                                    | 11 | Ground | Herbivore | 44 | KC413646 |

|          |                                                 |       |               |       |             |                                                                                                                   |    |        |           |    |          |
|----------|-------------------------------------------------|-------|---------------|-------|-------------|-------------------------------------------------------------------------------------------------------------------|----|--------|-----------|----|----------|
| DS_F_005 | <i>Tettigonia ussuriانا</i><br>(Uvarov)         | 24-26 | Orthoptera    | nymph | 22-Jun-2010 | Chungcheongbuk-do<br>(36°36 N, 127°47 E)<br>Mount Songni<br>Boeun-gun<br>Chungcheongbuk-do<br>(36°36 N, 127°47 E) | 11 | Ground | Carnivore | 37 | KC413659 |
| DS_F_016 | <i>Anapodisma miramae</i><br>(Dovnar-Zapolskyi) | 12-14 | Orthoptera    | nymph | 22-Jun-2010 | Chungcheongbuk-do<br>(36°36 N, 127°47 E)<br>Mount Songni<br>Boeun-gun<br>Chungcheongbuk-do<br>(36°36 N, 127°47 E) | 11 | Ground | Herbivore | 44 | KC413730 |
| J_026    | <i>Phaneroptera falcata</i><br>(Poda)           | 40-42 | Orthoptera    | adult | 26-Jun-2010 | Mount Maebong<br>Yuseong-gu<br>Daejeon<br>(36°22 N, 127°22 E)                                                     | 9  | Ground | Herbivore | 41 | KC413827 |
| J_030_1  | <i>Tetrix japonica</i><br>(Bolivar)             | 10-11 | Orthoptera    | adult | 26-Jun-2010 | Mount Maebong<br>Yuseong-gu<br>Daejeon<br>(36°22 N, 127°22 E)                                                     | 9  | Ground | Scavenger | 28 | KC413710 |
| J_033    | <i>Acrida cinerea</i><br>(Thunberg)             | 20-22 | Orthoptera    | nymph | 26-Jun-2010 | Mount Maebong<br>Yuseong-gu<br>Daejeon<br>(36°22 N, 127°22 E)                                                     | 9  | Ground | Herbivore | 42 | KC413737 |
| J_035_2  | <i>Conocephalus chinensis</i><br>(Redtenbacher) | 26-28 | Orthoptera    | adult | 26-Jun-2010 | Mount Maebong<br>Yuseong-gu<br>Daejeon<br>(36°22 N, 127°22 E)                                                     | 9  | Ground | Herbivore | 34 | KC413735 |
| J_044_1  | <i>Shirakiacris shirakii</i><br>(Bolivar)       | 10-11 | Orthoptera    | nymph | 20-Jun-2010 | Mount Bulam<br>Namyangju-si<br>Gyeonggi-do<br>(37°39 N, 127°5 E)                                                  | 3  | Ground | Herbivore | 43 | KC413648 |
| J_186    | <i>Acrida cinerea</i><br>(Thunberg)             | 46-48 | Orthoptera    | nymph | 7-Jul-2010  | Jungnangcheon<br>Seoul<br>(37°36 N, 127°4 E)                                                                      | 2  | Ground | Herbivore | 42 | KC413658 |
| J_061    | <i>Tetrix japonica</i><br>(Bolivar)             | 11-13 | Orthoptera    | adult | 28-Jun-2010 | Mount Bulam<br>Namyangju-si<br>Gyeonggi-do<br>(37°39 N, 127°5 E)                                                  | 3  | Ground | Scavenger | 28 | KC413717 |
| J_191    | <i>Tropidothorax cruciger</i><br>(Motschulsky)  | 10-11 | Hemiptera     | adult | 7-Jul-2010  | Jungnangcheon<br>Seoul<br>(37°36 N, 127°4 E)                                                                      | 2  | Ground | Herbivore | 65 | KC413815 |
| J_197_2  | <i>Acrida cinerea</i><br>(Thunberg)             | 38-40 | Orthoptera    | nymph | 7-Jul-2010  | Jungnangcheon<br>Seoul<br>(37°36 N, 127°4 E)                                                                      | 2  | Ground | Herbivore | 42 | KC413689 |
| DS_023   | <i>Heptagenia kihada</i><br>(Matsumura)         | 9-11  | Ephemeroptera | adult | 6-May-2010  | Pyeonghae-eup<br>Uljin-gun<br>Gyeongsangbuk-do<br>(36°43 N, 129°26 E)                                             | 15 | Sky    | No-feed   | 15 | KC413817 |
| DS_F_026 | <i>Tenodera sinensis</i><br>(Saussure)          | 20-22 | Mantodea      | nymph | 22-Jun-2010 | Mount Songni<br>Boeun-gun                                                                                         | 11 | Ground | Carnivore | 31 | KC413762 |

|        |                                                     |       |             |       |             |                                                                                                                |   |             |           |     |          |
|--------|-----------------------------------------------------|-------|-------------|-------|-------------|----------------------------------------------------------------------------------------------------------------|---|-------------|-----------|-----|----------|
| J_417  | <i>Megopis sinica</i><br>(white)                    | 45-48 | Coleoptera  | adult | 22-Jul-2010 | Chungcheongbuk-do<br>( 36°36 N, 127°47 E)<br>Mount Bulam<br>Namyangju-si<br>Gyeonggi-do<br>( 37°39 N, 127°5 E) | 3 | Ground      | Herbivore | 136 | KC413697 |
| J_388  | <i>Onthophagus sp.</i>                              | 9-10  | Coleoptera  | adult | 19-Jul-2010 | Jungnangcheon<br>Seoul<br>( 37°36 N, 127° 4 E)                                                                 | 2 | Underground | Scavenger | 143 | KC413763 |
| J_407  | <i>Tenomerga anguliscutus</i><br>(Kolbe)            | 12-13 | Coleoptera  | adult | 21-Jul-2010 | Mount Bulam<br>Namyangju-si<br>Gyeonggi-do<br>( 37°39 N, 127°5 E)                                              | 3 | Ground      | Herbivore | 115 | KC413819 |
| J_717  | <i>Pheidole fervida</i><br>(Smith)                  | 6-7   | Hymenoptera | adult | 13-Aug-2010 | Soheul-eup<br>Pocheon-si<br>Gyeonggi-do<br>( 37°45 N 127° 9 E)                                                 | 1 | Sky         | Omnivore  | 80  | KC413820 |
| J_104  | <i>Sasakia charonda</i><br>(Hewitson)               | 35-38 | Lepidoptera | adult | 4-Jul-2010  | Soheul-eup<br>Pocheon-si<br>Gyeonggi-do<br>( 37°45 N 127° 9 E)                                                 | 1 | Sky         | Herbivore | 185 | KC413856 |
| DS_073 | <i>Acanthosoma crassicaudum</i><br>(Jakovlev)       | 17-18 | Hemiptera   | adult | 4-Jun-2010  | Mount Gyeryong<br>Gyeryong-si<br>Chungcheongnam-do<br>( 36°20 N, 127°12 E)                                     | 8 | Ground      | Herbivore | 72  | KC413806 |
| DS_072 | <i>Adrisa magna</i><br>(Uhler)                      | 17-19 | Hemiptera   | adult | 4-Jun-2010  | Mount Gyeryong<br>Gyeryong-si<br>Chungcheongnam-do<br>( 36°20 N, 127°12 E)                                     | 8 | Underground | Herbivore | 71  | KC413770 |
| J_733  | <i>Meimuna mongolica</i><br>(Distant)               | 33-35 | Hemiptera   | adult | 13-Aug-2010 | Soheul-eup<br>Pocheon-si<br>Gyeonggi-do<br>( 37°45 N 127° 9 E)                                                 | 1 | Ground      | Herbivore | 57  | KC413706 |
| J_734  | <i>Graptopsaltria nigrofuscata</i><br>(Motschulsky) | 40-45 | Hemiptera   | adult | 13-Aug-2010 | Soheul-eup<br>Pocheon-si<br>Gyeonggi-do<br>( 37°45 N 127° 9 E)                                                 | 1 | Ground      | Herbivore | 56  | KC413709 |
| J_655  | <i>Oncotympana fuscata</i><br>(Distant)             | 30-32 | Hemiptera   | adult | 4-Aug-2010  | Mount Bulam<br>Namyangju-si<br>Gyeonggi-do<br>( 37°39 N, 127°5 E)                                              | 3 | Ground      | Herbivore | 55  | KC413707 |
| H_007  | <i>Crocisa emarginata</i><br>(Lepelletier)          | 15-17 | Hymenoptera | adult | 13-Jul-2010 | Mount Bulam<br>Namyangju-si<br>Gyeonggi-do<br>( 37°39 N, 127°5 E)                                              | 3 | Sky         | Herbivore | 100 | KC413812 |
| DS_049 | <i>Antipalus pedestris</i><br>(Becker)              | 20-22 | Diptera     | adult | 4-Jun-2010  | Mount Gyeryong<br>Gyeryong-si<br>Chungcheongnam-do<br>( 36°20 N, 127°12 E)                                     | 8 | Sky         | Carnivore | 202 | KC413916 |

|         |                                                        |       |               |       |             |                                                                            |   |         |           |     |          |
|---------|--------------------------------------------------------|-------|---------------|-------|-------------|----------------------------------------------------------------------------|---|---------|-----------|-----|----------|
| PYS_005 | <i>Parachauliodes continentalis</i><br>(van der Weele) | 30-31 | Megaloptera   | larva | 9-Aug-2010  | Soheul-eup<br>Pocheon-si<br>Gyeonggi-do<br>( 37°45 N 127° 9 E)             | 1 | Aquatic | Carnivore | 111 | KC413914 |
| J_642   | <i>Gryllus sibiricus</i><br>(Chopard)                  | 22-23 | Orthoptera    | nymph | 4-Aug-2010  | Mount Bulam<br>Namyangju-si<br>Gyeonggi-do<br>( 37°39 N, 127°5 E)          | 3 | Ground  | Omnivore  | 19  | KC413910 |
| J_687   | <i>Ephemera orientalis</i><br>(McLachlan)              | 17-19 | Ephemeroptera | adult | 8-Aug-2010  | Soheul-eup<br>Pocheon-si<br>Gyeonggi-do<br>( 37°45 N 127° 9 E)             | 1 | Sky     | No-feed   | 18  | KC413778 |
| J_691   | <i>Ephemera orientalis</i><br>(McLachlan)              | 13-15 | Ephemeroptera | adult | 8-Aug-2010  | Soheul-eup<br>Pocheon-si<br>Gyeonggi-do<br>( 37°45 N 127° 9 E)             | 1 | Sky     | No-feed   | 18  | KC413802 |
| PYS_004 | <i>Ephemera separigata</i><br>(Bae)                    | 20-22 | Ephemeroptera | nymph | 9-Aug-2010  | Soheul-eup<br>Pocheon-si<br>Gyeonggi-do<br>( 37°45 N 127° 9 E)             | 1 | Aquatic | Scavenger | 17  | KC413790 |
| J_335   | <i>Ephemera orientalis</i><br>(McLachlan)              | 17-19 | Ephemeroptera | adult | 14-Jul-10   | Soheul-eup<br>Pocheon-si<br>Gyeonggi-do<br>( 37°45 N 127° 9 E)             | 1 | Sky     | No-feed   | 18  | KC413809 |
| J_351   | <i>Ecdyonurus levis</i><br>(Navás)                     | 8-9   | Ephemeroptera | adult | 14-Jul-2010 | Soheul-eup<br>Pocheon-si<br>Gyeonggi-do<br>( 37°45 N 127° 9 E)             | 1 | Sky     | No-feed   | 16  | KC413823 |
| DS_115  | <i>Tenodera sinensis</i><br>(Saussure)                 | 30-32 | Mantodea      | nymph | 5-Jul-2010  | Mount Gyeryong<br>Gyeryong-si<br>Chungcheongnam-do<br>( 36°20 N, 127°12 E) | 8 | Ground  | Carnivore | 31  | KC413753 |
| J_593   | <i>Tenodera sinensis</i><br>(Saussure)                 | 43-45 | Mantodea      | nymph | 31-Jul-2010 | Soheul-eup<br>Pocheon-si<br>Gyeonggi-do<br>( 37°45 N 127° 9 E)             | 1 | Ground  | Carnivore | 31  | KC413805 |
| J_240   | <i>Chrysopa formosa</i><br>(Brauer)                    | 10-11 | Neuroptera    | adult | 8-Jul-2010  | Jungnangcheon<br>Seoul<br>( 37°36 N, 127° 4 E)                             | 2 | Sky     | Carnivore | 105 | KC413727 |
| J_548   | Osmylidae sp.                                          | 8-10  | Neuroptera    | adult | 29-Jul-2010 | Mount Bulam<br>Namyangju-si<br>Gyeonggi-do<br>( 37°39 N, 127°5 E)          | 3 | Sky     | Carnivore | 104 | KC413826 |
| J_099   | <i>Neochauliodes koreanus</i><br>(van der Weele)       | 35-38 | Megaloptera   | adult | 3-Jul-2010  | Soheul-eup<br>Pocheon-si<br>Gyeonggi-do<br>( 37°45 N 127° 9 E)             | 1 | Sky     | Carnivore | 112 | -        |
| J_753   | <i>Chrysopidia ciliata</i><br>(Wesmael)                | 9-10  | Neuroptera    | adult | 16-Sep-2010 | Mount Kohwang<br>Dongdaemun-Gu                                             | 2 | Sky     | Carnivore | 106 | KC413703 |

|          |                                         |       |               |       |             |                                                                                                |    |         |           |     |          |
|----------|-----------------------------------------|-------|---------------|-------|-------------|------------------------------------------------------------------------------------------------|----|---------|-----------|-----|----------|
| J_718    | <i>Dictyophara patruelis</i><br>(Stal)  | 9-11  | Hemiptera     | adult | 13-Aug-2010 | Seoul<br>(37°35 N, 127°03 E)<br>Soheul-eup<br>Pocheon-si<br>Gyeonggi-do<br>( 37°45 N 127° 9 E) | 1  | Ground  | Herbivore | 50  | KC413811 |
| J_744    | <i>Agrius convolvuli</i><br>(Linnaeus)  | 55-58 | Lepidoptera   | adult | 13-Aug-2010 | Soheul-eup<br>Pocheon-si<br>Gyeonggi-do<br>( 37°45 N 127° 9 E)                                 | 1  | Sky     | Herbivore | 193 | KC413882 |
| DS_024   | <i>Ecdyonurus levis</i><br>(Navas)      | 11-13 | Ephemeroptera | adult | 6-May-2010  | Pyeonghae-eup<br>Uljin-gun<br>Gyeongsangbuk-do<br>(36°43 N, 129°26 E)                          | 15 | Sky     | No-feed   | 16  | KC413814 |
| J_353    | <i>Rhantus pulverosus</i><br>(Stephens) | 12-14 | Coleoptera    | adult | 14-Jul-2010 | Soheul-eup<br>Pocheon-si<br>Gyeonggi-do<br>( 37°45 N 127° 9 E)                                 | 1  | Aquatic | Carnivore | 117 | KC413800 |
| J_003    | <i>Periplaneta japonica</i><br>(Karny)  | 24-26 | Blattaria     | adult | 21-May-2010 | Mount Kohwang<br>Dongdaemun-Gu<br>Seoul<br>(37°35 N, 127°03 E)                                 | 2  | Ground  | Omnivore  | 32  | KC413768 |
| J_504    | <i>Periplaneta japonica</i><br>(Karny)  | 13-14 | Blattaria     | nymph | 25-Jul-2010 | Mount Bulam<br>Namyangju-si<br>Gyeonggi-do<br>( 37°39 N, 127°5 E)                              | 3  | Ground  | Omnivore  | 32  | KC413794 |
| DS_2_032 | <i>Blattella nipponica</i><br>(Asahina) | 12-14 | Blattaria     | adult | 23-Jun-2010 | Sohwang sand dune<br>Boryeong-si<br>Chungcheongnam-do<br>(36°12 N, 126°32 E)                   | 7  | Ground  | Omnivore  | 33  | KC413724 |
| J_410    | <i>Anechura japonica</i><br>(Bormans)   | 18-20 | Dermaptera    | adult | 21-Jul-2010 | Mount Bulam<br>Namyangju-si<br>Gyeonggi-do<br>( 37°39 N, 127°5 E)                              | 3  | Ground  | Omnivore  | 25  | KC413722 |
| J_523    | <i>Euborellia pallipes</i><br>(Shiraki) | 23-25 | Dermaptera    | adult | 27-Jul-2010 | Hamyel-eup<br>Iksan-si<br>Chollabuk-do<br>( 36° 4 N, 126°57 E)                                 | 14 | Ground  | Omnivore  | 22  | KC413782 |
| J_563    | <i>Pterostichus</i> sp                  | 9-10  | Coleoptera    | larva | 29-Jul-2010 | Mount Bulam<br>Namyangju-si<br>Gyeonggi-do<br>( 37°39 N, 127°5 E)                              | 3  | Ground  | Carnivore | 216 | KC413723 |
| J_570    | <i>Timomenus komarovi</i><br>(Semenov)  | 22-24 | Dermaptera    | adult | 30-Jul-2010 | Soheul-eup<br>Pocheon-si<br>Gyeonggi-do<br>( 37°45 N 127° 9 E)                                 | 1  | Ground  | Omnivore  | 24  | KC413824 |
| J_156    | <i>Gonolabis marginalis</i><br>(Dohrn)  | 20-22 | Dermaptera    | adult | 5-Jul-2010  | Mount Bulam<br>Namyangju-si<br>Gyeonggi-do                                                     | 3  | Ground  | Omnivore  | 20  | KC413797 |



|           |                                                        |       |               |       |             |                                                                                               |    |             |           |     |          |
|-----------|--------------------------------------------------------|-------|---------------|-------|-------------|-----------------------------------------------------------------------------------------------|----|-------------|-----------|-----|----------|
| CH_019    | <i>Thrips palmi</i><br>(Karny)                         | 0.9-1 | Thysanoptera  | adult | 17-Jul-2010 | ( 37°39 N, 127°5 E)<br>Mount Songni<br>Boeun-gun<br>Chungcheongbuk-do<br>( 36°36 N, 127°47 E) | 11 | Sky         | Herbivore | 77  | KC413830 |
| DS_3_046  | <i>Phraortes illepidus</i><br>(Brunner von Wattenwyl)  | 80-85 | Phasmatodea   | adult | 15-Jul-2010 | Mount Gyeryong<br>Gyeryong-si<br>Chungcheongnam-do<br>( 36°20 N, 127°12 E)                    | 8  | Ground      | Herbivore | 29  | KC413821 |
| J_640     | <i>Lepisma saccharina</i><br>(Linnaeus)                | 8-9   | Thysanura     | adult | 4-Aug-2010  | Mount Bulam<br>Namyangju-si<br>Gyeonggi-do<br>( 37°39 N, 127°5 E)                             | 3  | Ground      | Omnivore  | 2   | KC413893 |
| J_396     | <i>Pedetontus</i> sp.                                  | 13-15 | Archaeognatha | adult | 21-Jul-2010 | Mount Bulam<br>Namyangju-si<br>Gyeonggi-do<br>( 37°39 N, 127°5 E)                             | 3  | Ground      | Omnivore  | 1   | KC413883 |
| PYS_001_1 | <i>Oyamia nigribasis</i><br>(Banks)                    | 27-29 | Plecoptera    | nymph | 5-Aug-2010  | Hongcheon-gun<br>Gangwon-do<br>(37°39 N, 127°53 E)                                            | 4  | Aquatic     | Carnivore | 26  | KC413889 |
| PYS_002   | <i>Hydatophylax nigrovittatus</i><br>(MacLachlan)      | 22-24 | Trichoptera   | larva | 5-Aug-2010  | Hongcheon-gun<br>Gangwon-do<br>(37°39 N, 127°53 E)                                            | 4  | Aquatic     | Scavenger | 152 | KC413777 |
| J_693     | <i>Panorpa orientalis</i><br>(McLachlan)               | 13-16 | Mecoptera     | adult | 8-Aug-2010  | Soheul-eup<br>Pocheon-si<br>Gyeonggi-do<br>( 37°45 N 127° 9 E)                                | 1  | Sky         | Carnivore | 114 | KC413779 |
| J_299     | <i>Sieboldius albardae</i><br>(Selys)                  | 27-29 | Odonata       | nymph | 10-Jul-2010 | Mount Maebong<br>Yuseong-gu<br>Daejeon<br>( 36°22 N, 127°22 E)                                | 9  | Aquatic     | Carnivore | 7   | KC413803 |
| DS_106    | <i>Grylotalpa orientalis</i><br>(Burmeister)           | 18-19 | Orthoptera    | nymph | 30-Jun-2010 | Mount Gyeryong<br>Gyeryong-si<br>Chungcheongnam-do<br>( 36°20 N, 127°12 E)                    | 8  | Underground | Omnivore  | 79  | -        |
| J_415_1   | Sarcophagidae sp.                                      | 9-10  | Diptera       | larva | 21-Jul-2010 | Mount Bulam<br>Namyangju-si<br>Gyeonggi-do<br>( 37°39 N, 127°5 E)                             | 3  | Ground      | Scavenger | 212 | KC413886 |
| J_415_2   | Sarcophagidae sp.                                      | 13-15 | Diptera       | larva | 21-Jul-2010 | Mount Bulam<br>Namyangju-si<br>Gyeonggi-do<br>( 37°39 N, 127°5 E)                             | 3  | Ground      | Scavenger | 212 | KC413887 |
| J_320     | <i>Parachauliodes continentalis</i><br>(van der Weele) | 33-35 | Megaloptera   | adult | 14-Jul-2010 | Soheul-eup<br>Pocheon-si<br>Gyeonggi-do<br>( 37°45 N 127° 9 E)                                | 1  | Sky         | Carnivore | 111 | -        |
| J_324     | <i>Protohermes grandis</i><br>(Thunberg)               | 45-47 | Megaloptera   | adult | 14-Jul-2010 | Soheul-eup<br>Pocheon-si                                                                      | 1  | Sky         | Carnivore | 113 | -        |

|        |                                           |       |             |       |             |                                                                                                         |    |             |           |     |          |
|--------|-------------------------------------------|-------|-------------|-------|-------------|---------------------------------------------------------------------------------------------------------|----|-------------|-----------|-----|----------|
| J_184  | <i>Diaphania indica</i><br>(Saunders)     | 14-16 | Lepidoptera | larva | 6-Jul-2010  | Gyeonggi-do<br>( 37°45 N 127° 9 E)<br>Mount Bulam<br>Namyangju-si<br>Gyeonggi-do<br>( 37°39 N, 127°5 E) | 3  | Ground      | Herbivore | 176 | KC413733 |
| J_385  | <i>Anisolabella marginalis</i><br>(Dohrn) | 23-24 | Dermaptera  | adult | 19-Jul-2010 | Mount Kohwang<br>Dongdaemun-Gu<br>Seoul<br>(37°35 N, 127°03 E)                                          | 2  | Ground      | Omnivore  | 21  | KC413693 |
| DS_041 | Myrmeleontidae sp.                        | 10-12 | Neuroptera  | larva | 6-May-2010  | Pyeonghae-eup<br>Uljin-gun<br>Gyeongsangbuk-do<br>(36°43 N, 129°26 E)                                   | 15 | Underground | Carnivore | 107 | KC413911 |
| J_050  | Lepidoptera sp.                           | 16-18 | Lepidoptera | larva | 20-Jun-2010 | Mount Bulam<br>Namyangju-si<br>Gyeonggi-do<br>( 37°39 N, 127°5 E)                                       | 3  | Ground      | Herbivore | 182 | KC413845 |
| J_080  | <i>Plutella xylostella</i><br>(Linnaeus)  | 16-17 | Lepidoptera | larva | 2-Jul-2010  | Mount Bulam<br>Namyangju-si<br>Gyeonggi-do<br>( 37°39 N, 127°5 E)                                       | 3  | Ground      | Herbivore | 191 | KC413876 |
| J_178  | Geometridae sp.                           | 12-13 | Lepidoptera | larva | 4-Jul-2010  | Mount Maebong<br>Yuseong-gu<br>Daejeon<br>( 36°22 N, 127°22 E)                                          | 9  | Ground      | Herbivore | 175 | KC413850 |
| J_071  | <i>Pieris rapae</i><br>(Linnaeus)         | 22-24 | Lepidoptera | larva | 1-Jul-2010  | Mount Bulam<br>Namyangju-si<br>Gyeonggi-do<br>( 37°39 N, 127°5 E)                                       | 3  | Ground      | Herbivore | 188 | KC413842 |
| J_751  | <i>Diaphania indica</i><br>(Saunders)     | 22-23 | Lepidoptera | larva | 16-Sep-2010 | Mount Kohwang<br>Dongdaemun-Gu<br>Seoul<br>(37°35 N, 127°03 E)                                          | 2  | Ground      | Herbivore | 176 | KC413879 |
| J_752  | <i>Diaphania indica</i><br>(Saunders)     | 12-14 | Lepidoptera | larva | 16-Sep-2010 | Mount Kohwang<br>Dongdaemun-Gu<br>Seoul<br>(37°35 N, 127°03 E)                                          | 2  | Ground      | Herbivore | 176 | KC413885 |
| J_745  | <i>Illeis koebelei</i><br>(Timberlake)    | 5-6   | Coleoptera  | adult | 15-Sep-2010 | Mount Kohwang<br>Dongdaemun-Gu<br>Seoul<br>(37°35 N, 127°03 E)                                          | 2  | Ground      | Fungivore | 139 | KC413833 |
| J_746  | <i>Illeis koebelei</i><br>(Timberlake)    | 5-6   | Coleoptera  | adult | 15-Sep-2010 | Mount Kohwang<br>Dongdaemun-Gu<br>Seoul<br>(37°35 N, 127°03 E)                                          | 2  | Ground      | Fungivore | 139 | KC413832 |
| J_747  | <i>Illeis koebelei</i><br>(Timberlake)    | 5-6   | Coleoptera  | adult | 15-Sep-2010 | Mount Kohwang<br>Dongdaemun-Gu<br>Seoul                                                                 | 2  | Ground      | Fungivore | 139 | KC413807 |

|        |                                        |       |            |       |             |                                                                                         |    |        |           |     |          |
|--------|----------------------------------------|-------|------------|-------|-------------|-----------------------------------------------------------------------------------------|----|--------|-----------|-----|----------|
| J_748  | <i>Illeis koebelei</i><br>(Timberlake) | 6-7   | Coleoptera | larva | 16-Sep-2010 | (37°35 N, 127°03 E)<br>Mount Kohwang<br>Dongdaemun-Gu<br>Seoul                          | 2  | Ground | Fungivore | 139 | KC413810 |
| J_749  | <i>Illeis koebelei</i><br>(Timberlake) | 6-7   | Coleoptera | larva | 16-Sep-2010 | (37°35 N, 127°03 E)<br>Mount Kohwang<br>Dongdaemun-Gu<br>Seoul                          | 2  | Ground | Fungivore | 139 | KC413785 |
| J_750  | <i>Illeis koebelei</i><br>(Timberlake) | 6-7   | Coleoptera | larva | 16-Sep-2010 | (37°35 N, 127°03 E)<br>Mount Kohwang<br>Dongdaemun-Gu<br>Seoul                          | 2  | Ground | Fungivore | 139 | KC413757 |
| DS_089 | <i>Lycorma delicatula</i><br>(White)   | 5-6   | Hemiptera  | nymph | 17-Jun-2010 | (37°35 N, 127°03 E)<br>Mount Maebong<br>Yuseong-gu<br>Daejeon                           | 9  | Ground | Herbivore | 49  | KC413750 |
| H_024  | <i>Lycorma delicatula</i><br>(White)   | 12-13 | Hemiptera  | nymph | 13-Jul-2010 | (36°22 N, 127°22 E)<br>Mount Bulam<br>Namyangju-si<br>Gyeonggi-do                       | 3  | Ground | Herbivore | 49  | KC413720 |
| EX_006 | <i>Lycorma delicatula</i><br>(White)   | 13-14 | Hemiptera  | nymph | 24-Jul-2010 | (37°39 N, 127°5 E)<br>Soheul-eup<br>Pocheon-si<br>Gyeonggi-do                           | 1  | Ground | Herbivore | 49  | KC413738 |
| J_527  | Staphylinidae sp.                      | 12-13 | Coleoptera | adult | 27-Jul-2010 | (37°45 N 127°9 E)<br>Hamyel-eup<br>Iksan-si<br>Chollabuk-do                             | 14 | Ground | Carnivore | 134 | KC413831 |
| J_668  | <i>Lycorma delicatula</i><br>(White)   | 25-26 | Hemiptera  | adult | 5-Aug-2010  | (36°4 N, 126°57 E)<br>Mount Bulam<br>Namyangju-si<br>Gyeonggi-do                        | 3  | Ground | Herbivore | 49  | KC413788 |
| J_669  | <i>Lycorma delicatula</i><br>(White)   | 25-26 | Hemiptera  | adult | 5-Aug-2010  | (37°39 N, 127°5 E)<br>Mount Bulam<br>Namyangju-si<br>Gyeonggi-do                        | 3  | Ground | Herbivore | 49  | KC413721 |
| J_754  | <i>Lycorma delicatula</i><br>(White)   | 25-26 | Hemiptera  | adult | 16-Sep-2010 | (37°39 N, 127°5 E)<br>Mount Kohwang<br>Dongdaemun-Gu<br>Seoul                           | 2  | Ground | Herbivore | 49  | KC413787 |
| J_056  | <i>Anechura japonica</i><br>(Bormans)  | 15-17 | Dermaptera | adult | 20-Jun-2010 | (37°35 N, 127°03 E)<br>Mount Kohwang<br>Dongdaemun-Gu<br>Seoul                          | 2  | Ground | Omnivore  | 25  | KC413705 |
| J_065  | <i>Timomenus komarovi</i><br>(Semenov) | 22-23 | Dermaptera | adult | 28-Jun-2010 | (37°35 N, 127°03 E)<br>Mount Bulam<br>Namyangju-si<br>Gyeonggi-do<br>(37°39 N, 127°5 E) | 3  | Ground | Omnivore  | 24  | KC413718 |

|        |                                     |       |             |       |             |                                                                |    |        |           |     |          |
|--------|-------------------------------------|-------|-------------|-------|-------------|----------------------------------------------------------------|----|--------|-----------|-----|----------|
| J_097  | Staphylinidae sp.                   | 16-18 | Coleoptera  | adult | 3-Jul-2010  | Soheul-eup<br>Pocheon-si<br>Gyeonggi-do<br>( 37°45 N 127° 9 E) | 1  | Ground | Carnivore | 121 | KC413792 |
| BSS_01 | <i>Apis mellifera</i><br>(Linnaeus) | 12-13 | Hymenoptera | adult | 27-Jul-2010 | Seosan-si<br>Chungcheongnam-do<br>( 36°50 N, 126°30 E)         | 6  | Sky    | Herbivore | 101 | KC413668 |
| BSS_02 | <i>Apis mellifera</i><br>(Linnaeus) | 12-13 | Hymenoptera | adult | 27-Jul-2010 | Seosan-si<br>Chungcheongnam-do<br>( 36°50 N, 126°30 E)         | 6  | Sky    | Herbivore | 101 | KC413688 |
| BSS_03 | <i>Apis mellifera</i><br>(Linnaeus) | 12-13 | Hymenoptera | adult | 27-Jul-2010 | Seosan-si<br>Chungcheongnam-do<br>( 36°50 N, 126°30 E)         | 6  | Sky    | Herbivore | 101 | KC413676 |
| BSS_04 | <i>Apis mellifera</i><br>(Linnaeus) | 12-13 | Hymenoptera | adult | 27-Jul-2010 | Seosan-si<br>Chungcheongnam-do<br>( 36°50 N, 126°30 E)         | 6  | Sky    | Herbivore | 101 | KC413699 |
| BSS_05 | <i>Apis mellifera</i><br>(Linnaeus) | 12-13 | Hymenoptera | adult | 27-Jul-2010 | Seosan-si<br>Chungcheongnam-do<br>( 36°50 N, 126°30 E)         | 6  | Sky    | Herbivore | 101 | KC413677 |
| BSL_01 | <i>Apis mellifera</i><br>(Linnaeus) | 12-13 | Hymenoptera | adult | 28-Jul-2010 | Sinlim<br>Wonju-si<br>Gangwon-do<br>( 37°12 N, 128° 5 E)       | 5  | Sky    | Herbivore | 101 | KC413715 |
| BSL_02 | <i>Apis mellifera</i><br>(Linnaeus) | 12-13 | Hymenoptera | adult | 28-Jul-2010 | Sinlim<br>Wonju-si<br>Gangwon-do<br>( 37°12 N, 128° 5 E)       | 5  | Sky    | Herbivore | 101 | KC413684 |
| BSL_03 | <i>Apis mellifera</i><br>(Linnaeus) | 12-13 | Hymenoptera | adult | 28-Jul-2010 | Sinlim<br>Wonju-si<br>Gangwon-do<br>( 37°12 N, 128° 5 E)       | 5  | Sky    | Herbivore | 101 | KC413669 |
| BSL_04 | <i>Apis mellifera</i><br>(Linnaeus) | 12-13 | Hymenoptera | adult | 28-Jul-2010 | Sinlim<br>Wonju-si<br>Gangwon-do<br>( 37°12 N, 128° 5 E)       | 5  | Sky    | Herbivore | 101 | KC413670 |
| BSL_05 | <i>Apis mellifera</i><br>(Linnaeus) | 12-13 | Hymenoptera | adult | 28-Jul-2010 | Sinlim<br>Wonju-si<br>Gangwon-do<br>( 37°12 N, 128° 5 E)       | 5  | Sky    | Herbivore | 101 | KC413672 |
| BKS_01 | <i>Apis mellifera</i><br>(Linnaeus) | 12-13 | Hymenoptera | adult | 10-Jun-2010 | Goesan-gun<br>Chungcheongbuk-do<br>( 36°48 N, 127°47 E)        | 10 | Sky    | Herbivore | 101 | KC413682 |
| BKS_02 | <i>Apis mellifera</i><br>(Linnaeus) | 12-13 | Hymenoptera | adult | 10-Jun-2010 | Goesan-gun<br>Chungcheongbuk-do<br>( 36°48 N, 127°47 E)        | 10 | Sky    | Herbivore | 101 | KC413686 |
| BKS_03 | <i>Apis mellifera</i><br>(Linnaeus) | 12-13 | Hymenoptera | adult | 10-Jun-2010 | Goesan-gun<br>Chungcheongbuk-do<br>( 36°48 N, 127°47 E)        | 10 | Sky    | Herbivore | 101 | KC413683 |
| BKS_04 | <i>Apis mellifera</i>               | 12-13 | Hymenoptera | adult | 10-Jun-     | Goesan-gun                                                     | 10 | Sky    | Herbivore | 101 | KC413716 |

|          |                                     |       |             |       |             |                                                                           |    |             |           |     |          |  |
|----------|-------------------------------------|-------|-------------|-------|-------------|---------------------------------------------------------------------------|----|-------------|-----------|-----|----------|--|
|          | (Linnaeus)                          |       |             |       | 2010        | Chungcheongbuk-do<br>(36°48 N, 127°47 E)                                  |    |             |           |     |          |  |
| BKS_05   | <i>Apis mellifera</i><br>(Linnaeus) | 12-13 | Hymenoptera | adult | 10-Jun-2010 | Goesan-gun<br>Chungcheongbuk-do<br>(36°48 N, 127°47 E)                    | 10 | Sky         | Herbivore | 101 | KC413678 |  |
| BJA_01   | <i>Apis mellifera</i><br>(Linnaeus) | 12-13 | Hymenoptera | adult | 28-Jul-2010 | Jinan-gun<br>Jeollabuk-do<br>(35°47 N, 127°25 E)                          | 13 | Sky         | Herbivore | 101 | KC413713 |  |
| BJA_02   | <i>Apis mellifera</i><br>(Linnaeus) | 12-13 | Hymenoptera | adult | 28-Jul-2010 | Jinan-gun<br>Jeollabuk-do<br>(35°47 N, 127°25 E)                          | 13 | Sky         | Herbivore | 101 | KC413671 |  |
| BJA_03   | <i>Apis mellifera</i><br>(Linnaeus) | 12-13 | Hymenoptera | adult | 28-Jul-2010 | Jinan-gun<br>Jeollabuk-do<br>(35°47 N, 127°25 E)                          | 13 | Sky         | Herbivore | 101 | KC413681 |  |
| BJA_04   | <i>Apis mellifera</i><br>(Linnaeus) | 12-13 | Hymenoptera | adult | 28-Jul-2010 | Jinan-gun<br>Jeollabuk-do<br>(35°47 N, 127°25 E)                          | 13 | Sky         | Herbivore | 101 | KC413687 |  |
| BJA_05   | <i>Apis mellifera</i><br>(Linnaeus) | 12-13 | Hymenoptera | adult | 28-Jul-2010 | Jinan-gun<br>Jeollabuk-do<br>(35°47 N, 127°25 E)                          | 13 | Sky         | Herbivore | 101 | KC413679 |  |
| BGS_01   | <i>Apis mellifera</i><br>(Linnaeus) | 12-13 | Hymenoptera | adult | 28-Jul-2010 | Mount Ga<br>Chilgok-gun<br>Gyeongsangbuk-do<br>(36° 3 N, 128°39 E)        | 12 | Sky         | Herbivore | 101 | KC413714 |  |
| BGS_02   | <i>Apis mellifera</i><br>(Linnaeus) | 12-13 | Hymenoptera | adult | 28-Jul-2010 | Mount Ga<br>Chilgok-gun<br>Gyeongsangbuk-do<br>(36° 3 N, 128°39 E)        | 12 | Sky         | Herbivore | 101 | KC413698 |  |
| BGS_03   | <i>Apis mellifera</i><br>(Linnaeus) | 12-13 | Hymenoptera | adult | 28-Jul-2010 | Mount Ga<br>Chilgok-gun<br>Gyeongsangbuk-do<br>(36° 3 N, 128°39 E)        | 12 | Sky         | Herbivore | 101 | KC413692 |  |
| BGS_04   | <i>Apis mellifera</i><br>(Linnaeus) | 12-13 | Hymenoptera | adult | 28-Jul-2010 | Mount Ga<br>Chilgok-gun<br>Gyeongsangbuk-do<br>(36° 3 N, 128°39 E)        | 12 | Sky         | Herbivore | 101 | KC413691 |  |
| BGS_05   | <i>Apis mellifera</i><br>(Linnaeus) | 12-13 | Hymenoptera | adult | 28-Jul-2010 | Mount Ga<br>Chilgok-gun<br>Gyeongsangbuk-do<br>(36° 3 N, 128°39 E)        | 12 | Sky         | Herbivore | 101 | KC413685 |  |
| CH_015   | <i>Isoptera</i> sp.                 | 3-4   | Isoptera    | adult | 17-Jul-2010 | Mount Songni<br>Boeun-gun<br>Chungcheongbuk-do<br>(36°36 N, 127°47 E)     | 11 | Underground | Herbivore | 48  | KC413739 |  |
| DS_3_005 | <i>Isodontia nigella</i><br>(Smith) | 18-20 | Hymenoptera | adult | 15-Jul-2010 | Mount Gyeryong<br>Gyeryong-si<br>Chungcheongnam-do<br>(36°20 N, 127°12 E) | 8  | Sky         | Herbivore | 92  | KC413657 |  |
| J_705    | <i>Onthophagus</i> sp.              | 9-10  | Coleoptera  | adult | 13-Aug-     | Soheul-eup                                                                | 1  | Underground | Scavenge  | 145 | KC413742 |  |

|            |                                                      |       |             |       |             |                                                                            |   |                 |           |     |          |
|------------|------------------------------------------------------|-------|-------------|-------|-------------|----------------------------------------------------------------------------|---|-----------------|-----------|-----|----------|
|            |                                                      |       |             |       | 2010        | Pocheon-si<br>Gyeonggi-do<br>( 37°45 N 127° 9 E)<br>Mount Gyeryong         |   |                 | r         |     |          |
| DS_3_008   | <i>Sphex occitanicus</i><br>(Lepeletier et Serville) | 28-30 | Hymenoptera | adult | 15-Jul-2010 | Gyeryong-si<br>Chungcheongnam-do<br>( 36°20 N, 127°12 E)<br>Mount Gyeryong | 8 | Sky             | Herbivore | 94  | KC413745 |
| DS_3_011   | <i>Trichius succinctus</i><br>(Pallas)               | 10-12 | Coleoptera  | adult | 15-Jul-2010 | Gyeryong-si<br>Chungcheongnam-do<br>( 36°20 N, 127°12 E)<br>Mount Gyeryong | 8 | Ground          | Herbivore | 147 | KC413660 |
| DS_3_034   | <i>Harmonia axyridis</i><br>(Pallas)                 | 8-9   | Coleoptera  | adult | 15-Jul-2010 | Gyeryong-si<br>Chungcheongnam-do<br>( 36°20 N, 127°12 E)<br>Mount Gyeryong | 8 | Ground          | Carnivore | 138 | KC413764 |
| DS_3_038   | <i>Prionus insularis</i><br>(Motschulsky)            | 25-28 | Coleoptera  | adult | 15-Jul-2010 | Gyeryong-si<br>Chungcheongnam-do<br>( 36°20 N, 127°12 E)<br>Mount Gyeryong | 8 | Ground          | Herbivore | 135 | KC413652 |
| DS_3_058_2 | Diptera sp.                                          | 9-10  | Diptera     | larva | 15-Jul-2010 | Gyeryong-si<br>Chungcheongnam-do<br>( 36°20 N, 127°12 E)<br>Mount Gyeryong | 8 | Host-associated | Carnivore | 215 | KC413862 |
| DS_3_075   | <i>Atrophaneura alcinous</i><br>(Klug)               | 28-30 | Lepidoptera | adult | 15-Jul-2010 | Gyeryong-si<br>Chungcheongnam-do<br>( 36°20 N, 127°12 E)<br>Mount Bulam    | 8 | Sky             | Herbivore | 162 | KC413838 |
| J_395      | <i>Acanthonevra amurensis</i><br>(Portschinsky)      | 7-9   | Diptera     | adult | 21-Jul-2010 | Namyangju-si<br>Gyeonggi-do<br>( 37°39 N, 127°5 E)<br>Mount Bulam          | 3 | Sky             | Herbivore | 209 | KC413861 |
| J_425      | <i>Atlanticus brunneri</i><br>(Pylnov)               | 31-32 | Orthoptera  | adult | 22-Jul-2010 | Namyangju-si<br>Gyeonggi-do<br>( 37°39 N, 127°5 E)<br>Jungnangcheon        | 3 | Ground          | Carnivore | 36  | KC413719 |
| J_226      | <i>Aelia fieberi</i><br>(Scott)                      | 5-6   | Hemiptera   | nymph | 8-Jul-2010  | Seoul<br>( 37°36 N, 127° 4 E)                                              | 2 | Ground          | Herbivore | 75  | -        |
| J_450      | <i>Seladonia aeraria</i><br>(Smith)                  | 10-12 | Hymenoptera | adult | 22-Jul-2010 | Mount Bulam<br>Namyangju-si<br>Gyeonggi-do<br>( 37°39 N, 127°5 E)          | 3 | Sky             | Herbivore | 98  | KC413661 |
| J_453      | <i>Lema fortunei</i><br>(Baly)                       | 7-8   | Coleoptera  | adult | 22-Jul-2010 | Mount Bulam<br>Namyangju-si<br>Gyeonggi-do<br>( 37°39 N, 127°5 E)          | 3 | Ground          | Herbivore | 123 | KC413651 |
| J_722      | Chironomidae sp.                                     | 6-7   | Diptera     | adult | 13-Aug-2010 | Soheul-eup<br>Pocheon-si<br>Gyeonggi-do                                    | 1 | Sky             | No-feed   | 198 | KC413919 |

|         |                                                                  |       |             |       |             |                                                                   |   |        |           |     |          |
|---------|------------------------------------------------------------------|-------|-------------|-------|-------------|-------------------------------------------------------------------|---|--------|-----------|-----|----------|
| J_461   | Tephritidae sp.                                                  | 18-20 | Diptera     | adult | 24-Jul-2010 | ( 37°45 N 127° 9 E)<br>Soheul-eup<br>Pocheon-si<br>Gyeonggi-do    | 1 | Sky    | Herbivore | 210 | KC413891 |
| J_463   | <i>Sinomphisa plagialis</i><br>(Wileman)                         | 16-18 | Lepidoptera | adult | 24-Jul-2010 | ( 37°45 N 127° 9 E)<br>Soheul-eup<br>Pocheon-si<br>Gyeonggi-do    | 1 | Sky    | Herbivore | 165 | KC413840 |
| J_466   | <i>Toxorhynchites christophi</i><br>(Portschinsky)               | 16-18 | Diptera     | adult | 24-Jul-2010 | ( 37°45 N 127° 9 E)<br>Soheul-eup<br>Pocheon-si<br>Gyeonggi-do    | 1 | Sky    | Herbivore | 199 | KC413902 |
| J_475_1 | <i>Lamelligomphus ringens</i><br>(Needham)                       | 62-62 | Odonata     | adult | 24-Jul-2010 | ( 37°45 N 127° 9 E)<br>Soheul-eup<br>Pocheon-si<br>Gyeonggi-do    | 1 | Sky    | Carnivore | 14  | KC413760 |
| J_558   | Systropodinae sp.                                                | 14-16 | Diptera     | adult | 29-Jul-2010 | Mount Bulam<br>Namyangju-si<br>Gyeonggi-do<br>( 37°39 N, 127°5 E) | 3 | Sky    | Herbivore | 204 | KC413789 |
| J_571   | <i>Chalicodoma sculpturalis</i><br>(Smith)                       | 24-26 | Hymenoptera | adult | 31-Jul-2010 | ( 37°45 N 127° 9 E)<br>Soheul-eup<br>Pocheon-si<br>Gyeonggi-do    | 1 | Sky    | Herbivore | 96  | KC413761 |
| J_574   | <i>Coptolabrus jankowskii</i><br><i>jankowskii</i><br>(Oberthur) | 38-40 | Coleoptera  | adult | 31-Jul-2010 | ( 37°45 N 127° 9 E)<br>Soheul-eup<br>Pocheon-si<br>Gyeonggi-do    | 1 | Ground | Carnivore | 118 | KC413741 |
| J_576   | <i>Melypteryx fuliginosa</i><br>(Uhler)                          | 18-19 | Hemiptera   | nymph | 31-Jul-2010 | ( 37°45 N 127° 9 E)<br>Soheul-eup<br>Pocheon-si<br>Gyeonggi-do    | 1 | Ground | Herbivore | 62  | KC413767 |
| J_581   | <i>Megachile pieliana</i><br>(Friese)                            | 10-11 | Hymenoptera | adult | 31-Jul-2010 | ( 37°45 N 127° 9 E)<br>Soheul-eup<br>Pocheon-si<br>Gyeonggi-do    | 1 | Sky    | Herbivore | 95  | KC413751 |
| J_595   | <i>Zombrus sjoestedtis</i><br>(Fahringier)                       | 10-11 | Hymenoptera | adult | 31-Jul-2010 | ( 37°45 N 127° 9 E)<br>Soheul-eup<br>Pocheon-si<br>Gyeonggi-do    | 1 | Sky    | Herbivore | 87  | KC413655 |
| J_598   | <i>Graptopsaltria nigrofuscata</i><br>(Motschulsky)              | 38-40 | Hemiptera   | adult | 31-Jul-2010 | ( 37°45 N 127° 9 E)<br>Soheul-eup<br>Pocheon-si<br>Gyeonggi-do    | 1 | Ground | Herbivore | 56  | KC413758 |
| J_600   | <i>Oncotympana fuscata</i><br>(Distant)                          | 35-36 | Hemiptera   | adult | 31-Jul-2010 | ( 37°45 N 127° 9 E)<br>Soheul-eup<br>Pocheon-si<br>Gyeonggi-do    | 1 | Ground | Herbivore | 55  | KC413673 |

|         |                                                    |       |             |       |             |                                                                   |    |        |           |     |          |
|---------|----------------------------------------------------|-------|-------------|-------|-------------|-------------------------------------------------------------------|----|--------|-----------|-----|----------|
| J_625   | <i>Sceliphron deforme</i><br>(Smith)               | 17-20 | Hymenoptera | adult | 1-Aug-2010  | Soheul-eup<br>Pocheon-si<br>Gyeonggi-do<br>( 37°45 N 127° 9 E)    | 1  | Sky    | Herbivore | 93  | KC413748 |
| J_633   | <i>Epicopeia menciata</i><br>(Moore)               | 23-25 | Lepidoptera | adult | 1-Aug-2010  | Soheul-eup<br>Pocheon-si<br>Gyeonggi-do<br>( 37°45 N 127° 9 E)    | 1  | Sky    | Herbivore | 173 | KC413843 |
| J_673   | <i>Marumba gaschkewitschii</i><br>(Bremer)         | 60-63 | Lepidoptera | larva | 8-Aug-2010  | Soheul-eup<br>Pocheon-si<br>Gyeonggi-do<br>( 37°45 N 127° 9 E)    | 1  | Ground | Herbivore | 180 | KC413841 |
| J_695   | <i>Pheidole fervida</i><br>(Smith)                 | 5-6   | Hymenoptera | adult | 8-Aug-2010  | Soheul-eup<br>Pocheon-si<br>Gyeonggi-do<br>( 37°45 N 127° 9 E)    | 1  | Sky    | Omnivore  | 80  | KC413650 |
| J_701   | <i>Paradacus depressus</i><br>(Shiraki)            | 14-15 | Diptera     | adult | 8-Aug-2010  | Soheul-eup<br>Pocheon-si<br>Gyeonggi-do<br>( 37°45 N 127° 9 E)    | 1  | Sky    | Herbivore | 208 | KC413890 |
| J_706   | <i>Orybina regalis</i><br>(Leech)                  | 12-13 | Lepidoptera | adult | 13-Aug-2010 | Soheul-eup<br>Pocheon-si<br>Gyeonggi-do<br>( 37°45 N 127° 9 E)    | 1  | Sky    | Herbivore | 178 | KC413835 |
| J_728   | <i>Comibaena delicatior</i><br>(Warren)            | 11-12 | Lepidoptera | adult | 13-Aug-2010 | Soheul-eup<br>Pocheon-si<br>Gyeonggi-do<br>( 37°45 N 127° 9 E)    | 1  | Sky    | Herbivore | 174 | KC413839 |
| J_737   | <i>Odonestis pruni</i><br>(Linnaeus)               | 18-19 | Lepidoptera | adult | 13-Aug-2010 | Soheul-eup<br>Pocheon-si<br>Gyeonggi-do<br>( 37°45 N 127° 9 E)    | 1  | Sky    | Herbivore | 164 | KC413834 |
| J_357_1 | <i>Chilocorus rubidus</i><br>(Hope)                | 5-6   | Coleoptera  | adult | 18-Jul-2010 | Mount Kohwang<br>Dongdaemun-Gu<br>Seoul<br>(37°35 N, 127°03 E)    | 2  | Ground | Carnivore | 141 | KC413773 |
| J_317   | <i>Callambulyx tatarinovii</i><br>(Bremer et Grey) | 33-35 | Lepidoptera | adult | 14-Jul-2010 | Soheul-eup<br>Pocheon-si<br>Gyeonggi-do<br>( 37°45 N 127° 9 E)    | 1  | Sky    | Herbivore | 186 | KC413858 |
| J_421   | <i>Peirates turpis</i><br>(Walker)                 | 14-15 | Hemiptera   | adult | 22-Jul-2010 | Mount Bulam<br>Namyangju-si<br>Gyeonggi-do<br>( 37°39 N, 127°5 E) | 3  | Ground | Carnivore | 59  | KC413804 |
| J_529   | <i>Rhagastis mongoliana</i><br>(Butler)            | 30-35 | Lepidoptera | adult | 28-Jul-2010 | Jinan-gun<br>Jeollabuk-do                                         | 13 | Sky    | Herbivore | 177 | KC413909 |



|       |                                                |       |             |       |             |                                                                 |   |             |           |     |          |
|-------|------------------------------------------------|-------|-------------|-------|-------------|-----------------------------------------------------------------|---|-------------|-----------|-----|----------|
| J_573 | <i>Numenes disparilis</i><br>(Staudinger)      | 19-20 | Lepidoptera | adult | 31-Jul-2010 | ( 35°47 N, 127°25 E)<br>Soheul-eup<br>Pocheon-si<br>Gyeonggi-do | 1 | Sky         | Herbivore | 184 | KC413853 |
| J_578 | <i>Paratlanticus ussuriensis</i><br>(Uvarov)   | 30-32 | Orthoptera  | adult | 31-Jul-2010 | ( 37°45 N 127° 9 E)<br>Soheul-eup<br>Pocheon-si<br>Gyeonggi-do  | 1 | Ground      | Omnivore  | 35  | KC413649 |
| J_580 | <i>Syritta pipiens</i><br>(Linnaeus)           | 10-11 | Diptera     | adult | 31-Jul-2010 | ( 37°45 N 127° 9 E)<br>Soheul-eup<br>Pocheon-si<br>Gyeonggi-do  | 1 | Sky         | Herbivore | 205 | KC413892 |
| J_624 | <i>Anoplophora malasiaca</i><br>(Thamson)      | 34-36 | Coleoptera  | adult | 1-Aug-2010  | Mount Bulam<br>Namyangju-si<br>Gyeonggi-do                      | 3 | Ground      | Herbivore | 132 | KC413801 |
| J_630 | <i>Silpha perforata</i><br>(Gebler)            | 17-19 | Coleoptera  | adult | 1-Aug-2010  | ( 37°39 N, 127°5 E)<br>Soheul-eup<br>Pocheon-si<br>Gyeonggi-do  | 1 | Ground      | Carnivore | 120 | KC413808 |
| J_658 | Torymidae sp                                   | 5-6   | Hymenoptera | adult | 5-Aug-2010  | Mount Bulam<br>Namyangju-si<br>Gyeonggi-do                      | 3 | Sky         | Herbivore | 88  | KC413647 |
| J_239 | <i>Seladonia aeraria</i><br>(Smith)            | 6-7   | Hymenoptera | adult | 8-Jul-2010  | ( 37°36 N, 127° 4 E)<br>Jungnangcheon<br>Seoul                  | 2 | Sky         | Herbivore | 98  | KC413728 |
| J_244 | <i>Coccinella septempunctata</i><br>(Linnaeus) | 6-7   | Coleoptera  | adult | 8-Jul-2010  | ( 37°36 N, 127° 4 E)<br>Jungnangcheon<br>Seoul                  | 2 | Ground      | Carnivore | 140 | KC413793 |
| J_254 | <i>Athalia kashmirensis</i><br>(Bensen)        | 7-8   | Hymenoptera | adult | 8-Jul-2010  | ( 37°36 N, 127° 4 E)<br>Jungnangcheon<br>Seoul                  | 2 | Sky         | Herbivore | 78  | KC413744 |
| J_277 | <i>Actias gnoma</i><br>(Butler)                | 26-28 | Lepidoptera | adult | 10-Jul-2010 | ( 37°45 N 127° 9 E)<br>Soheul-eup<br>Pocheon-si<br>Gyeonggi-do  | 1 | Sky         | Herbivore | 169 | KC413857 |
| J_278 | <i>Ledra auditura</i><br>(Walker)              | 14-15 | Hemiptera   | adult | 10-Jul-2010 | ( 37°45 N 127° 9 E)<br>Soheul-eup<br>Pocheon-si<br>Gyeonggi-do  | 1 | Ground      | Herbivore | 54  | KC413783 |
| J_279 | <i>Tachina luteola</i><br>(Coquillett)         | 22-24 | Diptera     | adult | 10-Jul-2010 | ( 37°45 N 127° 9 E)<br>Soheul-eup<br>Pocheon-si<br>Gyeonggi-do  | 1 | Sky         | Herbivore | 214 | KC413864 |
| J_286 | <i>Formica japonica</i><br>(Motschulsky)       | 8-9   | Hymenoptera | adult | 10-Jul-2010 | Soheul-eup<br>Pocheon-si<br>Gyeonggi-do                         | 1 | Underground | Omnivore  | 82  | KC413662 |

|            |                                              |       |             |       |             |                                                                            |    |        |           |     |          |
|------------|----------------------------------------------|-------|-------------|-------|-------------|----------------------------------------------------------------------------|----|--------|-----------|-----|----------|
| J_306      | Tachinidae sp.                               | 7-8   | Diptera     | adult | 12-Jul-2010 | ( 37°45 N 127° 9 E)<br>Mount Bulam<br>Namyangju-si<br>Gyeonggi-do          | 3  | Sky    | Herbivore | 207 | KC413870 |
| J_343      | <i>Rhodoneura erecta</i><br>(Leech)          | 7-8   | Lepidoptera | adult | 14-Jul-2010 | ( 37°39 N, 127°5 E)<br>Soheul-eup<br>Pocheon-si<br>Gyeonggi-do             | 1  | Sky    | Herbivore | 166 | KC413871 |
| J_344      | Tiphiidae sp.                                | 7-8   | Hymenoptera | adult | 14-Jul-2010 | ( 37°45 N 127° 9 E)<br>Soheul-eup<br>Pocheon-si<br>Gyeonggi-do             | 1  | Sky    | Herbivore | 97  | KC413769 |
| J_368      | <i>Oedaleus infernalis</i><br>(Saussure)     | 17-18 | Orthoptera  | nymph | 18-Jul-2010 | ( 37°45 N 127° 9 E)<br>Mount Bulam<br>Namyangju-si<br>Gyeonggi-do          | 3  | Ground | Herbivore | 47  | KC413743 |
| J_369      | <i>Peirates turpis</i><br>(Walker)           | 15-16 | Hemiptera   | adult | 18-Jul-2010 | ( 37°39 N, 127°5 E)<br>Mount Bulam<br>Namyangju-si<br>Gyeonggi-do          | 3  | Ground | Carnivore | 59  | KC413894 |
| DS_065     | <i>Phillosphingia dissimilis</i><br>(Bremer) | 40-42 | Lepidoptera | adult | 4-Jun-2010  | Mount Gyeryong<br>Gyeryong-si<br>Chungcheongnam-do<br>( 36°20 N, 127°12 E) | 8  | Sky    | Herbivore | 189 | KC413873 |
| DS_F_023   | Ichneumonidae sp.                            | 13-14 | Hymenoptera | adult | 22-Jun-2010 | Mount Songni<br>Boeun-gun<br>Chungcheongbuk-do<br>( 36°36 N, 127°47 E)     | 11 | Sky    | Herbivore | 85  | KC413664 |
| DS_F_003   | <i>Bothrogonia japonica</i><br>(Ishihara)    | 13-14 | Hemiptera   | adult | 22-Jun-2010 | Mount Songni<br>Boeun-gun<br>Chungcheongbuk-do<br>( 36°36 N, 127°47 E)     | 11 | Ground | Herbivore | 53  | KC413772 |
| DS_3_014   | <i>Hybris subjacens</i><br>(Walker)          | 33-35 | Neuroptera  | adult | 15-Jul-2010 | Mount Gyeryong<br>Gyeryong-si<br>Chungcheongnam-do<br>( 36°20 N, 127°12 E) | 8  | Sky    | Carnivore | 109 | KC413913 |
| DS_3_058_1 | <i>Dalpada cinctipes</i><br>(Walker)         | 16-17 | Hemiptera   | adult | 15-Jul-2010 | Mount Gyeryong<br>Gyeryong-si<br>Chungcheongnam-do<br>( 36°20 N, 127°12 E) | 8  | Ground | Herbivore | 70  | KC413756 |
| J_402      | <i>Zoraida horishana</i><br>(Matsumura)      | 5-6   | Hemiptera   | adult | 21-Jul-2010 | Mount Bulam<br>Namyangju-si<br>Gyeonggi-do<br>( 37°39 N, 127°5 E)          | 3  | Sky    | Herbivore | 51  | KC413888 |
| J_403      | Systropodinae sp.                            | 12-13 | Diptera     | adult | 21-Jul-2010 | Mount Bulam<br>Namyangju-si<br>Gyeonggi-do<br>( 37°39 N, 127°5 E)          | 3  | Sky    | Herbivore | 204 | KC413791 |

|       |                                                    |       |            |       |             |                                                                   |   |        |           |     |          |
|-------|----------------------------------------------------|-------|------------|-------|-------------|-------------------------------------------------------------------|---|--------|-----------|-----|----------|
| J_418 | <i>Orthetrum melania</i><br>(Selys)                | 55-58 | Odonata    | adult | 22-Jul-2010 | Mount Bulam<br>Namyangju-si<br>Gyeonggi-do<br>( 37°39 N, 127°5 E) | 3 | Sky    | Carnivore | 10  | KC413798 |
| J_462 | <i>Baliga micans</i><br>(McLachlan)                | 45-47 | Neuroptera | adult | 24-Jul-2010 | Soheul-eup<br>Pocheon-si<br>Gyeonggi-do<br>( 37°45 N 127° 9 E)    | 1 | Sky    | Carnivore | 108 | KC413912 |
| J_464 | <i>Lamelligomphus ringens</i><br>(Needham)         | 62-65 | Odonata    | adult | 24-Jul-2010 | Soheul-eup<br>Pocheon-si<br>Gyeonggi-do<br>( 37°45 N 127° 9 E)    | 1 | Sky    | Carnivore | 14  | KC413775 |
| J_473 | <i>Elimaea fallax</i><br>(Bey-Bienko)              | 14-15 | Orthoptera | nymph | 24-Jul-2010 | Soheul-eup<br>Pocheon-si<br>Gyeonggi-do<br>( 37°45 N 127° 9 E)    | 1 | Ground | Herbivore | 39  | KC413708 |
| J_481 | <i>Atylotus horvathi</i><br>(Szilady)              | 13-14 | Diptera    | adult | 24-Jul-2010 | Soheul-eup<br>Pocheon-si<br>Gyeonggi-do<br>( 37°45 N 127° 9 E)    | 1 | Sky    | Carnivore | 200 | KC413917 |
| J_494 | <i>Poecilocoris splendidulus</i><br>(Esaki)        | 12-14 | Hemiptera  | nymph | 24-Jul-2010 | Soheul-eup<br>Pocheon-si<br>Gyeonggi-do<br>( 37°45 N 127° 9 E)    | 1 | Ground | Herbivore | 67  | KC413897 |
| J_501 | <i>Paratachycines ussuriensis</i><br>(Storozhenko) | 23-25 | Orthoptera | adult | 25-Jul-2010 | Mount Bulam<br>Namyangju-si<br>Gyeonggi-do<br>( 37°39 N, 127°5 E) | 3 | Ground | Omnivore  | 27  | KC413711 |
| J_551 | <i>Phaneroptera nigroantennata</i><br>(Brunner)    | 6-7   | Orthoptera | nymph | 29-Jul-2010 | Mount Bulam<br>Namyangju-si<br>Gyeonggi-do<br>( 37°39 N, 127°5 E) | 3 | Ground | Herbivore | 38  | KC413726 |
| J_562 | <i>Phaneroptera nigroantennata</i><br>(Brunner)    | 5-6   | Orthoptera | nymph | 29-Jul-2010 | Mount Bulam<br>Namyangju-si<br>Gyeonggi-do<br>( 37°39 N, 127°5 E) | 3 | Ground | Herbivore | 38  | KC413700 |
| J_582 | <i>Haematoloecha nigrorufa</i><br>(Stal)           | 13-14 | Hemiptera  | nymph | 31-Jul-2010 | Soheul-eup<br>Pocheon-si<br>Gyeonggi-do<br>( 37°45 N 127° 9 E)    | 1 | Ground | Carnivore | 60  | KC413901 |
| J_585 | <i>Sinochlora longifissa</i><br>(Matsumura)        | 18-20 | Orthoptera | nymph | 31-Jul-2010 | Soheul-eup<br>Pocheon-si<br>Gyeonggi-do<br>( 37°45 N 127° 9 E)    | 1 | Ground | Omnivore  | 40  | KC413729 |
| J_589 | <i>Sympetrum pedemontanum</i><br>(Selys)           | 33-35 | Odonata    | adult | 31-Jul-2010 | Soheul-eup<br>Pocheon-si<br>Gyeonggi-do<br>( 37°45 N 127° 9 E)    | 1 | Sky    | Carnivore | 13  | KC413799 |
| J_251 | <i>Rhopalus maculatus</i>                          | 5-6   | Hemiptera  | nymph | 8-Jul-      | Jungnangcheon                                                     | 2 | Ground | Herbivore | 63  | KC413900 |

|          |                                               |       |             |       |             |                                                                             |   |             |           |     |          |  |
|----------|-----------------------------------------------|-------|-------------|-------|-------------|-----------------------------------------------------------------------------|---|-------------|-----------|-----|----------|--|
|          | (Fieber)                                      |       |             |       | 2010        | Seoul<br>( 37°36 N, 127° 4 E)<br>Mount Bulam<br>Namyangju-si<br>Gyeonggi-do |   |             |           |     |          |  |
| J_651    | <i>Gryllotalpa orientalis</i><br>(Burmeister) | 13-15 | Orthoptera  | nymph | 4-Aug-2010  | ( 37°39 N, 127°5 E)<br>Soheul-eup<br>Pocheon-si<br>Gyeonggi-do              | 3 | Underground | Omnivore  | 79  | -        |  |
| J_676    | <i>Drostrombus politus</i><br>(Uhler)         | 4-5   | Hemiptera   | adult | 8-Aug-2010  | ( 37°45 N 127° 9 E)<br>Soheul-eup<br>Pocheon-si<br>Gyeonggi-do              | 1 | Ground      | Herbivore | 76  | -        |  |
| J_698_2  | Pterophoridae sp.                             | 7-8   | Lepidoptera | adult | 8-Aug-2010  | ( 37°45 N 127° 9 E)<br>Soheul-eup<br>Pocheon-si<br>Gyeonggi-do              | 1 | Sky         | Herbivore | 190 | KC413875 |  |
| J_700    | <i>Eusilpha jakowlewi</i><br>(Semenov)        | 17-18 | Coleoptera  | larva | 8-Aug-2010  | ( 37°45 N 127° 9 E)<br>Soheul-eup<br>Pocheon-si<br>Gyeonggi-do              | 1 | Ground      | Carnivore | 119 | KC413740 |  |
| J_139    | Melanotus sp.                                 | 15-16 | Coleoptera  | adult | 13-Aug-2011 | ( 37°45 N 127° 9 E)<br>Soheul-eup<br>Pocheon-si<br>Gyeonggi-do              | 1 | Ground      | Herbivore | 127 | KC413923 |  |
| J_049    | <i>Blattella nipponica</i><br>(Asahina)       | 15-16 | Blattaria   | adult | 13-Aug-2011 | ( 37°45 N 127° 9 E)<br>Soheul-eup<br>Pocheon-si<br>Gyeonggi-do              | 1 | Ground      | Omnivore  | 33  | KC413922 |  |
| J_556    | <i>Lycorma delicatula</i><br>(White)          | 7-8   | Hemiptera   | larva | 20-Jul-2011 | ( 37°45 N 127° 9 E)<br>Soheul-eup<br>Pocheon-si<br>Gyeonggi-do              | 1 | Ground      | Herbivore | 49  | KC413937 |  |
| CH_011   | <i>Bemisia tabaci</i><br>(Gennadius)          | 1     | Hemiptera   | adult | 13-Aug-2011 | ( 37°45 N 127° 9 E)<br>Soheul-eup<br>Pocheon-si<br>Gyeonggi-do              | 1 | Ground      | Herbivore | 74  | -        |  |
| J_358    | <i>Lycorma delicatula</i><br>(White)          | 23-25 | Hemiptera   | adult | 23-Sep-2011 | ( 37°45 N 127° 9 E)<br>Soheul-eup<br>Pocheon-si<br>Gyeonggi-do              | 1 | Ground      | Herbivore | 49  | KC413929 |  |
| J_391    | <i>Illeis koebelei</i><br>(Timberlake)        | 4-5   | Coleoptera  | adult | 23-Sep-2011 | ( 37°45 N 127° 9 E)<br>Soheul-eup<br>Pocheon-si<br>Gyeonggi-do              | 1 | Ground      | Fungivore | 139 | KC413930 |  |
| J_376    | Onthophagus sp.                               | 7-8   | Coleoptera  | adult | 20-Jul-2011 | ( 37°45 N 127° 9 E)<br>Soheul-eup<br>Pocheon-si<br>Gyeonggi-do              | 1 | Underground | Scavenger | 144 | KC413933 |  |
| DS_3_018 | <i>Gametis jucunda</i><br>(Faldermann)        | 9-10  | Coleoptera  | adult | 20-Jul-2011 | Soheul-eup<br>Pocheon-si<br>Gyeonggi-do                                     | 1 | Ground      | Herbivore | 146 | KC413924 |  |

|          |                                                        |       |                        |       |             |                                                                |   |         |           |     |          |
|----------|--------------------------------------------------------|-------|------------------------|-------|-------------|----------------------------------------------------------------|---|---------|-----------|-----|----------|
| DS_F_020 | <i>Trichius succinctus</i><br>(Pallas)                 | 9-10  | Coleoptera             | adult | 20-Jul-2011 | ( 37°45 N 127° 9 E)<br>Soheul-eup<br>Pocheon-si<br>Gyeonggi-do | 1 | Ground  | Herbivore | 147 | KC413928 |
| H_012    | <i>Sphedanolestes impressicollis</i><br>(Stal)         | 13-14 | Hemiptera              | adult | 13-Aug-2011 | ( 37°45 N 127° 9 E)<br>Soheul-eup<br>Pocheon-si<br>Gyeonggi-do | 1 | Ground  | Carnivore | 61  | KC413925 |
| JH1      | <i>Parachauliodes continentalis</i><br>(Van der Weele) | 23-24 | Megaloptera            | larva | 13-Aug-2011 | ( 37°45 N 127° 9 E)<br>Soheul-eup<br>Pocheon-si<br>Gyeonggi-do | 1 | Aquatic | Carnivore | 111 | -        |
| JH2      | <i>Parachauliodes continentalis</i><br>(Van der Weele) | 23-24 | Megaloptera            | larva | 13-Aug-2011 | ( 37°45 N 127° 9 E)<br>Soheul-eup<br>Pocheon-si<br>Gyeonggi-do | 1 | Aquatic | Carnivore | 111 | -        |
| JH3      | <i>Tipula</i> sp.                                      | 14-16 | Diptera                | larva | 20-Jul-2011 | ( 37°45 N 127° 9 E)<br>Soheul-eup<br>Pocheon-si<br>Gyeonggi-do | 1 | Aquatic | Scavenger | 196 | KC413936 |
| JH4      | <i>Odonata</i> sp.                                     | 15-16 | Odonata                | larva | 20-Jul-2011 | ( 37°45 N 127° 9 E)<br>Soheul-eup<br>Pocheon-si<br>Gyeonggi-do | 1 | Aquatic | Carnivore | 8   | KC413934 |
| JH5      | <i>Trichoptera</i> sp.                                 | 14-15 | <i>Trichoptera</i> sp. | larva | 13-Aug-2011 | ( 37°45 N 127° 9 E)<br>Soheul-eup<br>Pocheon-si<br>Gyeonggi-do | 1 | Aquatic | Scavenger | 153 | KC413932 |
| JH6      | <i>Lycorma delicatula</i><br>(White)                   | 14-15 | Hemiptera              | larva | 20-Jul-2011 | ( 37°45 N 127° 9 E)<br>Soheul-eup<br>Pocheon-si<br>Gyeonggi-do | 1 | Ground  | Herbivore | 49  | KC413926 |
| JH7      | <i>Tenodera sinensis</i><br>(Saussure)                 | 57-59 | Mantodea               | adult | 23-Sep-2011 | ( 37°45 N 127° 9 E)<br>Soheul-eup<br>Pocheon-si<br>Gyeonggi-do | 1 | Ground  | Carnivore | 31  | KC413931 |
| JH8      | <i>Tenodera angustipennis</i><br>(Saussure)            | 62-64 | Mantodea               | adult | 23-Sep-2011 | ( 37°45 N 127° 9 E)<br>Soheul-eup<br>Pocheon-si<br>Gyeonggi-do | 1 | Ground  | Carnivore | 30  | KC413921 |
| JH9      | <i>Myrmeleontidae</i> sp.                              | 53-55 | Neuroptera             | adult | 13-Aug-2011 | ( 37°45 N 127° 9 E)<br>Soheul-eup<br>Pocheon-si<br>Gyeonggi-do | 1 | Sky     | Carnivore | 110 | KC413935 |
| JH10     | <i>Parachauliodes continentalis</i><br>(Van der Weele) | 34-36 | Megaloptera            | adult | 20-Jul-2011 | ( 37°45 N 127° 9 E)<br>Soheul-eup<br>Pocheon-si<br>Gyeonggi-do | 1 | Sky     | Carnivore | 111 | -        |

|      |                                |       |             |       |             |                                                                |    |        |           |     |          |
|------|--------------------------------|-------|-------------|-------|-------------|----------------------------------------------------------------|----|--------|-----------|-----|----------|
| JH11 | Lepidoptera sp.                | 19-21 | Lepidoptera | adult | 13-Aug-2011 | Soheul-eup<br>Pocheon-si<br>Gyeonggi-do<br>( 37°45 N 127° 9 E) | 1  | Sky    | Herbivore | 195 | KC413927 |
| DL1  | <i>Drosophila melanogaster</i> | 2-3   | Diptera     | larva | 20-Mar-2012 | Lab reared                                                     | NA | Ground | Fungivore | 211 | KC413938 |
| DA1  | <i>Drosophila melanogaster</i> | 2-3   | Diptera     | adult | 20-Mar-2012 | Lab reared                                                     | NA | Ground | Fungivore | 211 | KC413939 |
| DA2  | <i>Drosophila melanogaster</i> | 2-3   | Diptera     | adult | 20-Mar-2012 | Lab reared                                                     | NA | Ground | Fungivore | 211 | KC413920 |

---

**Supplementary Table S2.** Diversity indices for insect gut microbiota. The operational taxonomic units (OTUs) were calculated using mothur with a 3% distance level. Mothur was used to calculate Good's coverage, abundance-based coverage estimator (ACE), bias-corrected Chao1 richness estimator, Jackknife estimator of species richness, and the Shannon-Weaver and Simpson diversity indices. The average of the Good's coverages was 0.92 (SD =  $\pm$  0.073), even though some insect samples showed low values of the Good's coverage.

| Group     | Coverage | Sequences | Sobs | Chao    | Ace     | Jackknife | Shannon | Simpson |
|-----------|----------|-----------|------|---------|---------|-----------|---------|---------|
| J_396     | 0.970    | 1386      | 225  | 241.078 | 248.511 | 266.000   | 4.800   | 0.013   |
| J_640     | 0.815    | 313       | 103  | 156.323 | 280.599 | 162.529   | 3.674   | 0.068   |
| DS_014    | 0.973    | 219       | 12   | 15.750  | 19.920  | 18.000    | 0.990   | 0.493   |
| J_024     | 0.879    | 684       | 151  | 257.344 | 284.485 | 286.167   | 3.736   | 0.059   |
| J_025     | 0.980    | 248       | 17   | 22.000  | 21.284  | 22.000    | 1.977   | 0.193   |
| J_101     | 0.986    | 138       | 9    | 9.333   | 10.947  | 0.000     | 1.236   | 0.397   |
| J_103     | 0.980    | 1096      | 98   | 106.250 | 111.599 | 120.000   | 2.870   | 0.162   |
| J_176     | 0.956    | 182       | 24   | 29.600  | 38.269  | 32.000    | 2.347   | 0.155   |
| J_177     | 0.923    | 287       | 37   | 114.000 | 107.745 | 143.646   | 1.830   | 0.374   |
| J_204_1   | 0.747    | 718       | 319  | 568.561 | 607.417 | 715.769   | 5.262   | 0.012   |
| J_299     | 0.952    | 544       | 56   | 92.111  | 87.452  | 89.650    | 2.448   | 0.176   |
| J_418     | 0.986    | 222       | 9    | 12.000  | 11.607  | 19.796    | 0.878   | 0.614   |
| J_464     | 0.911    | 158       | 23   | 45.750  | 52.918  | 44.862    | 1.831   | 0.277   |
| J_475_1   | 0.955    | 741       | 59   | 117.667 | 140.021 | 127.122   | 1.230   | 0.634   |
| J_589     | 0.768    | 190       | 69   | 141.769 | 216.415 | 147.865   | 3.237   | 0.127   |
| JH4       | 0.957    | 235       | 37   | 40.462  | 46.473  | 47.000    | 2.370   | 0.243   |
| DS_023    | 0.997    | 353       | 9    | 9.000   | 9.831   | 0.000     | 1.237   | 0.397   |
| DS_024    | 0.942    | 1439      | 163  | 262.600 | 278.475 | 292.087   | 1.867   | 0.528   |
| J_335     | 0.768    | 492       | 211  | 351.022 | 380.666 | 397.118   | 4.938   | 0.011   |
| J_351     | 0.895    | 741       | 162  | 258.871 | 336.902 | 295.415   | 4.119   | 0.035   |
| J_687     | 0.819    | 503       | 160  | 323.800 | 467.265 | 384.770   | 4.310   | 0.030   |
| J_691     | 0.958    | 1050      | 138  | 171.786 | 183.677 | 182.154   | 4.071   | 0.032   |
| PYS_004   | 0.937    | 695       | 174  | 195.500 | 201.070 | 218.000   | 4.566   | 0.021   |
| PYS_001_1 | 0.948    | 1253      | 173  | 225.000 | 229.307 | 240.221   | 3.212   | 0.141   |
| DS_003    | 0.978    | 178       | 13   | 19.000  | 22.946  | 32.435    | 2.070   | 0.152   |
| J_056     | 0.842    | 190       | 59   | 113.375 | 96.308  | 113.219   | 3.589   | 0.038   |
| J_065     | 0.790    | 324       | 110  | 363.111 | 341.516 | 390.695   | 4.009   | 0.037   |
| J_156     | 0.891    | 552       | 151  | 193.143 | 211.193 | 211.000   | 4.272   | 0.029   |
| J_385     | 0.928    | 1090      | 256  | 306.508 | 322.325 | 335.000   | 4.917   | 0.015   |
| J_410     | 0.917    | 507       | 106  | 163.400 | 151.306 | 208.607   | 3.931   | 0.039   |
| J_523     | 0.946    | 482       | 53   | 89.111  | 111.814 | 98.648    | 2.117   | 0.299   |
| J_570     | 0.911    | 830       | 194  | 259.878 | 276.436 | 273.258   | 4.612   | 0.018   |
| DS_115    | 0.974    | 548       | 36   | 46.111  | 52.266  | 50.000    | 1.770   | 0.352   |
| DS_F_026  | 0.982    | 1299      | 108  | 116.724 | 124.066 | 131.000   | 3.036   | 0.122   |
| J_165_1   | 0.991    | 557       | 18   | 23.000  | 22.152  | 23.000    | 1.779   | 0.237   |

|            |       |      |     |         |          |          |       |       |
|------------|-------|------|-----|---------|----------|----------|-------|-------|
| J_593      | 0.959 | 587  | 42  | 81.429  | 133.787  | 84.431   | 1.062 | 0.673 |
| JH7        | 0.917 | 109  | 21  | 26.143  | 29.431   | 30.000   | 2.173 | 0.172 |
| JH8        | 0.906 | 213  | 76  | 82.129  | 86.207   | 96.000   | 4.032 | 0.021 |
| DS_2_032   | 0.953 | 472  | 73  | 90.769  | 89.277   | 95.000   | 2.852 | 0.189 |
| J_002      | 0.973 | 184  | 17  | 18.429  | 20.579   | 22.000   | 1.613 | 0.309 |
| J_003      | 0.926 | 418  | 84  | 102.600 | 109.653  | 115.000  | 3.438 | 0.073 |
| J_049      | 0.944 | 443  | 87  | 99.000  | 110.363  | 112.000  | 3.662 | 0.053 |
| J_504      | 0.939 | 578  | 158 | 170.143 | 181.252  | 193.000  | 4.748 | 0.010 |
| CH_015     | 0.964 | 224  | 25  | 34.333  | 30.586   | 3239.986 | 2.085 | 0.225 |
| DS_3_046   | 0.529 | 51   | 34  | 68.500  | 135.579  | 67.030   | 3.345 | 0.027 |
| DS_106     | 0.914 | 441  | 121 | 141.676 | 153.329  | 159.000  | 4.371 | 0.016 |
| DS_F_004   | 0.845 | 232  | 64  | 121.273 | 119.345  | 153.656  | 3.092 | 0.124 |
| DS_F_005   | 0.867 | 240  | 62  | 107.091 | 169.646  | 117.486  | 3.353 | 0.062 |
| DS_F_016   | 0.876 | 410  | 89  | 168.688 | 259.238  | 200.488  | 3.147 | 0.134 |
| J_026      | 0.936 | 359  | 49  | 80.625  | 106.759  | 97.068   | 2.355 | 0.247 |
| J_030_1    | 0.898 | 236  | 41  | 96.200  | 169.965  | 103.255  | 2.696 | 0.112 |
| J_033      | 0.974 | 155  | 11  | 14.000  | 19.122   | 15.000   | 1.385 | 0.339 |
| J_035_2    | 0.853 | 266  | 80  | 141.750 | 166.611  | 230.070  | 3.770 | 0.044 |
| J_044_1    | 0.867 | 467  | 116 | 215.526 | 268.786  | 265.276  | 3.787 | 0.048 |
| J_061      | 0.955 | 402  | 39  | 56.000  | 82.913   | 57.228   | 1.453 | 0.538 |
| J_123      | 0.862 | 1838 | 455 | 764.495 | 1099.824 | 881.575  | 4.499 | 0.052 |
| J_126      | 0.833 | 192  | 60  | 130.857 | 104.576  | 132.496  | 3.561 | 0.039 |
| J_186      | 0.936 | 453  | 108 | 123.037 | 131.488  | 137.000  | 4.245 | 0.019 |
| J_197_2    | 1.000 | 198  | 5   | 5.000   | 5.000    | 5.000    | 0.417 | 0.820 |
| J_368      | 0.930 | 100  | 17  | 24.000  | 22.627   | 24.000   | 2.042 | 0.184 |
| J_425      | 0.991 | 583  | 27  | 29.000  | 29.646   | 32.000   | 1.788 | 0.331 |
| J_473      | 0.766 | 128  | 60  | 84.167  | 93.731   | 90.000   | 3.782 | 0.027 |
| J_501      | 0.966 | 292  | 36  | 45.000  | 44.630   | 46.000   | 2.850 | 0.087 |
| J_551      | 0.695 | 105  | 43  | 113.857 | 147.784  | 115.010  | 3.003 | 0.089 |
| J_562      | 0.647 | 51   | 26  | 56.600  | 112.758  | 57.937   | 2.873 | 0.068 |
| J_578      | 0.926 | 296  | 39  | 77.500  | 143.837  | 82.840   | 2.068 | 0.284 |
| J_585      | 0.729 | 207  | 74  | 459.000 | 490.246  | 1527.959 | 3.199 | 0.126 |
| J_642      | 0.940 | 420  | 99  | 108.091 | 115.433  | 124.000  | 3.913 | 0.046 |
| J_651      | 0.926 | 484  | 130 | 148.000 | 155.758  | 166.000  | 4.399 | 0.018 |
| CH_11      | 0.972 | 1408 | 90  | 135.882 | 186.097  | 139.310  | 1.626 | 0.534 |
| DS_016     | 0.970 | 535  | 42  | 54.000  | 57.856   | 58.000   | 1.513 | 0.508 |
| DS_072     | 0.960 | 351  | 40  | 53.000  | 50.441   | 54.000   | 2.396 | 0.176 |
| DS_073     | 0.756 | 398  | 171 | 304.029 | 417.348  | 360.899  | 4.611 | 0.022 |
| DS_089     | 0.881 | 648  | 133 | 241.370 | 440.384  | 263.331  | 3.553 | 0.073 |
| DS_2_042   | 0.983 | 587  | 29  | 40.250  | 39.343   | 39.566   | 1.823 | 0.264 |
| DS_3_058_1 | 0.856 | 250  | 59  | 129.000 | 120.014  | 153.174  | 2.677 | 0.203 |
| DS_F_003   | 0.987 | 154  | 12  | 12.333  | 13.233   | 0.000    | 1.674 | 0.265 |
| ex_006     | 0.952 | 233  | 258 | 322.667 | 352.240  | 355.174  | 3.651 | 0.089 |
| H_012      | 0.893 | 1584 | 47  | 72.000  | 87.915   | 73.075   | 2.285 | 0.292 |
| H_024      | 0.942 | 2017 | 220 | 294.750 | 325.540  | 313.955  | 3.741 | 0.072 |
| J_001      | 0.994 | 1003 | 23  | 26.750  | 33.199   | 29.000   | 1.538 | 0.360 |
| J_096      | 0.968 | 647  | 79  | 93.000  | 93.898   | 100.000  | 3.287 | 0.089 |
| J_132      | 0.998 | 578  | 9   | 9.000   | 9.450    | 0.000    | 0.601 | 0.716 |
| J_134      | 0.985 | 336  | 14  | 15.667  | 20.167   | 19.000   | 0.910 | 0.587 |



|         |       |      |     |         |         |         |       |       |
|---------|-------|------|-----|---------|---------|---------|-------|-------|
| J_166   | 0.818 | 198  | 60  | 105.000 | 196.049 | 101.621 | 3.034 | 0.130 |
| J_167   | 0.983 | 363  | 24  | 26.500  | 29.450  | 30.000  | 2.033 | 0.192 |
| J_191_1 | 0.904 | 447  | 87  | 137.167 | 238.829 | 135.768 | 3.570 | 0.048 |
| J_212   | 0.984 | 577  | 47  | 50.000  | 53.779  | 56.000  | 2.770 | 0.121 |
| J_226   | 0.988 | 571  | 37  | 38.909  | 41.202  | 44.000  | 1.671 | 0.439 |
| J_251   | 0.905 | 645  | 104 | 211.647 | 204.602 | 248.913 | 2.511 | 0.291 |
| J_278   | 0.878 | 645  | 133 | 279.714 | 367.451 | 390.260 | 3.089 | 0.160 |
| J_358   | 0.827 | 381  | 133 | 190.973 | 206.403 | 201.842 | 4.076 | 0.048 |
| J_369   | 0.736 | 507  | 252 | 366.244 | 443.633 | 388.847 | 5.241 | 0.006 |
| J_402   | 0.998 | 5304 | 169 | 169.706 | 173.476 | 178.000 | 2.163 | 0.421 |
| J_421   | 0.823 | 215  | 62  | 132.300 | 233.743 | 144.981 | 3.289 | 0.070 |
| J_494   | 0.683 | 208  | 97  | 216.167 | 373.758 | 268.031 | 3.902 | 0.047 |
| J_556   | 0.652 | 178  | 82  | 271.100 | 514.507 | 287.032 | 3.629 | 0.071 |
| J_576   | 0.957 | 235  | 20  | 31.250  | 34.844  | 30.871  | 1.565 | 0.310 |
| J_582   | 0.831 | 432  | 121 | 226.120 | 340.022 | 246.547 | 3.537 | 0.099 |
| J_598   | 0.991 | 1036 | 62  | 63.800  | 67.391  | 71.000  | 2.459 | 0.206 |
| J_600   | 0.982 | 827  | 58  | 66.077  | 69.186  | 73.000  | 2.654 | 0.139 |
| J_655   | 0.950 | 282  | 26  | 71.500  | 67.000  | 60.741  | 1.402 | 0.509 |
| J_668   | 0.970 | 2385 | 133 | 239.500 | 370.010 | 261.655 | 1.444 | 0.586 |
| J_669   | 0.971 | 950  | 58  | 92.364  | 93.627  | 104.717 | 1.229 | 0.596 |
| J_676   | 0.946 | 168  | 16  | 25.000  | 34.000  | 25.000  | 1.587 | 0.295 |
| J_718   | 0.954 | 694  | 82  | 115.067 | 117.152 | 526.468 | 2.497 | 0.273 |
| J_733   | 0.802 | 435  | 150 | 276.034 | 281.534 | 302.885 | 4.037 | 0.069 |
| J_734   | 0.945 | 200  | 27  | 34.857  | 48.432  | 38.000  | 2.249 | 0.167 |
| J_754   | 0.905 | 601  | 116 | 177.385 | 247.920 | 188.082 | 3.227 | 0.141 |
| JH6     | 0.896 | 106  | 23  | 30.857  | 48.983  | 34.000  | 2.154 | 0.223 |
| CH_019  | 0.905 | 518  | 102 | 171.176 | 222.375 | 198.392 | 3.646 | 0.054 |
| BGS_01  | 0.939 | 749  | 95  | 155.882 | 204.410 | 171.110 | 3.196 | 0.083 |
| BGS_02  | 0.926 | 393  | 61  | 94.833  | 101.095 | 93.457  | 2.879 | 0.114 |
| BGS_03  | 0.915 | 552  | 98  | 154.895 | 210.281 | 161.327 | 3.330 | 0.082 |
| BGS_04  | 0.958 | 600  | 78  | 99.429  | 100.515 | 103.067 | 3.384 | 0.067 |
| BGS_05  | 0.928 | 319  | 47  | 78.625  | 118.904 | 76.271  | 2.756 | 0.113 |
| BJA_01  | 0.894 | 359  | 83  | 122.056 | 176.982 | 123.882 | 3.671 | 0.045 |
| BJA_02  | 0.927 | 558  | 94  | 152.571 | 207.616 | 166.599 | 3.761 | 0.039 |
| BJA_03  | 0.909 | 552  | 95  | 171.563 | 223.926 | 183.251 | 3.074 | 0.128 |
| BJA_04  | 0.928 | 725  | 102 | 184.875 | 274.528 | 218.208 | 3.221 | 0.095 |
| BJA_05  | 0.924 | 512  | 80  | 121.167 | 134.220 | 121.696 | 2.988 | 0.113 |
| BKS_01  | 0.945 | 401  | 44  | 82.500  | 107.405 | 85.473  | 2.353 | 0.214 |
| BKS_02  | 0.955 | 508  | 54  | 75.083  | 84.619  | 77.375  | 2.555 | 0.162 |
| BKS_03  | 0.930 | 213  | 45  | 62.500  | 57.377  | 65.177  | 3.362 | 0.043 |
| BKS_04  | 0.941 | 563  | 75  | 110.200 | 116.476 | 111.459 | 2.892 | 0.118 |
| BKS_05  | 0.939 | 440  | 56  | 99.875  | 115.982 | 106.301 | 2.574 | 0.158 |
| BSL_01  | 0.920 | 286  | 56  | 71.813  | 87.148  | 79.000  | 3.092 | 0.088 |
| BSL_02  | 0.909 | 231  | 39  | 69.000  | 94.457  | 69.890  | 2.339 | 0.195 |
| BSL_03  | 0.889 | 198  | 41  | 87.200  | 125.204 | 90.497  | 2.995 | 0.071 |
| BSL_04  | 0.916 | 371  | 71  | 122.667 | 107.513 | 142.576 | 3.365 | 0.079 |
| BSL_05  | 0.949 | 316  | 46  | 56.909  | 60.170  | 62.000  | 2.665 | 0.154 |
| BSS_01  | 0.935 | 263  | 41  | 58.000  | 62.500  | 58.972  | 2.604 | 0.148 |
| BSS_02  | 0.899 | 385  | 76  | 133.000 | 204.588 | 140.249 | 3.361 | 0.069 |

|          |       |      |     |         |         |         |       |       |
|----------|-------|------|-----|---------|---------|---------|-------|-------|
| BSS_03   | 0.921 | 341  | 63  | 102.000 | 92.223  | 110.989 | 3.284 | 0.065 |
| BSS_04   | 0.922 | 475  | 73  | 120.571 | 191.943 | 120.300 | 3.004 | 0.108 |
| BSS_05   | 0.919 | 356  | 62  | 93.231  | 127.638 | 93.894  | 2.956 | 0.110 |
| DS_021   | 0.973 | 783  | 47  | 82.000  | 96.979  | 85.607  | 2.028 | 0.237 |
| DS_038   | 0.926 | 243  | 37  | 62.500  | 103.593 | 58.275  | 2.753 | 0.103 |
| DS_043   | 0.995 | 610  | 25  | 25.500  | 27.018  | 0.000   | 2.278 | 0.149 |
| DS_044   | 0.991 | 641  | 31  | 33.500  | 34.719  | 37.000  | 2.402 | 0.122 |
| DS_052   | 0.953 | 403  | 101 | 105.171 | 112.913 | 120.000 | 4.125 | 0.026 |
| DS_3_005 | 0.973 | 291  | 37  | 40.111  | 44.360  | 45.000  | 3.129 | 0.053 |
| DS_3_008 | 0.971 | 315  | 59  | 61.118  | 63.539  | 68.000  | 3.562 | 0.042 |
| DS_F_011 | 0.988 | 972  | 29  | 40.000  | 43.896  | 41.000  | 1.332 | 0.374 |
| DS_F_023 | 0.864 | 132  | 37  | 56.125  | 75.213  | 55.898  | 2.969 | 0.082 |
| H_007    | 0.812 | 999  | 359 | 647.164 | 802.544 | 858.188 | 5.404 | 0.006 |
| J_031    | 0.956 | 405  | 48  | 78.600  | 82.393  | 132.319 | 2.932 | 0.093 |
| J_089    | 0.910 | 133  | 29  | 36.333  | 57.175  | 41.000  | 2.719 | 0.090 |
| J_118    | 0.885 | 209  | 64  | 80.235  | 90.288  | 88.000  | 3.772 | 0.027 |
| J_155    | 0.963 | 777  | 62  | 102.600 | 99.143  | 127.740 | 2.403 | 0.150 |
| J_163    | 0.992 | 964  | 33  | 36.500  | 41.279  | 41.000  | 2.124 | 0.166 |
| J_209    | 0.975 | 1130 | 72  | 90.000  | 107.476 | 100.000 | 1.928 | 0.353 |
| J_228    | 0.985 | 805  | 31  | 44.200  | 42.157  | 45.912  | 1.017 | 0.629 |
| J_239    | 0.962 | 664  | 59  | 79.000  | 88.245  | 84.000  | 1.840 | 0.398 |
| J_254    | 0.914 | 314  | 57  | 82.071  | 89.856  | 84.550  | 2.494 | 0.251 |
| J_286    | 0.789 | 454  | 145 | 335.000 | 574.958 | 417.502 | 3.720 | 0.096 |
| J_344    | 0.930 | 214  | 26  | 52.250  | 71.264  | 53.137  | 1.911 | 0.239 |
| J_450    | 0.963 | 515  | 40  | 57.100  | 65.983  | 59.000  | 1.919 | 0.273 |
| J_571    | 0.961 | 255  | 39  | 44.625  | 46.421  | 49.000  | 2.853 | 0.107 |
| J_581    | 0.976 | 330  | 22  | 27.600  | 29.165  | 30.000  | 1.569 | 0.360 |
| J_595    | 0.852 | 230  | 61  | 117.100 | 179.844 | 126.681 | 3.315 | 0.063 |
| J_625    | 0.887 | 257  | 39  | 140.500 | 197.101 | 120.410 | 1.488 | 0.517 |
| J_658    | 0.949 | 294  | 41  | 51.500  | 52.148  | 56.000  | 2.366 | 0.187 |
| J_695    | 0.977 | 1357 | 125 | 144.375 | 149.821 | 156.000 | 3.756 | 0.050 |
| J_717    | 0.837 | 1187 | 382 | 642.014 | 662.697 | 783.721 | 5.353 | 0.009 |
| JH5      | 0.755 | 102  | 39  | 72.333  | 84.851  | 69.735  | 2.768 | 0.160 |
| PYS_002  | 0.883 | 349  | 66  | 157.111 | 206.658 | 173.836 | 2.410 | 0.267 |
| DS_013   | 0.995 | 410  | 14  | 14.250  | 14.683  | 0.000   | 1.013 | 0.585 |
| DS_017   | 0.933 | 990  | 206 | 248.900 | 268.462 | 272.000 | 4.667 | 0.018 |
| DS_018   | 0.984 | 1217 | 53  | 80.143  | 76.490  | 91.072  | 1.859 | 0.313 |
| DS_056   | 0.999 | 1017 | 18  | 18.000  | 18.494  | 0.000   | 1.000 | 0.601 |
| DS_060   | 0.993 | 610  | 27  | 27.750  | 29.950  | 31.000  | 2.071 | 0.216 |
| DS_065   | 0.851 | 121  | 32  | 51.125  | 81.310  | 50.930  | 2.506 | 0.154 |
| DS_3_075 | 0.953 | 214  | 27  | 36.000  | 63.128  | 37.000  | 2.654 | 0.090 |
| J_010    | 0.990 | 1741 | 54  | 69.111  | 68.041  | 71.000  | 1.478 | 0.440 |
| J_018    | 0.985 | 1085 | 58  | 66.000  | 73.329  | 74.000  | 2.157 | 0.290 |
| J_036    | 0.994 | 1625 | 37  | 49.000  | 43.142  | 55.358  | 1.271 | 0.523 |
| J_050    | 0.763 | 287  | 118 | 231.900 | 300.047 | 284.192 | 4.297 | 0.021 |
| J_071    | 0.925 | 321  | 49  | 76.600  | 84.871  | 75.678  | 2.675 | 0.131 |
| J_072    | 0.998 | 1865 | 29  | 29.500  | 30.632  | 0.000   | 1.585 | 0.365 |
| J_080    | 0.792 | 583  | 227 | 428.667 | 399.806 | 524.316 | 5.021 | 0.008 |
| J_090    | 0.897 | 253  | 74  | 93.118  | 98.126  | 100.000 | 3.925 | 0.023 |

|          |       |      |     |         |         |          |       |       |
|----------|-------|------|-----|---------|---------|----------|-------|-------|
| J_104    | 0.967 | 520  | 51  | 60.067  | 65.418  | 68.000   | 2.370 | 0.178 |
| J_111    | 0.981 | 631  | 46  | 52.600  | 54.231  | 58.000   | 2.436 | 0.158 |
| J_114    | 0.981 | 513  | 33  | 38.000  | 40.772  | 43.000   | 2.006 | 0.265 |
| J_115    | 0.991 | 804  | 29  | 32.500  | 34.874  | 36.000   | 1.760 | 0.315 |
| J_121    | 0.955 | 448  | 54  | 69.833  | 74.895  | 74.000   | 3.031 | 0.079 |
| J_124    | 0.985 | 845  | 50  | 63.000  | 60.839  | 63.000   | 2.708 | 0.111 |
| J_133    | 0.974 | 427  | 33  | 39.111  | 46.808  | 44.000   | 2.211 | 0.192 |
| J_172    | 0.975 | 592  | 43  | 58.000  | 70.554  | 58.232   | 2.460 | 0.154 |
| J_175    | 0.960 | 505  | 49  | 64.833  | 71.913  | 69.000   | 2.474 | 0.149 |
| J_178    | 0.894 | 379  | 95  | 140.882 | 141.526 | 1402.618 | 3.878 | 0.035 |
| J_179_1  | 0.991 | 746  | 31  | 38.000  | 35.831  | 38.000   | 2.059 | 0.251 |
| J_184    | 0.750 | 132  | 65  | 91.400  | 100.275 | 98.042   | 3.934 | 0.018 |
| J_185    | 0.997 | 581  | 9   | 9.333   | 12.030  | 0.000    | 0.893 | 0.539 |
| J_194    | 0.868 | 197  | 61  | 81.313  | 93.878  | 87.000   | 3.646 | 0.034 |
| J_195    | 0.977 | 874  | 41  | 68.143  | 96.531  | 78.042   | 1.566 | 0.371 |
| J_199    | 0.888 | 338  | 83  | 118.150 | 173.349 | 122.680  | 3.684 | 0.041 |
| J_277    | 0.935 | 153  | 33  | 37.500  | 39.806  | 43.000   | 2.933 | 0.075 |
| J_317    | 0.948 | 269  | 57  | 63.067  | 66.555  | 71.000   | 3.554 | 0.040 |
| J_343    | 0.975 | 749  | 37  | 56.000  | 64.469  | 56.476   | 1.693 | 0.280 |
| J_463    | 0.938 | 497  | 86  | 108.143 | 139.276 | 117.000  | 3.597 | 0.053 |
| J_529    | 0.794 | 519  | 178 | 355.219 | 601.938 | 373.436  | 4.454 | 0.023 |
| J_573    | 0.892 | 803  | 153 | 286.607 | 438.522 | 326.019  | 3.103 | 0.198 |
| J_633    | 0.982 | 1027 | 44  | 59.545  | 88.354  | 63.000   | 1.134 | 0.580 |
| J_673    | 0.881 | 286  | 59  | 115.100 | 178.250 | 121.265  | 3.069 | 0.078 |
| J_698_2  | 0.850 | 160  | 39  | 108.000 | 157.531 | 140.290  | 2.773 | 0.108 |
| J_706    | 0.898 | 187  | 33  | 57.429  | 57.174  | 58.232   | 2.162 | 0.229 |
| J_728    | 0.982 | 2390 | 104 | 164.200 | 152.878 | 200.872  | 2.070 | 0.300 |
| J_737    | 0.967 | 670  | 54  | 79.667  | 75.376  | 85.644   | 2.462 | 0.161 |
| J_744    | 0.976 | 415  | 37  | 42.000  | 43.773  | 47.000   | 2.175 | 0.251 |
| J_751    | 0.850 | 266  | 79  | 139.000 | 175.383 | 154.031  | 3.825 | 0.030 |
| J_752    | 0.860 | 444  | 128 | 193.207 | 215.139 | 195.665  | 4.138 | 0.031 |
| JH11     | 0.839 | 149  | 46  | 73.600  | 67.191  | 81.453   | 2.684 | 0.212 |
| J_693    | 0.906 | 319  | 55  | 117.143 | 98.972  | 669.005  | 2.509 | 0.206 |
| DS_041   | 0.866 | 449  | 140 | 205.556 | 211.660 | 213.068  | 4.528 | 0.013 |
| DS_3_014 | 0.985 | 206  | 10  | 11.500  | 12.331  | 13.000   | 1.151 | 0.430 |
| J_240    | 0.933 | 614  | 79  | 137.571 | 178.701 | 148.656  | 2.594 | 0.197 |
| J_462    | 0.825 | 343  | 94  | 220.429 | 339.565 | 246.481  | 3.455 | 0.072 |
| J_548    | 0.808 | 266  | 83  | 168.000 | 247.961 | 183.119  | 3.469 | 0.069 |
| J_753    | 0.851 | 670  | 174 | 311.500 | 547.581 | 341.679  | 3.909 | 0.063 |
| JH9      | 0.938 | 81   | 17  | 18.667  | 23.912  | 22.000   | 2.356 | 0.121 |
| J_099    | 0.905 | 464  | 86  | 145.125 | 193.804 | 174.847  | 3.243 | 0.082 |
| J_320    | 0.908 | 797  | 130 | 235.120 | 358.413 | 257.383  | 3.154 | 0.121 |
| J_324    | 0.932 | 558  | 73  | 123.214 | 170.281 | 121.742  | 2.652 | 0.155 |
| JH1      | 0.918 | 1280 | 270 | 356.667 | 393.531 | 378.694  | 4.771 | 0.016 |
| JH2      | 0.947 | 1846 | 345 | 385.624 | 429.246 | 443.000  | 4.934 | 0.015 |
| JH10     | 0.825 | 114  | 37  | 64.143  | 67.398  | 63.769   | 2.984 | 0.084 |
| PYS_005  | 0.935 | 340  | 71  | 86.400  | 87.773  | 93.000   | 3.689 | 0.038 |
| DS_002   | 0.977 | 306  | 17  | 24.000  | 22.759  | 24.000   | 0.945 | 0.630 |
| DS_005   | 0.986 | 886  | 34  | 43.429  | 46.386  | 46.000   | 1.581 | 0.392 |

|          |       |      |     |          |          |          |       |       |
|----------|-------|------|-----|----------|----------|----------|-------|-------|
| DS_006   | 0.989 | 645  | 22  | 27.250   | 29.763   | 29.000   | 1.504 | 0.384 |
| DS_009   | 0.978 | 319  | 18  | 25.000   | 33.267   | 25.000   | 1.513 | 0.323 |
| DS_022   | 0.984 | 368  | 24  | 27.000   | 27.675   | 30.000   | 1.463 | 0.467 |
| DS_025   | 0.960 | 597  | 53  | 92.429   | 99.970   | 96.718   | 2.449 | 0.158 |
| DS_048   | 0.978 | 279  | 28  | 31.750   | 33.110   | 34.000   | 2.948 | 0.058 |
| DS_070   | 0.870 | 215  | 67  | 90.625   | 101.672  | 95.222   | 3.736 | 0.033 |
| DS_078   | 0.995 | 380  | 22  | 22.250   | 22.916   | 0.000    | 2.491 | 0.108 |
| DS_2_044 | 0.994 | 704  | 29  | 29.857   | 30.843   | 33.000   | 2.043 | 0.217 |
| DS_2_048 | 0.995 | 571  | 47  | 47.167   | 48.137   | 0.000    | 2.905 | 0.091 |
| DS_2_049 | 0.704 | 125  | 55  | 150.143  | 236.446  | 160.260  | 3.504 | 0.044 |
| DS_2_050 | 0.968 | 154  | 16  | 18.500   | 20.820   | 21.000   | 1.833 | 0.234 |
| DS_3_011 | 0.953 | 191  | 29  | 36.200   | 37.016   | 38.000   | 2.279 | 0.236 |
| DS_3_018 | 0.913 | 528  | 148 | 168.294  | 187.218  | 194.000  | 4.492 | 0.016 |
| DS_3_034 | 0.961 | 129  | 27  | 28.250   | 30.140   | 32.000   | 2.883 | 0.075 |
| DS_3_038 | 0.970 | 296  | 20  | 38.000   | 31.404   | 52.835   | 1.719 | 0.260 |
| DS_F_006 | 0.984 | 485  | 50  | 53.111   | 55.005   | 58.000   | 3.165 | 0.075 |
| DS_F_013 | 0.934 | 487  | 85  | 114.176  | 120.398  | 118.241  | 3.289 | 0.110 |
| DS_F_020 | 0.950 | 725  | 153 | 162.000  | 172.569  | 189.000  | 3.568 | 0.117 |
| J_005    | 0.970 | 430  | 70  | 75.571   | 77.162   | 83.000   | 3.539 | 0.055 |
| J_023    | 0.993 | 437  | 36  | 36.250   | 37.456   | 0.000    | 2.471 | 0.175 |
| J_038    | 1.000 | 359  | 32  | 32.000   | 32.000   | 32.000   | 2.502 | 0.167 |
| J_082    | 0.966 | 760  | 70  | 90.313   | 101.305  | 96.000   | 2.899 | 0.102 |
| J_097    | 0.942 | 325  | 41  | 58.100   | 65.611   | 60.000   | 2.063 | 0.306 |
| J_139    | 0.899 | 218  | 45  | 68.100   | 93.640   | 70.048   | 2.281 | 0.303 |
| J_198    | 0.986 | 422  | 27  | 28.667   | 31.884   | 33.000   | 1.691 | 0.320 |
| J_244    | 0.936 | 389  | 46  | 79.333   | 129.819  | 76.682   | 2.459 | 0.156 |
| J_353    | 0.723 | 336  | 163 | 285.229  | 310.207  | 319.334  | 4.808 | 0.008 |
| J_357_1  | 0.950 | 401  | 60  | 73.571   | 81.328   | 80.000   | 3.154 | 0.084 |
| J_376    | 0.840 | 2318 | 695 | 1119.006 | 1250.867 | 1311.194 | 5.177 | 0.047 |
| J_388    | 0.963 | 461  | 43  | 53.462   | 81.579   | 60.000   | 2.382 | 0.157 |
| J_391    | 0.809 | 236  | 77  | 138.875  | 246.901  | 140.935  | 3.658 | 0.043 |
| J_407    | 0.948 | 842  | 76  | 135.125  | 225.117  | 147.769  | 1.315 | 0.630 |
| J_417    | 0.786 | 504  | 193 | 345.053  | 522.072  | 377.197  | 4.783 | 0.012 |
| J_453    | 0.961 | 336  | 62  | 67.200   | 70.172   | 75.000   | 3.609 | 0.038 |
| J_527    | 0.939 | 1102 | 162 | 247.038  | 241.283  | 278.792  | 4.110 | 0.029 |
| J_563    | 0.877 | 560  | 137 | 254.300  | 226.371  | 498.037  | 3.803 | 0.077 |
| J_574    | 0.995 | 437  | 48  | 48.053   | 48.941   | 0.000    | 3.153 | 0.077 |
| J_624    | 0.985 | 757  | 37  | 46.167   | 48.288   | 48.000   | 2.319 | 0.163 |
| J_630    | 0.981 | 209  | 28  | 28.667   | 30.121   | 32.000   | 2.649 | 0.105 |
| J_700    | 0.968 | 785  | 98  | 107.677  | 117.016  | 123.000  | 3.110 | 0.118 |
| J_705    | 0.997 | 380  | 18  | 18.000   | 18.459   | 0.000    | 1.771 | 0.271 |
| J_745    | 0.901 | 734  | 144 | 258.261  | 355.267  | 278.782  | 3.825 | 0.070 |
| J_746    | 0.936 | 500  | 52  | 151.200  | 284.607  | 217.524  | 2.408 | 0.168 |
| J_747    | 0.895 | 592  | 133 | 194.000  | 267.474  | 198.715  | 3.663 | 0.093 |
| J_748    | 0.871 | 743  | 210 | 324.000  | 421.804  | 364.267  | 4.795 | 0.012 |
| J_749    | 0.849 | 436  | 136 | 205.194  | 279.658  | 217.016  | 4.197 | 0.034 |
| J_750    | 0.846 | 848  | 246 | 458.875  | 581.948  | 520.865  | 4.762 | 0.018 |
| DA_1     | 0.879 | 2670 | 671 | 1034.657 | 1109.040 | 1181.385 | 5.298 | 0.027 |
| DA_2     | 0.893 | 3404 | 835 | 1179.197 | 1268.863 | 1348.580 | 5.615 | 0.016 |

|            |       |         |        |         |         |         |       |       |
|------------|-------|---------|--------|---------|---------|---------|-------|-------|
| DL_1       | 0.896 | 2590    | 642    | 833.734 | 955.342 | 915.092 | 5.334 | 0.021 |
| DS_015     | 0.901 | 414     | 92     | 166.545 | 184.310 | 518.812 | 3.984 | 0.023 |
| DS_049     | 0.975 | 1088    | 79     | 104.071 | 108.506 | 107.028 | 2.909 | 0.111 |
| DS_3_058_2 | 0.934 | 152     | 16     | 31.000  | 46.000  | 28.558  | 1.588 | 0.287 |
| J_048      | 0.821 | 201     | 64     | 116.500 | 171.336 | 121.955 | 3.309 | 0.096 |
| J_074      | 0.997 | 746     | 22     | 22.143  | 23.367  | 0.000   | 2.012 | 0.188 |
| J_075      | 0.915 | 294     | 81     | 92.538  | 101.327 | 106.000 | 3.907 | 0.029 |
| J_094      | 0.982 | 725     | 35     | 46.143  | 62.702  | 48.000  | 2.062 | 0.227 |
| J_141      | 0.977 | 437     | 44     | 49.000  | 50.662  | 54.000  | 2.808 | 0.109 |
| J_190      | 0.977 | 603     | 43     | 50.000  | 56.597  | 57.000  | 2.057 | 0.245 |
| J_230      | 0.831 | 178     | 45     | 99.375  | 174.320 | 101.143 | 2.304 | 0.286 |
| J_279      | 0.950 | 321     | 27     | 44.143  | 49.643  | 43.845  | 0.809 | 0.750 |
| J_306      | 0.972 | 506     | 36     | 54.200  | 68.796  | 55.822  | 2.293 | 0.167 |
| J_395      | 0.881 | 202     | 53     | 80.600  | 79.931  | 82.142  | 3.137 | 0.104 |
| J_403      | 0.908 | 303     | 53     | 95.000  | 135.962 | 111.572 | 2.978 | 0.082 |
| J_415_1    | 0.939 | 625     | 96     | 139.938 | 166.512 | 145.722 | 3.664 | 0.045 |
| J_415_2    | 0.889 | 530     | 123    | 197.391 | 206.329 | 224.776 | 3.934 | 0.037 |
| J_461      | 0.975 | 713     | 46     | 58.750  | 66.999  | 64.000  | 2.228 | 0.176 |
| J_466      | 0.978 | 313     | 31     | 33.100  | 35.067  | 38.000  | 2.080 | 0.234 |
| J_481      | 0.983 | 419     | 19     | 22.000  | 32.610  | 26.000  | 0.691 | 0.768 |
| J_558      | 0.959 | 296     | 43     | 48.077  | 51.856  | 55.000  | 2.542 | 0.190 |
| J_580      | 0.989 | 356     | 19     | 20.200  | 23.028  | 23.000  | 1.859 | 0.247 |
| J_701      | 0.993 | 2870    | 100    | 110.500 | 114.356 | 121.000 | 2.520 | 0.172 |
| J_722      | 0.914 | 187     | 34     | 54.000  | 55.273  | 736.373 | 2.112 | 0.307 |
| JH3        | 0.934 | 667     | 183    | 199.893 | 208.783 | 227.000 | 4.690 | 0.019 |
| Mean       | 0.920 | 571.718 | 84.334 | 130.427 | 158.830 | 169.501 | 2.865 | 0.178 |
| S.D.       | 0.073 | 544.433 | 97.657 | 152.292 | 182.705 | 277.426 | 1.073 | 0.167 |

**Supplementary Table S3.** Oxygen requirements of different genera present in insect gut microbiota. A, aerobes; An, anaerobes; F, facultative anaerobes; M, microaerobes.

| Taxon                     | Oxygen requirement | References | Taxon                   | Oxygen requirement | References | Taxon                  | Oxygen requirement | References |
|---------------------------|--------------------|------------|-------------------------|--------------------|------------|------------------------|--------------------|------------|
| <i>Abiotrophia</i>        | F                  | (1)        | <i>Acetobacter</i>      | A                  | (2)        | <i>Acetobacterium</i>  | An                 | (3)        |
| <i>Acholeplasma</i>       | F                  | (4)        | <i>Acidisphaera</i>     | A                  | (5)        | <i>Acidovorax</i>      | A                  | (6)        |
| <i>Acinetobacter</i>      | A                  | (7)        | <i>Actinobacillus</i>   | A                  | (8)        | <i>Actinomyces</i>     | F                  | (9)        |
| <i>Actinomycetospora</i>  | A                  | (10)       | <i>Aeromicrobium</i>    | A                  | (11)       | <i>Aeromonas</i>       | F                  | (12)       |
| <i>Afipia</i>             | A                  | (13)       | <i>Agrobacterium</i>    | A                  | (14)       | <i>Alistipes</i>       | An                 | (15)       |
| <i>Amaricoccus</i>        | A                  | (16)       | <i>Aminobacter</i>      | A                  | (17)       | <i>Amphibacillus</i>   | F                  | (18)       |
| <i>Anabaena</i>           | A                  | (19)       | <i>Anaeroarcus</i>      | An                 | (20)       | <i>Anaerofilum</i>     | An                 | (21)       |
| <i>Anaerotruncus</i>      | An                 | (22)       | <i>Anoxybacillus</i>    | An                 | (23)       | <i>Aquabacterium</i>   | M                  | (24)       |
| <i>Aquicella</i>          | A                  | (25)       | <i>Aquifex</i>          | M                  | (26)       | <i>Arcicella</i>       | A                  | (27)       |
| <i>Arcobacter</i>         | M                  | (28)       | <i>Arsenophonus</i>     | A                  | (29)       | <i>Arthrobacter</i>    | A                  | (30)       |
| <i>Asaia</i>              | A                  | (31)       | <i>Aurantimonas</i>     | A                  | (32)       | <i>Azoarcus</i>        | An                 | (33)       |
| <i>Azovibrio</i>          | M                  | (34)       | <i>Bacillus</i>         | A                  | (35)       | <i>Bacteroides</i>     | An                 | (36)       |
| <i>Barnesiella</i>        | An                 | (37)       | <i>Bartonella</i>       | A                  | (38)       | <i>Bdellovibrio</i>    | A                  | (39)       |
| <i>Bergeyella</i>         | A                  | (40)       | <i>Bifidobacterium</i>  | An                 | (41)       | <i>Blastococcus</i>    | A                  | (42)       |
| <i>Blastomonas</i>        | A                  | (43)       | <i>Bosea</i>            | A                  | (44)       | <i>Brachybacterium</i> | A                  | (45)       |
| <i>Brachymonas</i>        | A                  | (46)       | <i>Bradyrhizobium</i>   | A                  | (47)       | <i>Brenneria</i>       | F                  | (48)       |
| <i>Brevibacterium</i>     | A                  | (49)       | <i>Brevundimonas</i>    | A                  | (50)       | <i>Burkholderia</i>    | A                  | (51)       |
| <i>Caloramator</i>        | An                 | (52)       | <i>Carnobacterium</i>   | F                  | (53)       | <i>Catabacter</i>      | An                 | (54)       |
| <i>Caulobacter</i>        | A                  | (55)       | <i>Cedecea</i>          | A                  | (56)       | <i>Cellulomonas</i>    | A                  | (57)       |
| <i>Cellulosimicrobium</i> | A                  | (58)       | <i>Chelatococcus</i>    | A                  | (59)       | <i>Chitinophaga</i>    | A                  | (60)       |
| <i>Chroococciopsis</i>    | A                  | (61)       | <i>Chryseobacterium</i> | A                  | (62)       | <i>Citrobacter</i>     | A                  | (63)       |
| <i>Citromicrobium</i>     | A                  | (64)       | <i>Cloacibacterium</i>  | A                  | (65)       | <i>Clostridium</i>     | An                 | (66)       |

|                          |    |       |                                 |    |       |                         |    |       |
|--------------------------|----|-------|---------------------------------|----|-------|-------------------------|----|-------|
| <i>Cohnella</i>          | A  | (67)  | <i>Comamonas</i>                | A  | (68)  | <i>Coprobacillus</i>    | An | (69)  |
| <i>Corynebacterium</i>   | A  | (70)  | <i>Cronobacter</i>              | F  | (71)  | <i>Cryptosporangium</i> | A  | (72)  |
| <i>Cupriavidus</i>       | A  | (73)  | <i>Curtobacterium</i>           | A  | (74)  | <i>Curvibacter</i>      | A  | (75)  |
| <i>Cytophaga</i>         | F  | (76)  | <i>Deinococcus</i>              | A  | (77)  | <i>Delftia</i>          | A  | (78)  |
| <i>Dendrosporobacter</i> | An | (79)  | <i>Denitratisona</i>            | An | (80)  | <i>Dermacoccus</i>      | A  | (81)  |
| <i>Desemzia</i>          | M  | (82)  | <i>Desulfarculus</i>            | An | (83)  | <i>Desulfobacterium</i> | An | (84)  |
| <i>Desulfobulbus</i>     | An | (85)  | <i>Desulfomicrobium</i>         | An | (86)  | <i>Desulforegula</i>    | An | (87)  |
| <i>Desulfosarcina</i>    | An | (88)  | <i>Desulfosporosinus</i>        | An | (89)  | <i>Desulfotomaculum</i> | An | (90)  |
| <i>Desulfovibrio</i>     | An | (91)  | <i>Desulfurispora</i>           | An | (92)  | <i>Devosia</i>          | A  | (93)  |
| <i>Dietzia</i>           | A  | (94)  | <i>Dyella</i>                   | A  | (95)  | <i>Dysgonomonas</i>     | F  | (96)  |
| <i>Elizabethkingia</i>   | M  | (97)  | <i>Empedobacter</i>             | A  | (40)  | <i>Enhydrobacter</i>    | F  | (98)  |
| <i>Enterobacter</i>      | F  | (99)  | <i>Enterococcus</i>             | F  | (100) | <i>Erwinia</i>          | F  | (101) |
| <i>Erysipelothrix</i>    | A  | (102) | <i>Escherichia</i>              | F  | (103) | <i>Eubacterium</i>      | An | (104) |
| <i>Exiguobacterium</i>   | A  | (105) | <i>Faecalibacterium</i>         | An | (106) | <i>Flavisolibacter</i>  | A  | (107) |
| <i>Flavobacterium</i>    | A  | (108) | <i>Flexibacter</i>              | A  | (109) | <i>Flexithrix</i>       | A  | (110) |
| <i>Frateuria</i>         | A  | (111) | <i>Friedmanniella</i>           | A  | (112) | <i>Frigoribacterium</i> | A  | (113) |
| <i>Fusibacter</i>        | An | (114) | <i>Fusobacterium</i>            | An | (115) | <i>Gelria</i>           | An | (116) |
| <i>Gemella</i>           | F  | (117) | <i>Geobacillus</i>              | A  | (118) | <i>Geobacter</i>        | An | (119) |
| <i>Geodermatophilus</i>  | A  | (120) | <i>Gluconobacter</i>            | A  | (121) | <i>Gordonia</i>         | A  | (122) |
| <i>Granulicatella</i>    | F  | (123) | <i>Haemophilus</i>              | F  | (124) | <i>Hafnia</i>           | F  | (125) |
| <i>Halomonas</i>         | A  | (126) | <i>Helicobacter</i>             | M  | (127) | <i>Herbaspirillum</i>   | A  | (128) |
| <i>Humicoccus</i>        | A  | (129) | <i>Hydrogenoanaerobacterium</i> | An | (130) | <i>Hymenobacter</i>     | A  | (131) |
| <i>Hyphomicrobium</i>    | A  | (132) | <i>Ignatzschineria</i>          | A  | (133) | <i>Ignavigranum</i>     | F  | (134) |
| <i>Inquilinus</i>        | A  | (135) | <i>Isobaculum</i>               | F  | (136) | <i>Janibacter</i>       | A  | (137) |
| <i>Janthinobacterium</i> | A  | (138) | <i>Kineococcus</i>              | A  | (139) | <i>Kineosporia</i>      | A  | (140) |
| <i>Kingella</i>          | A  | (141) | <i>Klebsiella</i>               | F  | (142) | <i>Kocuria</i>          | A  | (143) |
| <i>Kurthia</i>           | A  | (144) | <i>Labeledella</i>              | A  | (145) | <i>Labrys</i>           | A  | (146) |

|                          |    |       |                         |    |       |                           |    |       |
|--------------------------|----|-------|-------------------------|----|-------|---------------------------|----|-------|
| <i>Lactobacillus</i>     | F  | (147) | <i>Lactococcus</i>      | A  | (148) | <i>Lechevalieria</i>      | A  | (149) |
| <i>Leclercia</i>         | A  | (150) | <i>Legionella</i>       | A  | (151) | <i>Leifsonia</i>          | A  | (152) |
| <i>Lentzea</i>           | A  | (153) | <i>Leptolyngbya</i>     | A  | (154) | <i>Leptothrix</i>         | A  | (155) |
| <i>Leptotrichia</i>      | An | (156) | <i>Leucobacter</i>      | A  | (157) | <i>Leuconostoc</i>        | F  | (158) |
| <i>Lutispora</i>         | An | (159) | <i>Lysinibacillus</i>   | A  | (160) | <i>Macrococcus</i>        | F  | (161) |
| <i>Marmoricola</i>       | A  | (162) | <i>Massilia</i>         | A  | (163) | <i>Megasphaera</i>        | An | (164) |
| <i>Mesorhizobium</i>     | A  | (165) | <i>Methylobacterium</i> | A  | (166) | <i>Methylocaldum</i>      | A  | (167) |
| <i>Methylomonas</i>      | A  | (168) | <i>Methylophilus</i>    | A  | (169) | <i>Microbacterium</i>     | A  | (170) |
| <i>Micrococcus</i>       | A  | (171) | <i>Microlunatus</i>     | A  | (172) | <i>Mitsuaria</i>          | A  | (173) |
| <i>Moellerella</i>       | A  | (174) | <i>Moraxella</i>        | A  | (175) | <i>Morganella</i>         | A  | (176) |
| <i>Mycobacterium</i>     | A  | (177) | <i>Mycoplasma</i>       | F  | (178) | <i>Myroides</i>           | A  | (179) |
| <i>Natronocella</i>      | An | (180) | <i>Neisseria</i>        | A  | (181) | <i>Nitratiruptor</i>      | F  | (182) |
| <i>Nocardioides</i>      | A  | (183) | <i>Nocardiosis</i>      | A  | (184) | <i>Novosphingobium</i>    | A  | (185) |
| <i>Obesumbacterium</i>   | A  | (186) | <i>Oceanimonas</i>      | A  | (187) | <i>Ochrobactrum</i>       | A  | (188) |
| <i>Odoribacter</i>       | An | (189) | <i>Oribacterium</i>     | An | (190) | <i>Oscillospira</i>       | An | (191) |
| <i>Oxalobacter</i>       | An | (192) | <i>Paenibacillus</i>    | F  | (193) | <i>Paludibacter</i>       | An | (194) |
| <i>Pandoraea</i>         | A  | (195) | <i>Pantoea</i>          | F  | (196) | <i>Parabacteroides</i>    | An | (197) |
| <i>Paralactobacillus</i> | A  | (198) | <i>Patulibacter</i>     | A  | (199) | <i>Pectobacterium</i>     | F  | (200) |
| <i>Pedobacter</i>        | A  | (201) | <i>Pedomicrobium</i>    | A  | (202) | <i>Pelomonas</i>          | A  | (203) |
| <i>Pelotomaculum</i>     | An | (204) | <i>Peptoniphilus</i>    | An | (205) | <i>Peptostreptococcus</i> | An | (206) |
| <i>Petrimonas</i>        | An | (207) | <i>Petrobacter</i>      | A  | (208) | <i>Photorhabdus</i>       | F  | (209) |
| <i>Planifilum</i>        | A  | (210) | <i>Pleurocapsa</i>      | A  | (211) | <i>Polynucleobacter</i>   | A  | (212) |
| <i>Ponticoccus</i>       | A  | (213) | <i>Porphyromonas</i>    | An | (214) | <i>Prevotella</i>         | An | (215) |
| <i>Propionibacterium</i> | An | (216) | <i>Propionivibrio</i>   | An | (217) | <i>Prosthecomicrobium</i> | A  | (218) |
| <i>Proteus</i>           | F  | (219) | <i>Providencia</i>      | A  | (220) | <i>Pseudoclavibacter</i>  | A  | (221) |
| <i>Pseudomonas</i>       | A  | (222) | <i>Pseudonocardia</i>   | A  | (223) | <i>Psychrobacter</i>      | A  | (224) |
| <i>Quadrisphaera</i>     | A  | (225) | <i>Rahnella</i>         | A  | (226) | <i>Ralstonia</i>          | A  | (227) |



|                          |    |       |                         |    |       |                           |    |       |
|--------------------------|----|-------|-------------------------|----|-------|---------------------------|----|-------|
| <i>Rathayibacter</i>     | A  | (228) | <i>Rhizobium</i>        | A  | (229) | <i>Rhodoblastus</i>       | An | (230) |
| <i>Rhodococcus</i>       | A  | (231) | <i>Rhodoplanes</i>      | F  | (232) | <i>Rhodopseudomonas</i>   | A  | (233) |
| <i>Rhodospirillum</i>    | F  | (234) | <i>Rickettsia</i>       | A  | (235) | <i>Roseburia</i>          | An | (236) |
| <i>Rothia</i>            | A  | (237) | <i>Rubellimicrobium</i> | A  | (238) | <i>Rubroacter</i>         | A  | (239) |
| <i>Ruminococcus</i>      | An | (240) | <i>Saccharibacter</i>   | A  | (241) | <i>Saccharopolyspora</i>  | A  | (242) |
| <i>Salmonella</i>        | F  | (243) | <i>Sanguibacter</i>     | F  | (244) | <i>Saprospira</i>         | A  | (245) |
| <i>Schlegelella</i>      | A  | (246) | <i>Sebaldella</i>       | An | (247) | <i>Sedimentibacter</i>    | An | (248) |
| <i>Segetibacter</i>      | A  | (249) | <i>Sejongia</i>         | A  | (250) | <i>Serratia</i>           | F  | (251) |
| <i>Shewanella</i>        | F  | (252) | <i>Sodalis</i>          | M  | (253) | <i>Solimonas</i>          | A  | (254) |
| <i>Solirubrobacter</i>   | A  | (255) | <i>Sorangium</i>        | A  | (256) | <i>Sphingobacterium</i>   | A  | (257) |
| <i>Sphingobium</i>       | A  | (185) | <i>Sphingomonas</i>     | A  | (258) | <i>Spirochaeta</i>        | An | (259) |
| <i>Spiroplasma</i>       | F  | (260) | <i>Spirosoma</i>        | A  | (261) | <i>Sporichthya</i>        | A  | (262) |
| <i>Sporobacter</i>       | An | (263) | <i>Sporomusa</i>        | An | (264) | <i>Sporosarcina</i>       | A  | (265) |
| <i>Staphylococcus</i>    | F  | (266) | <i>Stenotrophomonas</i> | A  | (267) | <i>Streptococcus</i>      | F  | (268) |
| <i>Streptomyces</i>      | A  | (269) | <i>Succinispira</i>     | An | (270) | <i>Sulfurospirillum</i>   | M  | (271) |
| <i>Symphyonemopsis</i>   | A  | (272) | <i>Symploca</i>         | F  | (273) | <i>Synechococcus</i>      | A  | (274) |
| <i>Syntrophomonas</i>    | An | (275) | <i>Telmatospirillum</i> | F  | (276) | <i>Tepidimicrobium</i>    | An | (277) |
| <i>Terrimonas</i>        | A  | (278) | <i>Thauera</i>          | An | (279) | <i>Thermanaerovibrio</i>  | An | (280) |
| <i>Thermicanus</i>       | M  | (281) | <i>Thermincola</i>      | An | (282) | <i>Thermoanaerobacter</i> | An | (283) |
| <i>Thermodesulfobium</i> | An | (284) | <i>Thermomonas</i>      | A  | (285) | <i>Thioalkalivibrio</i>   | F  | (286) |
| <i>Thiohalocapsa</i>     | An | (287) | <i>Thiothrix</i>        | A  | (288) | <i>Treponema</i>          | An | (289) |
| <i>Tsukamurella</i>      | A  | (290) | <i>Vagococcus</i>       | F  | (291) | <i>Variovorax</i>         | A  | (292) |
| <i>Veillonella</i>       | An | (293) | <i>Weissella</i>        | F  | (294) | <i>Williamsia</i>         | A  | (295) |
| <i>Wolbachia</i>         | A  | (296) | <i>Xanthomonas</i>      | A  | (297) | <i>Yersinia</i>           | F  | (298) |
| <i>Zoogloea</i>          | F  | (299) | <i>Zooshikella</i>      | A  | (300) | <i>Zymbacter</i>          | F  | (301) |

**Supplementary Table S4.** Detailed comparisons of bacterial community among the factors: environmental habit, diet, developmental stage, and host phylogeny. The classified groups: fungivore and no-feed (according to diet type) and the insect orders containing <5 samples (phylogenetic position of insect hosts), were not included for the statistical analyses due to low sampling depth. Significant at the  $P \leq 0.05$  alpha level.

| Comparison          |              |               | Dissimilarity in community membership |         |       | Jclass calculator |         |                    |          |                  |          | Thetayc calculator |        |                    |         |                  |         |       |         |       |        |
|---------------------|--------------|---------------|---------------------------------------|---------|-------|-------------------|---------|--------------------|----------|------------------|----------|--------------------|--------|--------------------|---------|------------------|---------|-------|---------|-------|--------|
|                     |              |               | Dissimilarity in community structure  |         | Fs    | ANOSIM            |         | UniFrac-unweighted |          | UniFrac-weighted |          | ANOSIM             |        | UniFrac-unweighted |         | UniFrac-weighted |         |       |         |       |        |
|                     |              |               | Jaccard                               | Thetayc |       | Braycurtis        | R-value | P-value            | UW Score | UWSig            | UW Score | UWSig              | Fs     | P-value            | R-value | P-value          | UWScore | UWSig | UWScore | UWSig |        |
| Environmental Niche | Aquatic      | Terrestrial   | 0.997                                 | 0.974   | 0.988 | 1.055             | 0.013   | 0.044              | 0.290    | 1.000            | <0.001   | 0.994              | <0.001 | 1.322              | 0.020   | 0.045            | 0.258   | 0.994 | <0.001  | 0.495 | <0.001 |
| Developmental stage | Larva        | Adult         | 0.984                                 | 0.850   | 0.905 | 1.146             | <0.001  | -0.039             | 0.880    | 0.998            | <0.001   | 0.988              | <0.001 | 1.615              | <0.001  | -0.039           | 0.902   | 0.961 | <0.001  | 0.450 | <0.001 |
| Diet                | Total groups |               | -                                     | -       | -     | 1.056             | <0.001  | -0.025             | 0.807    | 0.997            | <0.001   | -                  | -      | 1.385              | <0.001  | -0.031           | 0.867   | 0.959 | <0.001  | -     | -      |
|                     | Carnivore    | Herbivore     | 0.988                                 | 0.736   | 0.887 | 1.091             | 0.001   | -                  | -        | -                | -        | 0.988              | <0.001 | 1.670              | <0.001  | -                | -       | -     | -       | 0.894 | <0.001 |
|                     | Carnivore    | Omnivore      | 0.986                                 | 0.735   | 0.894 | 1.038             | 0.017   | -                  | -        | -                | -        | 0.991              | <0.001 | 1.116              | 0.161   | -                | -       | -     | -       | 0.905 | <0.001 |
|                     | Carnivore    | Scavenger     | 0.993                                 | 0.917   | 0.937 | 1.010             | 0.230   | -                  | -        | -                | -        | 0.993              | <0.001 | 1.184              | 0.066   | -                | -       | -     | -       | 0.963 | <0.001 |
|                     | Herbivore    | Omnivore      | 0.988                                 | 0.832   | 0.943 | 1.070             | 0.010   | -                  | -        | -                | -        | 0.992              | <0.001 | 1.369              | 0.006   | -                | -       | -     | -       | 0.950 | <0.001 |
|                     | Herbivore    | Scavenger     | 0.994                                 | 0.927   | 0.968 | 1.030             | 0.095   | -                  | -        | -                | -        | 0.993              | <0.001 | 1.285              | 0.023   | -                | -       | -     | -       | 0.975 | <0.001 |
|                     | Omnivore     | Scavenger     | 0.990                                 | 0.921   | 0.942 | 1.024             | 0.091   | -                  | -        | -                | -        | 0.994              | <0.001 | 1.187              | 0.028   | -                | -       | -     | -       | 0.972 | <0.001 |
| Phylogenetic type   | Total groups |               | -                                     | -       | -     | 1.130             | <0.001  | 0.082              | <0.001   | 0.996            | <0.001   | -                  | -      | 1.727              | <0.001  | 0.088            | <0.001  | 0.931 | <0.001  | -     | -      |
|                     | Blattaria    | Coleoptera    | 0.997                                 | 0.995   | 0.992 | 1.069             | 0.007   | 0.196              | 0.078    | -                | -        | 1.000              | <0.001 | 1.396              | 0.001   | 0.178            | 0.094   | -     | -       | 0.998 | <0.001 |
|                     | Blattaria    | Dermaptera    | 0.996                                 | 0.983   | 0.976 | 1.093             | 0.010   | 0.564              | 0.001    | -                | -        | 1.000              | 0.002  | 1.307              | 0.020   | 0.507            | 0.001   | -     | -       | 0.983 | <0.001 |
|                     | Blattaria    | Diptera       | 0.999                                 | 1.000   | 0.998 | 1.065             | 0.005   | 0.406              | <0.001   | -                | -        | 0.964              | <0.001 | 1.446              | 0.008   | 0.412            | <0.001  | -     | -       | 0.999 | <0.001 |
|                     | Blattaria    | Ephemeroptera | 0.990                                 | 0.996   | 0.987 | 1.147             | 0.003   | 0.561              | 0.001    | -                | -        | 1.000              | 0.002  | 1.435              | 0.012   | 0.515            | <0.001  | -     | -       | 0.998 | <0.001 |
|                     | Blattaria    | Hemiptera     | 0.999                                 | 0.996   | 0.997 | 1.063             | 0.004   | 0.259              | 0.016    | -                | -        | 1.000              | <0.001 | 1.473              | 0.012   | 0.258            | 0.020   | -     | -       | 0.995 | <0.001 |
|                     | Blattaria    | Hymenoptera   | 0.997                                 | 0.995   | 0.993 | 1.175             | 0.003   | 0.422              | <0.001   | -                | -        | 1.000              | <0.001 | 2.150              | 0.001   | 0.399            | 0.001   | -     | -       | 0.996 | <0.001 |
|                     | Blattaria    | Lepidoptera   | 0.998                                 | 0.996   | 0.996 | 1.086             | 0.002   | 0.410              | <0.001   | -                | -        | 1.000              | <0.001 | 1.461              | 0.001   | 0.394            | <0.001  | -     | -       | 0.997 | <0.001 |
|                     | Blattaria    | Mantodea      | 0.999                                 | 0.998   | 0.995 | 1.037             | 0.001   | 0.400              | 0.018    | -                | -        | 1.000              | <0.001 | 1.261              | 0.005   | 0.360            | 0.011   | -     | -       | 0.999 | <0.001 |
|                     | Blattaria    | Megaloptera   | 0.997                                 | 0.998   | 0.993 | 1.080             | 0.023   | 0.539              | 0.004    | -                | -        | 1.000              | <0.001 | 1.620              | 0.009   | 0.661            | 0.001   | -     | -       | 0.999 | <0.001 |
|                     | Blattaria    | Neuroptera    | 0.987                                 | 0.991   | 0.986 | 1.082             | 0.001   | 0.484              | 0.002    | -                | -        | 1.000              | <0.001 | 1.261              | 0.003   | 0.395            | 0.002   | -     | -       | 0.996 | <0.001 |
|                     | Blattaria    | Odonata       | 0.999                                 | 0.999   | 0.997 | 1.042             | <0.001  | 0.254              | 0.002    | -                | -        | 1.000              | <0.001 | 1.331              | 0.010   | 0.247            | 0.007   | -     | -       | 0.999 | <0.001 |
|                     | Blattaria    | Orthoptera    | 0.995                                 | 0.998   | 0.994 | 1.071             | 0.005   | 0.436              | <0.001   | -                | -        | 1.000              | <0.001 | 1.416              | 0.003   | 0.434            | 0.003   | -     | -       | 0.999 | <0.001 |
|                     | Coleoptera   | Dermaptera    | 0.985                                 | 0.930   | 0.953 | 1.078             | 0.002   | -0.052             | 0.668    | -                | -        | 0.996              | <0.001 | 1.180              | 0.032   | -0.051           | 0.668   | -     | -       | 0.981 | <0.001 |
|                     | Coleoptera   | Diptera       | 0.993                                 | 0.924   | 0.929 | 1.045             | 0.026   | 0.025              | 0.228    | -                | -        | 0.957              | <0.001 | 1.310              | 0.004   | 0.013            | 0.332   | -     | -       | 0.950 | <0.001 |
|                     | Coleoptera   | Ephemeroptera | 0.992                                 | 0.971   | 0.914 | 1.068             | 0.026   | -0.218             | 0.975    | -                | -        | 0.988              | <0.001 | 1.120              | 0.087   | -0.185           | 0.937   | -     | -       | 0.964 | <0.001 |
|                     | Coleoptera   | Hemiptera     | 0.989                                 | 0.962   | 0.920 | 1.069             | 0.002   | -0.005             | 0.569    | -                | -        | 0.992              | <0.001 | 1.503              | <0.001  | -0.007           | 0.637   | -     | -       | 0.944 | <0.001 |
|                     | Coleoptera   | Hymenoptera   | 0.987                                 | 0.912   | 0.899 | 1.464             | <0.001  | 0.124              | <0.001   | -                | -        | 0.989              | <0.001 | 4.051              | <0.001  | 0.136            | <0.001  | -     | -       | 0.945 | <0.001 |
|                     | Coleoptera   | Lepidoptera   | 0.986                                 | 0.930   | 0.875 | 1.036             | 0.050   | 0.037              | 0.004    | -                | -        | 0.988              | <0.001 | 1.139              | 0.103   | 0.035            | 0.005   | -     | -       | 0.897 | <0.001 |
|                     | Coleoptera   | Mantodea      | 0.995                                 | 0.944   | 0.950 | 1.029             | 0.095   | 0.059              | 0.301    | -                | -        | 0.997              | <0.001 | 1.043              | 0.233   | 0.034            | 0.369   | -     | -       | 0.974 | <0.001 |
|                     | Coleoptera   | Megaloptera   | 0.989                                 | 0.924   | 0.948 | 1.073             | 0.010   | -0.058             | 0.666    | -                | -        | 0.995              | <0.001 | 1.535              | 0.003   | -0.067           | 0.713   | -     | -       | 0.976 | <0.001 |
|                     | Coleoptera   | Neuroptera    | 0.992                                 | 0.906   | 0.933 | 0.986             | 0.725   | -0.153             | 0.903    | -                | -        | 0.990              | <0.001 | 0.876              | 0.948   | -0.126           | 0.855   | -     | -       | 0.954 | <0.001 |
|                     | Coleoptera   | Odonata       | 0.993                                 | 0.913   | 0.934 | 1.052             | 0.011   | 0.072              | 0.183    | -                | -        | 0.996              | <0.001 | 1.019              | 0.404   | 0.045            | 0.271   | -     | -       | 0.929 | <0.001 |

|               |               |       |       |       |       |        |        |        |   |   |       |        |       |        |        |        |   |   |       |        |
|---------------|---------------|-------|-------|-------|-------|--------|--------|--------|---|---|-------|--------|-------|--------|--------|--------|---|---|-------|--------|
| Coleoptera    | Orthoptera    | 0.988 | 0.846 | 0.913 | 1.092 | <0.001 | -0.001 | 0.474  | - | - | 0.996 | <0.001 | 1.161 | 0.046  | -0.012 | 0.591  | - | - | 0.914 | <0.001 |
| Dermaptera    | Diptera       | 0.995 | 0.961 | 0.971 | 1.090 | <0.001 | -0.031 | 0.591  | - | - | 0.963 | <0.001 | 1.266 | 0.022  | -0.018 | 0.558  | - | - | 0.993 | <0.001 |
| Dermaptera    | Ephemeroptera | 0.973 | 0.984 | 0.934 | 1.091 | 0.008  | 0.095  | 0.101  | - | - | 0.995 | <0.001 | 1.248 | 0.026  | 0.119  | 0.070  | - | - | 0.985 | <0.001 |
| Dermaptera    | Hemiptera     | 0.992 | 0.981 | 0.967 | 1.088 | 0.003  | -0.130 | 0.901  | - | - | 0.996 | <0.001 | 1.329 | 0.026  | -0.120 | 0.903  | - | - | 0.987 | <0.001 |
| Dermaptera    | Hymenoptera   | 0.984 | 0.941 | 0.956 | 1.203 | <0.001 | 0.070  | 0.229  | - | - | 0.996 | <0.001 | 2.178 | 0.003  | 0.094  | 0.159  | - | - | 0.987 | <0.001 |
| Dermaptera    | Lepidoptera   | 0.989 | 0.965 | 0.962 | 1.090 | 0.001  | 0.011  | 0.447  | - | - | 0.996 | <0.001 | 1.279 | 0.023  | 0.003  | 0.477  | - | - | 0.981 | <0.001 |
| Dermaptera    | Mantodea      | 0.994 | 0.926 | 0.956 | 1.058 | 0.027  | 0.272  | 0.016  | - | - | 0.997 | <0.001 | 1.046 | 0.321  | 0.226  | 0.022  | - | - | 0.947 | <0.001 |
| Dermaptera    | Megaloptera   | 0.977 | 0.940 | 0.948 | 1.075 | 0.028  | 0.234  | 0.026  | - | - | 0.996 | <0.001 | 1.465 | 0.002  | 0.324  | 0.002  | - | - | 0.985 | <0.001 |
| Dermaptera    | Neuroptera    | 0.953 | 0.950 | 0.922 | 1.032 | 0.116  | 0.041  | 0.243  | - | - | 0.995 | <0.001 | 1.089 | 0.081  | 0.072  | 0.215  | - | - | 0.988 | <0.001 |
| Dermaptera    | Odonata       | 0.994 | 0.927 | 0.941 | 1.080 | 0.001  | 0.075  | 0.148  | - | - | 0.997 | <0.001 | 1.072 | 0.218  | 0.051  | 0.250  | - | - | 0.961 | <0.001 |
| Dermaptera    | Orthoptera    | 0.987 | 0.928 | 0.928 | 1.074 | 0.001  | -0.008 | 0.524  | - | - | 0.997 | <0.001 | 1.009 | 0.438  | -0.035 | 0.622  | - | - | 0.946 | <0.001 |
| Diptera       | Ephemeroptera | 0.997 | 0.996 | 0.969 | 1.146 | <0.001 | -0.152 | 0.926  | - | - | 0.961 | <0.001 | 1.396 | 0.017  | -0.080 | 0.787  | - | - | 0.993 | <0.001 |
| Diptera       | Hemiptera     | 0.996 | 0.991 | 0.961 | 1.064 | 0.001  | 0.038  | 0.106  | - | - | 0.960 | <0.001 | 1.744 | <0.001 | 0.054  | 0.047  | - | - | 0.974 | <0.001 |
| Diptera       | Hymenoptera   | 0.991 | 0.785 | 0.916 | 1.402 | <0.001 | 0.219  | <0.001 | - | - | 0.957 | <0.001 | 3.270 | <0.001 | 0.212  | <0.001 | - | - | 0.936 | <0.001 |
| Diptera       | Lepidoptera   | 0.992 | 0.862 | 0.892 | 1.037 | 0.051  | 0.046  | 0.100  | - | - | 0.955 | <0.001 | 1.486 | 0.001  | 0.037  | 0.125  | - | - | 0.923 | <0.001 |
| Diptera       | Mantodea      | 0.999 | 0.990 | 0.984 | 1.027 | 0.056  | 0.151  | 0.078  | - | - | 0.962 | <0.001 | 1.176 | 0.054  | 0.191  | 0.012  | - | - | 0.983 | <0.001 |
| Diptera       | Megaloptera   | 0.997 | 0.986 | 0.978 | 1.076 | 0.003  | 0.015  | 0.415  | - | - | 0.963 | <0.001 | 1.685 | 0.001  | 0.076  | 0.175  | - | - | 0.994 | <0.001 |
| Diptera       | Neuroptera    | 0.997 | 0.976 | 0.961 | 1.041 | 0.035  | -0.099 | 0.839  | - | - | 0.962 | <0.001 | 1.106 | 0.183  | -0.029 | 0.625  | - | - | 0.985 | <0.001 |
| Diptera       | Odonata       | 0.997 | 0.778 | 0.935 | 1.008 | 0.278  | 0.057  | 0.134  | - | - | 0.960 | <0.001 | 1.171 | 0.067  | 0.085  | 0.043  | - | - | 0.945 | <0.001 |
| Diptera       | Orthoptera    | 0.995 | 0.914 | 0.953 | 1.058 | 0.002  | 0.045  | 0.048  | - | - | 0.958 | <0.001 | 1.280 | 0.024  | 0.046  | 0.054  | - | - | 0.921 | <0.001 |
| Ephemeroptera | Hemiptera     | 0.994 | 0.983 | 0.965 | 1.135 | <0.001 | -0.295 | 0.998  | - | - | 0.995 | <0.001 | 1.439 | 0.011  | -0.239 | 0.987  | - | - | 0.998 | <0.001 |
| Ephemeroptera | Hymenoptera   | 0.985 | 0.974 | 0.930 | 1.160 | 0.007  | -0.095 | 0.780  | - | - | 0.993 | <0.001 | 1.923 | 0.009  | -0.025 | 0.520  | - | - | 0.983 | <0.001 |
| Ephemeroptera | Lepidoptera   | 0.990 | 0.987 | 0.932 | 1.093 | 0.005  | -0.172 | 0.953  | - | - | 0.991 | <0.001 | 1.096 | 0.197  | -0.136 | 0.886  | - | - | 0.966 | <0.001 |
| Ephemeroptera | Mantodea      | 0.993 | 0.996 | 0.986 | 1.118 | 0.011  | 0.284  | 0.004  | - | - | 0.998 | <0.001 | 1.251 | 0.018  | 0.274  | 0.001  | - | - | 0.999 | <0.001 |
| Ephemeroptera | Megaloptera   | 0.983 | 0.994 | 0.974 | 1.110 | 0.021  | 0.198  | 0.032  | - | - | 0.993 | <0.001 | 1.627 | 0.001  | 0.390  | 0.005  | - | - | 0.999 | <0.001 |
| Ephemeroptera | Neuroptera    | 0.977 | 0.974 | 0.889 | 0.992 | 0.537  | -0.025 | 0.682  | - | - | 0.981 | <0.001 | 1.054 | 0.233  | 0.028  | 0.287  | - | - | 0.981 | <0.001 |
| Ephemeroptera | Odonata       | 0.995 | 0.995 | 0.979 | 1.170 | <0.001 | -0.022 | 0.570  | - | - | 0.998 | <0.001 | 1.325 | 0.003  | -0.034 | 0.609  | - | - | 0.999 | <0.001 |
| Ephemeroptera | Orthoptera    | 0.991 | 0.992 | 0.956 | 1.179 | <0.001 | -0.025 | 0.560  | - | - | 0.998 | <0.001 | 1.397 | 0.002  | 0.048  | 0.339  | - | - | 0.995 | <0.001 |
| Hemiptera     | Hymenoptera   | 0.991 | 0.985 | 0.950 | 1.519 | <0.001 | 0.170  | <0.001 | - | - | 0.993 | <0.001 | 4.730 | <0.001 | 0.186  | <0.001 | - | - | 0.980 | <0.001 |
| Hemiptera     | Lepidoptera   | 0.993 | 0.989 | 0.951 | 1.099 | 0.001  | 0.050  | 0.008  | - | - | 0.994 | <0.001 | 1.870 | <0.001 | 0.061  | 0.003  | - | - | 0.972 | <0.001 |
| Hemiptera     | Mantodea      | 0.998 | 0.982 | 0.979 | 1.016 | 0.156  | 0.029  | 0.388  | - | - | 0.997 | <0.001 | 1.144 | 0.147  | 0.021  | 0.421  | - | - | 0.984 | <0.001 |
| Hemiptera     | Megaloptera   | 0.992 | 0.983 | 0.974 | 1.069 | 0.005  | -0.118 | 0.866  | - | - | 0.997 | <0.001 | 1.673 | 0.004  | -0.090 | 0.792  | - | - | 0.984 | <0.001 |
| Hemiptera     | Neuroptera    | 0.995 | 0.860 | 0.955 | 1.029 | 0.062  | -0.196 | 0.972  | - | - | 0.994 | <0.001 | 0.931 | 0.648  | -0.169 | 0.958  | - | - | 0.927 | <0.001 |
| Hemiptera     | Odonata       | 0.996 | 0.978 | 0.961 | 1.016 | 0.142  | 0.030  | 0.284  | - | - | 0.994 | <0.001 | 1.066 | 0.292  | 0.025  | 0.296  | - | - | 0.899 | <0.001 |
| Hemiptera     | Orthoptera    | 0.994 | 0.955 | 0.945 | 1.070 | 0.003  | 0.002  | 0.420  | - | - | 0.995 | <0.001 | 1.412 | 0.014  | 0.008  | 0.341  | - | - | 0.934 | <0.001 |
| Hymenoptera   | Lepidoptera   | 0.984 | 0.835 | 0.874 | 1.520 | <0.001 | 0.156  | <0.001 | - | - | 0.991 | <0.001 | 4.339 | <0.001 | 0.162  | <0.001 | - | - | 0.928 | <0.001 |
| Hymenoptera   | Mantodea      | 0.998 | 0.996 | 0.990 | 1.156 | 0.004  | 0.353  | 0.002  | - | - | 0.998 | <0.001 | 1.978 | 0.009  | 0.385  | 0.001  | - | - | 0.999 | <0.001 |
| Hymenoptera   | Megaloptera   | 0.993 | 0.992 | 0.981 | 1.194 | 0.001  | 0.160  | 0.072  | - | - | 0.996 | <0.001 | 2.677 | <0.001 | 0.221  | 0.022  | - | - | 0.999 | <0.001 |
| Hymenoptera   | Neuroptera    | 0.992 | 0.962 | 0.952 | 1.111 | 0.009  | 0.052  | 0.311  | - | - | 0.994 | <0.001 | 1.876 | 0.013  | 0.126  | 0.104  | - | - | 0.983 | <0.001 |
| Hymenoptera   | Odonata       | 0.994 | 0.657 | 0.941 | 1.275 | <0.001 | 0.348  | <0.001 | - | - | 0.993 | <0.001 | 2.531 | 0.001  | 0.354  | <0.001 | - | - | 0.916 | <0.001 |
| Hymenoptera   | Orthoptera    | 0.990 | 0.906 | 0.938 | 1.467 | <0.001 | 0.280  | <0.001 | - | - | 0.995 | <0.001 | 3.375 | <0.001 | 0.282  | <0.001 | - | - | 0.944 | <0.001 |
| Lepidoptera   | Mantodea      | 0.997 | 0.985 | 0.977 | 1.040 | 0.039  | 0.202  | 0.028  | - | - | 0.998 | <0.001 | 1.156 | 0.093  | 0.203  | 0.024  | - | - | 0.986 | <0.001 |
| Lepidoptera   | Megaloptera   | 0.992 | 0.972 | 0.964 | 1.072 | 0.002  | -0.034 | 0.633  | - | - | 0.997 | <0.001 | 1.659 | 0.004  | -0.041 | 0.649  | - | - | 0.993 | <0.001 |
| Lepidoptera   | Neuroptera    | 0.993 | 0.922 | 0.946 | 1.007 | 0.332  | -0.107 | 0.845  | - | - | 0.993 | <0.001 | 0.938 | 0.697  | -0.078 | 0.764  | - | - | 0.962 | <0.001 |
| Lepidoptera   | Odonata       | 0.991 | 0.826 | 0.926 | 1.049 | 0.017  | 0.146  | 0.021  | - | - | 0.995 | <0.001 | 1.201 | 0.068  | 0.120  | 0.037  | - | - | 0.946 | <0.001 |
| Lepidoptera   | Orthoptera    | 0.985 | 0.920 | 0.925 | 1.073 | 0.003  | 0.039  | 0.184  | - | - | 0.994 | <0.001 | 1.379 | 0.002  | 0.042  | 0.138  | - | - | 0.952 | <0.001 |
| Mantodea      | Megaloptera   | 0.994 | 0.911 | 0.951 | 1.040 | 0.093  | 0.135  | 0.115  | - | - | 0.998 | <0.001 | 1.297 | 0.069  | 0.210  | 0.044  | - | - | 0.938 | <0.001 |
| Mantodea      | Neuroptera    | 0.995 | 0.965 | 0.949 | 1.023 | 0.146  | 0.076  | 0.185  | - | - | 0.995 | <0.001 | 0.948 | 0.657  | -0.038 | 0.614  | - | - | 0.962 | <0.001 |
| Mantodea      | Odonata       | 0.997 | 0.939 | 0.956 | 0.992 | 0.720  | -0.080 | 0.813  | - | - | 0.994 | <0.001 | 0.932 | 0.564  | -0.091 | 0.828  | - | - | 0.930 | <0.001 |
| Mantodea      | Orthoptera    | 0.996 | 0.976 | 0.981 | 1.026 | 0.064  | 0.203  | 0.057  | - | - | 0.996 | <0.001 | 1.119 | 0.102  | 0.195  | 0.060  | - | - | 0.975 | <0.001 |
| Megaloptera   | Neuroptera    | 0.987 | 0.939 | 0.936 | 1.035 | 0.150  | 0.069  | 0.199  | - | - | 0.992 | <0.001 | 1.275 | 0.072  | 0.125  | 0.088  | - | - | 0.997 | <0.001 |
| Megaloptera   | Odonata       | 0.995 | 0.957 | 0.944 | 1.061 | 0.003  | -0.042 | 0.657  | - | - | 0.998 | <0.001 | 1.323 | 0.044  | -0.021 | 0.570  | - | - | 0.923 | <0.001 |
| Megaloptera   | Orthoptera    | 0.992 | 0.970 | 0.969 | 1.085 | 0.001  | 0.056  | 0.251  | - | - | 0.998 | <0.001 | 1.581 | <0.001 | 0.099  | 0.153  | - | - | 0.977 | <0.001 |
| Neuroptera    | Odonata       | 0.994 | 0.942 | 0.929 | 1.051 | 0.004  | -0.090 | 0.833  | - | - | 0.994 | <0.001 | 0.865 | 0.798  | 0.023  | 0.824  | - | - | 0.894 | <0.001 |
| Neuroptera    | Orthoptera    | 0.989 | 0.905 | 0.928 | 1.057 | 0.008  | -0.026 | 0.564  | - | - | 0.997 | <0.001 | 0.974 | 0.558  | -0.090 | 0.375  | - | - | 0.961 | <0.001 |
| Odonata       | Orthoptera    | 0.992 | 0.839 | 0.896 | 1.011 | 0.206  | 0.072  | 0.077  | - | - | 0.995 | <0.001 | 0.877 | 0.791  | 0.069  | 0.095  | - | - | 0.870 | <0.001 |

## References

1. **Kawamura Y, Hou XG, Sultana F, Liu S, Yamamoto H, Ezaki T.** 1995. Transfer of *Streptococcus adjacens* and *Streptococcus defectivus* to *Abiotrophia* gen. nov. as *Abiotrophia adiacens* comb. nov. and *Abiotrophia defectiva* comb. nov., respectively. *Int. J. Syst. Bacteriol.* **45**:798-803.
2. **Cleenwerck I, Vandemeulebroecke K, Janssens D, Swings J.** 2002. Re-examination of the genus *Acetobacter*, with descriptions of *Acetobacter cerevisiae* sp. nov. and *Acetobacter malorum* sp. nov. *Int. J. Syst. Evol. Microbiol.* **52**:1551-1558.
3. **Simankova MV, Kotsyurbenko OR, Stackebrandt E, Kostrikina NA, Lysenko AM, Osipov GA, Nozhevnikova AN.** 2000. *Acetobacterium tundrae* sp nov, a new psychrophilic acetogenic bacterium from tundra soil. *Arch Microbiol* **174**:440-447.
4. **Tully JG, Whitcomb RF, Rose DL, Bove JM, Carle P, Somerson NL, Williamson DL, Eden-Green S.** 1994. *Acholeplasma brassicae* sp. nov. and *Acholeplasma palmae* sp. nov., two non-sterol-requiring mollicutes from plant surfaces. *Int. J. Syst. Bacteriol.* **44**:680-684.
5. **Hiraishi A, Matsuzawa Y, Kanbe T, Wakao N.** 2000. *Acidisphaera rubrifaciens* gen. nov., sp. nov., an aerobic bacteriochlorophyll-containing bacterium isolated from acidic environments. *Int. J. Syst. Evol. Microbiol.* **50**:1539-1546.
6. **Willems A, Falsen E, Pot B, Jantzen E, Hoste B, Vandamme P, Gillis M, Kersters K, De Ley J.** 1990. *Acidovorax*, a new genus for *Pseudomonas facilis*, *Pseudomonas delafieldii*, E. Falsen (EF) group 13, EF group 16, and several clinical isolates, with the species *Acidovorax facilis* comb. nov., *Acidovorax delafieldii* comb. nov., and *Acidovorax temperans* sp. nov. *Int. J. Syst. Bacteriol.* **40**:384-398.
7. **Carr EL, Kampfer P, Patel BK, Gurtler V, Seviour RJ.** 2003. Seven novel species of *Acinetobacter* isolated from activated sludge. *Int. J. Syst. Evol. Microbiol.* **53**:953-963.
8. **Christensen H, Bisgaard M, Angen O, Olsen JE.** 2002. Final classification of Bisgaard taxon 9 as *Actinobacillus arthritidis* sp. nov. and recognition of a novel genomospecies for equine strains of *Actinobacillus lignieresii*. *Int. J. Syst. Evol. Microbiol.* **52**:1239-1246.
9. **Hall V, Collins MD, Hutson R, Falsen E, Duerden BI.** 2002. *Actinomyces cardiffensis* sp. nov. from human clinical sources. *J Clin Microbiol* **40**:3427-3431.
10. **Jiang Y, Wiese J, Tang SK, Xu LH, Imhoff JF, Jiang CL.** 2008. *Actinomycetospora chiangmaiensis* gen. nov., sp. nov., a new member of the family Pseudonocardiaceae. *Int. J. Syst. Evol. Microbiol.* **58**:408-413.
11. **Kim MK, Park MJ, Im WT, Yang DC.** 2008. *Aeromicrobium ginsengisoli* sp. nov., isolated from a ginseng field. *Int. J. Syst. Evol. Microbiol.* **58**:2025-2030.
12. **Alperi A, Martinez-Murcia AJ, Monera A, Saavedra MJ, Figueras MJ.** 2010. *Aeromonas fluvialis* sp. nov., isolated from a Spanish river. *Int. J. Syst. Evol. Microbiol.* **60**:72-77.
13. **Brenner DJ, Hollis DG, Moss CW, English CK, Hall GS, Vincent J, Radosevic J, Birkness KA, Bibb WF, Quinn FD, et al.** 1991. Proposal of *Afipia* gen.

nov., with *Afipia felis* sp. nov. (formerly the cat scratch disease bacillus), *Afipia clevelandensis* sp. nov. (formerly the Cleveland Clinic Foundation strain), *Afipia broomeae* sp. nov., and three unnamed genospecies. J Clin Microbiol **29**:2450-2460.

14. **Ruger HJ, Hofle MG.** 1992. Marine star-shaped-aggregate-forming bacteria: *Agrobacterium atlanticum* sp. nov.; *Agrobacterium meteori* sp. nov.; *Agrobacterium ferrugineum* sp. nov., nom. rev.; *Agrobacterium gelatinovorum* sp. nov., nom. rev.; and *Agrobacterium stellulatum* sp. nov., nom. rev. Int. J. Syst. Bacteriol. **42**:133-143.
15. **Rautio M, Eerola E, Vaisanen-Tunkelrott ML, Molitoris D, Lawson P, Collins MD, Jousimies-Somer H.** 2003. Reclassification of *Bacteroides putredinis* (Weinberg et al., 1937) in a new genus *Alistipes* gen. nov., as *Alistipes putredinis* comb. nov., and description of *Alistipes finegoldii* sp. nov., from human sources. Syst Appl Microbiol **26**:182-188.
16. **Maszenan AM, Seviour RJ, Patel BK, Rees GN, McDougall BM.** 1997. *Amaricoccus* gen. nov., a gram-negative coccus occurring in regular packages or tetrads, isolated from activated sludge biomass, and descriptions of *Amaricoccus veronensis* sp. nov., *Amaricoccus tamworthensis* sp. nov., *Amaricoccus macauensis* sp. nov., and *Amaricoccus kaplicensis* sp. nov. Int. J. Syst. Bacteriol. **47**:727-734.
17. **McDonald IR, Kampf P, Topp E, Warner KL, Cox MJ, Hancock TL, Miller LG, Larkin MJ, Ducrocq V, Coulter C, Harper DB, Murrell JC, Oremland RS.** 2005. *Aminobacter ciceronei* sp. nov. and *Aminobacter lissarensis* sp. nov., isolated from various terrestrial environments. Int J Syst Evol Microbiol **55**:1827-1832.
18. **Pugin B, Blamey JM, Baxter BK, Wiegel J.** 2012. *Amphibacillus cookii* sp. nov., a facultatively aerobic, spore-forming, moderately halophilic, alkalithermotolerant bacterium. Int J Syst Evol Microbiol **62**:2090-2096.
19. **Lopez-Igual R, Lechno-Yossef S, Fan Q, Herrero A, Flores E, Wolk CP.** 2012. A major facilitator superfamily protein, HepP, is involved in formation of the heterocyst envelope polysaccharide in the cyanobacterium *Anabaena* sp. strain PCC 7120. J Bacteriol **194**:4677-4687.
20. **Strompl C, Tindall BJ, Jarvis GN, Lunsdorf H, Moore ER, Hippe H.** 1999. A re-evaluation of the taxonomy of the genus *Anaerovibrio*, with the reclassification of *Anaerovibrio glycerini* as *Anaerosinus glycerini* gen. nov., comb. nov., and *Anaerovibrio burkinabensis* as *Anaeroarcus burkinensis* [corrig.] gen. nov., comb. nov. Int. J. Syst. Bacteriol. **49**:1861-1872.
21. **Zellner G, Stackebrandt E, Nagel D, Messner P, Weiss N, Winter J.** 1996. *Anaerofilum pentosovorans* gen. nov., sp. nov., and *Anaerofilum agile* sp. nov., two new, strictly anaerobic, mesophilic, acidogenic bacteria from anaerobic bioreactors. Int. J. Syst. Bacteriol. **46**:871-875.
22. **Lawson PA, Song Y, Liu C, Molitoris DR, Vaisanen ML, Collins MD, Finegold SM.** 2004. *Anaerotruncus colihominis* gen. nov., sp. nov., from human faeces. Int. J. Syst. Evol. Microbiol. **54**:413-417.
23. **Pikuta E, Lysenko A, Chuvilskaya N, Mendrock U, Hippe H, Suzina N, Nikitin D, Osipov G, Laurinavichius K.** 2000. *Anoxybacillus pushchinensis* gen.

nov., sp. nov., a novel anaerobic, alkaliphilic, moderately thermophilic bacterium from manure, and description of *Anoxybacillus flavitherms* comb. nov. *Int J Syst Evol Microbiol* **50**:2109-2117.

24. **Kalmbach S, Manz W, Wecke J, Szewzyk U.** 1999. *Aquabacterium* gen. nov., with description of *Aquabacterium citratiphilum* sp. nov., *Aquabacterium parvum* sp. nov. and *Aquabacterium commune* sp. nov., three in situ dominant bacterial species from the Berlin drinking water system. *Int J Syst Bacteriol* **49**:769-777.
25. **Santos P, Pinhal I, Rainey FA, Empadinhas N, Costa J, Fields B, Benson R, Verissimo A, Da Costa MS.** 2003. Gamma-proteobacteria *Aquicella lusitana* gen. nov., sp. nov., and *Aquicella siphonis* sp. nov. infect protozoa and require activated charcoal for growth in laboratory media. *Appl Environ Microbiol* **69**:6533-6540.
26. **Deckert G, Warren PV, Gaasterland T, Young WG, Lenox AL, Graham DE, Overbeek R, Snead MA, Keller M, Aujay M, Huber R, Feldman RA, Short JM, Olsen GJ, Swanson RV.** 1998. The complete genome of the hyperthermophilic bacterium *Aquifex aeolicus*. *Nature* **392**:353-358.
27. **Nikitin DI, Strompl C, Oranskaya MS, Abraham WR.** 2004. Phylogeny of the ring-forming bacterium *Arcicella aquatica* gen. nov., sp. nov. (ex Nikitin et al. 1994), from a freshwater neuston biofilm. *Int. J. Syst. Evol. Microbiol.* **54**:681-684.
28. **Vandamme P, Falsen E, Rossau R, Hoste B, Segers P, Tytgat R, De Ley J.** 1991. Revision of *Campylobacter*, *Helicobacter*, and *Wolinella* taxonomy: emendation of generic descriptions and proposal of *Arcobacter* gen. nov. *Int. J. Syst. Bacteriol.* **41**:88-103.
29. **Gherna RL, Werren JH, William W, Cote R, Woese CR, Mandelco L, Brenner DJ.** 1991. *Arsenophonus nasoniae* gen. nov., sp. nov., the causative agent of the son-killer trait in the parasitic wasp *Nasonia vitripennis*. *Int. J. Syst. Bacteriol.* **41**:563-565.
30. **Irlinger F, Bimet F, Delettre J, Lefevre M, Grimont PA.** 2005. *Arthrobacter bergerei* sp. nov. and *Arthrobacter arilaitensis* sp. nov., novel coryneform species isolated from the surfaces of cheeses. *Int. J. Syst. Evol. Microbiol.* **55**:457-462.
31. **Yamada Y, Katsura K, Kawasaki H, Widyastuti Y, Saono S, Seki T, Uchimura T, Komagata K.** 2000. *Asaia bogorensis* gen. nov., sp. nov., an unusual acetic acid bacterium in the alpha-Proteobacteria. *Int. J. Syst. Evol. Microbiol.* **50**:823-829.
32. **Anderson CR, Dick GJ, Chu ML, Cho JC, Davis RE, Brauer SL, Tebo BM.** 2009. *Aurantimonas manganoxydans*, sp. nov. and *Aurantimonas litoralis*, sp. nov.: Mn(II) oxidizing representatives of a globally distributed clade of alpha-Proteobacteria from the order Rhizobiales. *Geomicrobiol J* **26**:189-198.
33. **Springer N, Ludwig W, Philipp B, Schink B.** 1998. *Azoarcus anaerobius* sp. nov., a resorcinol-degrading, strictly anaerobic, denitrifying bacterium. *Int J Syst Bacteriol* **48**:953-956.
34. **Reinhold-Hurek B, Hurek T.** 2000. Reassessment of the taxonomic structure of the diazotrophic genus *Azoarcus sensu lato* and description of three new genera and new species, *Azovibrio restrictus* gen. nov., sp. nov., *Azospira oryzae* gen. nov., sp. nov. and *Azonexus fungiphilus* gen. nov., sp. nov. *Int. J. Syst. Evol. Microbiol.* **50**:649-659.

35. **Qiu F, Zhang X, Liu L, Sun L, Schumann P, Song W.** 2009. *Bacillus beijingensis* sp. nov. and *Bacillus ginsengi* sp. nov., isolated from ginseng root. Int. J. Syst. Evol. Microbiol. **59**:729-734.
36. **Miyamoto Y, Itoh K.** 2000. *Bacteroides acidifaciens* sp. nov., isolated from the caecum of mice. Int. J. Syst. Evol. Microbiol. **50**:145-148.
37. **Sakamoto M, Lan PT, Benno Y.** 2007. *Barnesiella viscericola* gen. nov., sp. nov., a novel member of the family Porphyromonadaceae isolated from chicken caecum. Int. J. Syst. Evol. Microbiol. **57**:342-346.
38. **Brenner DJ, O'Connor SP, Winkler HH, Steigerwalt AG.** 1993. Proposals to unify the genera *Bartonella* and *Rochalimaea*, with descriptions of *Bartonella quintana* comb. nov., *Bartonella vinsonii* comb. nov., *Bartonella henselae* comb. nov., and *Bartonella elizabethae* comb. nov., and to remove the family Bartonellaceae from the order Rickettsiales. Int. J. Syst. Bacteriol. **43**:777-786.
39. **Stolp H, Starr MP.** 1963. *Bdellovibrio bacteriovorus* Gen. Et Sp. N., a Predatory, Ectoparasitic, and Bacteriolytic Microorganism. Antonie Van Leeuwenhoek **29**:217-248.
40. **Vandamme P, Bernardet JF, Sergers P, Kersters K, Holmes B.** 1994. New perspectives in the classification of the flavobacteria: description of *Chryseobacterium* gen. nov., *Bergeyella* gen. nov., and *Empedobacter* nom. rev. Int. J. Syst. Bacteriol. **44**:827-831.
41. **Biavati B, Scardovi V, Moore WEC.** 1982. Electrophoretic patterns of proteins in the genus *Bifidobacterium* and proposal of four new species. Int. J. Syst. Bacteriol. **32**:358-373.
42. **Urzi C, Salamone P, Schumann P, Rohde M, Stackebrandt E.** 2004. *Blastococcus saxosidens* sp. nov., and emended descriptions of the genus *Blastococcus* Ahrens and Moll 1970 and *Blastococcus aggregatus* Ahrens and Moll 1970. Int. J. Syst. Evol. Microbiol. **54**:253-259.
43. **Hiraishi A, Kuraishi H, Kawahara K.** 2000. Emendation of the description of *Blastomonas natatoria* (Sly 1985) Sly and Cahill 1997 as an aerobic photosynthetic bacterium and reclassification of *Erythromonas ursincola* Yurkov et al. 1997 as *Blastomonas ursincola* comb. nov. Int. J. Syst. Evol. Microbiol. **50**:1113-1118.
44. **Das SK, Mishra AK, Tindall BJ, Rainey FA, Stackebrandt E.** 1996. Oxidation of thiosulfate by a new bacterium, *Bosea thiooxidans* (strain BI-42) gen. nov., sp. nov.: analysis of phylogeny based on chemotaxonomy and 16S ribosomal DNA sequencing. Int. J. Syst. Bacteriol. **46**:981-987.
45. **Park SK, Kim MS, Jung MJ, Nam YD, Park EJ, Roh SW, Bae JW.** *Brachybacterium squillarum* sp. nov., isolated from salt-fermented seafood. Int. J. Syst. Evol. Microbiol. **61**:1118-1122.
46. **Hiraishi A, Shin, Y.K., Sugiyama, J. .** 1995. *Brachymonas denitrificans* gen. nov., sp. nov., an aerobic chemoorganotrophic bacterium which contains rhodoquinones, and evolutionary relationships of rhodoquinone producers to bacterial species with various quinone classes Journal of General and Applied Microbiology **41**:99-117.

47. **Zhang Y, Li Y, Chen WF, Wang E, Sui X, Li Q, Zhou Y, Chen WX.** Bradyrhizobium huanghuaihaiense sp. nov., an effective symbiotic bacterium isolated from soybean (*Glycine max* L.) nodules in Northern (Huang-Huai-Hai) Plain of China. *Int. J. Syst. Evol. Microbiol.*
48. **Denman S, Brady C, Kirk S, Cleenwerck I, Venter S, Coutinho T, De Vos P.** 2011. *Brenneria goodwinii* sp. nov., associated with acute oak decline in the UK. *Int. J. Syst. Evol. Microbiol.* **62**:2451-2456.
49. **Tang SK, Wang Y, Schumann P, Stackebrandt E, Lou K, Jiang CL, Xu LH, Li WJ.** 2008. *Brevibacterium album* sp. nov., a novel actinobacterium isolated from a saline soil in China. *Int. J. Syst. Evol. Microbiol.* **58**:574-577.
50. **Choi JH, Kim MS, Roh SW, Bae JW.** Brevundimonas basaltis sp. nov., isolated from black sand. *Int. J. Syst. Evol. Microbiol.* **60**:1488-1492.
51. **Coenye T, Mahenthiralingam E, Henry D, LiPuma JJ, Laevens S, Gillis M, Speert DP, Vandamme P.** 2001. *Burkholderia ambifaria* sp. nov., a novel member of the *Burkholderia cepacia* complex including biocontrol and cystic fibrosis-related isolates. *Int. J. Syst. Evol. Microbiol.* **51**:1481-1490.
52. **Ogg CD, Patel BK.** 2009. *Caloramator australicus* sp. nov., a thermophilic, anaerobic bacterium from the Great Artesian Basin of Australia. *Int J Syst Evol Microbiol* **59**:95-101.
53. **Franzmann PD, Hopfl P, Weiss N, Tindall BJ.** 1991. Psychrotrophic, lactic acid-producing bacteria from anoxic waters in Ace Lake, Antarctica; *Carnobacterium funditum* sp. nov. and *Carnobacterium alterfunditum* sp. nov. *Arch Microbiol* **156**:255-262.
54. **Lau SK, McNabb A, Woo GK, Hoang L, Fung AM, Chung LM, Woo PC, Yuen KY.** 2007. *Catabacter hongkongensis* gen. nov., sp. nov., isolated from blood cultures of patients from Hong Kong and Canada. *J Clin Microbiol* **45**:395-401.
55. **Poindexter JS.** 1964. Biological Properties and Classification of the *Caulobacter* Group. *Bacteriol Rev* **28**:231-295.
56. **Farmer III JJ, Sheth NK, Hudzinski JA, Rose HD, Asbury MF.** 1983. Bacteremia due to *Cedecea neteri* sp. nov. *J. Clin. Microbiol.* **16**:775-778.
57. **Elberson MA, Malekzadeh F, Yazdi MT, Kameranpour N, Noori-Dalooi MR, Matte MH, Shahamat M, Colwell RR, Sowers KR.** 2000. *Cellulomonas persica* sp. nov. and *Cellulomonas iranensis* sp. nov., mesophilic cellulose-degrading bacteria isolated from forest soils. *Int. J. Syst. Evol. Microbiol.* **50**:993-996.
58. **Yoon JH, Kang SJ, Schumann P, Oh TK.** 2007. *Cellulosimicrobium terreum* sp. nov., isolated from soil. *Int J Syst Evol Microbiol* **57**:2493-2497.
59. **Auling G, Busse HJ, Egli T, Elbanna T, Stackebrandt E.** 1993. Description of the gram-negative, obligately aerobic, nitrilotriacetate (NTA)-utilizing bacteria as *Chelatobacter heintzii*, gen. nov., sp. nov., and *Chelatococcus asaccharovorans*, gen. nov., sp. nov. *Syst. Appl. Microbiol.* **16**:104-112.
60. **Lee HG, An DS, Im WT, Liu QM, Na JR, Cho DH, Jin CW, Lee ST, Yang DC.** 2007. *Chitinophaga ginsengisegetis* sp. nov. and *Chitinophaga ginsengisoli* sp. nov., isolated from soil of a ginseng field in South Korea. *Int. J. Syst. Evol. Microbiol.* **57**:1396-1401.
61. **Billi D, Friedmann EI, Hofer KG, Caiola MG, Ocampo-Friedmann R.** 2000. Ionizing-radiation resistance in the desiccation-tolerant cyanobacterium *Chroococciopsis*. *Appl Environ Microbiol* **66**:1489-1492.



62. **Yoon JH, Kang SJ, Oh TK.** 2007. *Chryseobacterium daeguense* sp. nov., isolated from wastewater of a textile dye works. Int. J. Syst. Evol. Microbiol. **57**:1355-1359.
63. **Brenner DJ, O'Hara CM, Grimont PA, Janda JM, Falsen E, Aldova E, Ageron E, Schindler J, Abbott SL, Steigerwalt AG.** 1999. Biochemical identification of *Citrobacter* species defined by DNA hybridization and description of *Citrobacter gillenii* sp. nov. (formerly *Citrobacter* genomospecies 10) and *Citrobacter murlinae* sp. nov. (formerly *Citrobacter* genomospecies 11). J Clin Microbiol **37**:2619-2624.
64. **Yurkov VV, Krieger S, Stackebrandt E, Beatty JT.** 1999. *Citromicrobium bathyomarimum*, a novel aerobic bacterium isolated from deep-sea hydrothermal vent plume waters that contains photosynthetic pigment-protein complexes. J Bacteriol **181**:4517-4525.
65. **Allen TD, Lawson PA, Collins MD, Falsen E, Tanner RS.** 2006. *Cloacibacterium normanense* gen. nov., sp. nov., a novel bacterium in the family Flavobacteriaceae isolated from municipal wastewater. Int. J. Syst. Evol. Microbiol. **56**:1311-1316.
66. **He YL, Ding YF, Long YQ.** 1991. Two cellulolytic *Clostridium* species: *Clostridium cellulosi* sp. nov. and *Clostridium cellulofermentans* sp. nov. Int. J. Syst. Bacteriol. **41**:306-309.
67. **Yoon MH, Ten LN, Im WT.** 2007. *Cohnella panacarvi* sp. nov., a xylanolytic bacterium isolated from ginseng cultivating soil. J Microbiol Biotechnol **17**:913-918.
68. **Wauters G, De Baere T, Willems A, Falsen E, Vaneechoutte M.** 2003. Description of *Comamonas aquatica* comb. nov. and *Comamonas kerstersii* sp. nov. for two subgroups of *Comamonas terrigena* and emended description of *Comamonas terrigena*. Int. J. Syst. Evol. Microbiol. **53**:859-862.
69. **Kageyama A, Benno Y.** 2000. *Coprobacillus catenaformis* gen. nov., sp. nov., a new genus and species isolated from human feces. Microbiol Immunol **44**:23-28.
70. **Collins MD, Hoyles L, Lawson PA, Falsen E, Robson RL, Foster G.** 1999. Phenotypic and phylogenetic characterization of a new *Corynebacterium* species from dogs: description of *Corynebacterium auriscanis* sp. nov. J Clin Microbiol **37**:3443-3447.
71. **Iversen C, Mullane N, McCardell B, Tall BD, Lehner A, Fanning S, Stephan R, Joosten H.** 2008. *Cronobacter* gen. nov., a new genus to accommodate the biogroups of *Enterobacter sakazakii*, and proposal of *Cronobacter sakazakii* gen. nov., comb. nov., *Cronobacter malonaticus* sp. nov., *Cronobacter turicensis* sp. nov., *Cronobacter muytjensii* sp. nov., *Cronobacter dublinensis* sp. nov., *Cronobacter genomospecies* 1, and of three subspecies, *Cronobacter dublinensis* subsp. dublinensis subsp. nov., *Cronobacter dublinensis* subsp. lausannensis subsp. nov. and *Cronobacter dublinensis* subsp. lactaridi subsp. nov. Int. J. Syst. Evol. Microbiol. **58**:1442-1447.
72. **Tamura T, Hayakawa M, Hatano K.** 1998. A new genus of the order Actinomycetales, Cryptosporangium gen. nov., with descriptions of *Cryptosporangium arvum* sp. nov. and *Cryptosporangium japonicum* sp. nov. Int J Syst Bacteriol **48**:995-1005.
73. **Sato Y, Nishihara H, Yoshida M, Watanabe M, Rondal JD, Concepcion RN, Ohta H.** 2006. *Cupriavidus pinatubonensis* sp. nov. and *Cupriavidus laharis* sp.

nov., novel hydrogen-oxidizing, facultatively chemolithotrophic bacteria isolated from volcanic mudflow deposits from Mt. Pinatubo in the Philippines. *Int. J. Syst. Evol. Microbiol.* **56**:973-978.

74. **Behrendt U, Ulrich A, Schumann P, Naumann D, Suzuki K.** 2002. Diversity of grass-associated Microbacteriaceae isolated from the phyllosphere and litter layer after mulching the sward; polyphasic characterization of *Subtercola pratensis* sp. nov., *Curtobacterium herbarum* sp. nov. and *Plantibacter flavus* gen. nov., sp. nov. *Int. J. Syst. Evol. Microbiol.* **52**:1441-1154.
75. **Ding L, Yokota A.** 2004. Proposals of *Curvibacter gracilis* gen. nov., sp. nov. and *Herbaspirillum putei* sp. nov. for bacterial strains isolated from well water and reclassification of [*Pseudomonas*] *huttiensis*, [*Pseudomonas*] *lanceolata*, [*Aquaspirillum*] *delicatum* and [*Aquaspirillum*] *autotrophicum* as *Herbaspirillum huttiense* comb. nov., *Curvibacter lanceolatus* comb. nov., *Curvibacter delicatus* comb. nov. and *Herbaspirillum autotrophicum* comb. nov. *Int. J. Syst. Evol. Microbiol.* **54**:2223-2230.
76. **Strohl WR, Tait LR.** 1978. *Cytophaga aquatilis* sp. nov., a facultative anaerobe isolated from the gills of freshwater fish. *Int. J. Syst. Bacteriol.* **28**:293-303.
77. **Ferreira AC, Nobre MF, Rainey FA, Silva MT, Wait R, Burghardt J, Chung AP, da Costa MS.** 1997. *Deinococcus geothermalis* sp. nov. and *Deinococcus murrayi* sp. nov., two extremely radiation-resistant and slightly thermophilic species from hot springs. *Int. J. Syst. Bacteriol.* **47**:939-947.
78. **Wen A, Fegan M, Hayward C, Chakraborty S, Sly LI.** 1999. Phylogenetic relationships among members of the Comamonadaceae, and description of *Delftia acidovorans* (den Dooren de Jong 1926 and Tamaoka et al. 1987) gen. nov., comb. nov. *Int. J. Syst. Bacteriol.* **49**:567-576.
79. **Strompl C, Tindall BJ, Lunsdorf H, Wong TY, Moore ER, Hippe H.** 2000. Reclassification of *Clostridium quercicolum* as *Dendrosporobacter quercicolus* gen. nov., comb. nov. *Int J Syst Evol Microbiol* **50**:101-106.
80. **Fahrbach M, Kuever J, Meinke R, Kampf P, Hollender J.** 2006. *Denitratisoma oestradiolicum* gen. nov., sp. nov., a 17beta-oestradiol-degrading, denitrifying betaproteobacterium. *Int. J. Syst. Evol. Microbiol.* **56**:1547-1552.
81. **Pathom-Aree W, Nogi Y, Ward AC, Horikoshi K, Bull AT, Goodfellow M.** 2006. *Dermacoccus barathri* sp. nov. and *Dermacoccus profundus* sp. nov., novel actinomycetes isolated from deep-sea mud of the Mariana Trench. *Int. J. Syst. Evol. Microbiol.* **56**:2303-2307.
82. **Stackebrandt E, Schumann P, Swiderski J, Weiss N.** 1999. Reclassification of *Brevibacterium incertum* (Breed 1953) as *Desemzia incerta* gen. nov., comb. nov. *Int. J. Syst. Bacteriol.* **49**:185-188.
83. **Sun H, Spring S, Lapidus A, Davenport K, Del Rio TG, Tice H, Nolan M, Copeland A, Cheng JF, Lucas S, Tapia R, Goodwin L, Pitluck S, Ivanova N, Pagani I, Mavromatis K, Ovchinnikova G, Pati A, Chen A, Palaniappan K, Hauser L, Chang YJ, Jeffries CD, Detter JC, Han C, Rohde M, Brambilla E, Goker M, Woyke T, Bristow J, Eisen JA, Markowitz V, Hugenholtz P, Kyrpides NC, Klenk HP, Land M.** 2010. Complete genome sequence of *Desulfarculus baarsii* type strain (2st14). *Stand Genomic Sci* **3**:276-284.

84. **Szewzyk RP, N. .** 1987. Complete oxidation of catechol by the strictly anaerobic sulfate-reducing *Desulfobacterium catecholicum* sp. nov. *Arch. Microbiol.* **147**:163-168.
85. **Suzuki D, Ueki A, Amaishi A, Ueki K.** 2007. *Desulfobulbus japonicus* sp. nov., a novel Gram-negative propionate-oxidizing, sulfate-reducing bacterium isolated from an estuarine sediment in Japan. *Int. J. Syst. Evol. Microbiol.* **57**:849-855.
86. **Thevenieau F, Fardeau ML, Ollivier B, Joulian C, Baena S.** 2007. *Desulfomicrobium thermophilum* sp. nov., a novel thermophilic sulphate-reducing bacterium isolated from a terrestrial hot spring in Colombia. *Extremophiles* **11**:295-303.
87. **Rees GN, Patel BK.** 2001. *Desulforegula conservatrix* gen. nov., sp. nov., a long-chain fatty acid-oxidizing, sulfate-reducing bacterium isolated from sediments of a freshwater lake. *Int J Syst Evol Microbiol* **51**:1911-1916.
88. **Rutters H, Sass H, Cypionka H, Rullkotter J.** 2001. Monoalkylether phospholipids in the sulfate-reducing bacteria *Desulfosarcina variabilis* and *Desulforhabdus amnigenus*. *Arch Microbiol* **176**:435-442.
89. **Stackebrandt E, Sproer C, Rainey FA, Burghardt J, Pauker O, Hippe H.** 1997. Phylogenetic analysis of the genus *Desulfotomaculum*: evidence for the misclassification of *Desulfotomaculum guttoideum* and description of *Desulfotomaculum orientis* as *Desulfosporosinus orientis* gen. nov., comb. nov. *Int. J. Syst. Bacteriol.* **47**:1134-1139.
90. **Widdel F, Pfennig N.** 1977. A new anaerobic, sporing, acetate-oxidizing, sulfate-reducing bacterium, *Desulfotomaculum* (emend.) *acetoxidans*. *Arch Microbiol* **112**:119-122.
91. **Campbell LL, Kasprzycki MA, Postgate JR.** 1966. *Desulfovibrio africanus* sp. n., a new dissimiliatory sulfate-reducing bacterium. *J Bacteriol* **92**.
92. **Kaksonen AH, Spring S, Schumann P, Kroppenstedt RM, Puhakka JA.** 2007. *Desulfurispora thermophila* gen. nov., sp. nov., a thermophilic, spore-forming sulfate-reducer isolated from a sulfidogenic fluidized-bed reactor. *Int J Syst Evol Microbiol* **57**:1089-1094.
93. **Verma M, Kumar M, Dadhwal M, Kaur J, Lal R.** 2009. *Devosia albogilva* sp. nov. and *Devosia crocina* sp. nov., isolated from a hexachlorocyclohexane dump site. *Int. J. Syst. Evol. Microbiol.* **59**:795-799.
94. **Duckworth AW, Grant S, Grant WD, Jones BE, Meijer D.** 1998. *Dietzia natronolimnaios* sp. nov., a new member of the genus *Dietzia* isolated from an east African soda lake. *Extremophiles* **2**:359-366.
95. **Xie CH, Yokota A.** 2005. *Dyella japonica* gen. nov., sp. nov., a gamma-proteobacterium isolated from soil. *Int. J. Syst. Evol. Microbiol.* **55**:753-756.
96. **Hofstad T, Olsen I, Eribe ER, Falsen E, Collins MD, Lawson PA.** 2000. *Dysgonomonas* gen. nov. to accommodate *Dysgonomonas gadei* sp. nov., an organism isolated from a human gall bladder, and *Dysgonomonas capnocytophagoides* (formerly CDC group DF-3). *Int. J. Syst. Evol. Microbiol.* **50**:2189-2195.
97. **Kim KK, Kim MK, Lim JH, Park HY, Lee ST.** 2005. Transfer of *Chryseobacterium meningosepticum* and *Chryseobacterium miricola* to *Elizabethkingia* gen.

nov. as *Elizabethkingia meningoseptica* comb. nov. and *Elizabethkingia miricola* comb. nov. Int. J. Syst. Evol. Microbiol. **55**:1287-1293.

98. **Staley JT, Irgens RL, Brenner DJ.** 1987. *Enhydrobacter aerosaccus* gen. nov., sp. nov., a gas-vacuolated, facultatively anaerobic, heterotrophic rod. Int. J. Syst. Bacteriol. **37**:289-291.
99. **Inoue K, Sugiyama K, Kosako Y, Sakazaki R, Yamai S.** 2000. *Enterobacter cowani* sp. nov., a new species of the family Enterobacteriaceae. Curr Microbiol **41**:417-420.
100. **De Vaux A, Laguerre G, Divies C, Prevost H.** 1998. *Enterococcus asini* sp. nov. isolated from the caecum of donkeys (*Equus asinus*). Int. J. Syst. Bacteriol. **48**:383-387.
101. **Hao MV, Brenner DJ, Steigerwalt AG, Kosako Y, Komagata K.** 1990. *Erwinia persicinus*, a new species isolated from plants. Int. J. Syst. Bacteriol. **40**:379-383.
102. **Takahashi T, Fujisawa T, Tamura Y, Suzuki S, Muramatsu M, Sawada T, Benno Y, Mitsuoka T.** 1992. DNA relatedness among *Erysipelothrix rhusiopathiae* strains representing all twenty-three serovars and *Erysipelothrix tonsillarum*. Int. J. Syst. Bacteriol. **42**:469-473.
103. **Farmer III JJ, Brenner DJ, Ewing WH.** 1980. Opposition to Recent Proposals Which Would Reject the Family Name Enterobacteriaceae and Escherichia As Its Type Genus. Int. J. Syst. Bacteriol. **30**:660-673.
104. **Holdeman LV, Cato EP, Moore WEC.** 1971. *Eubacterium contortum* (Prévot) comb. nov.: emendation of description and designation of the type strain. Int. J. Syst. Bacteriol. **21**:304-306.
105. **Chaturvedi P, Shivaji S.** 2006. *Exiguobacterium indicum* sp. nov., a psychrophilic bacterium from the Hamta glacier of the Himalayan mountain ranges of India. Int. J. Syst. Evol. Microbiol. **56**:2765-2770.
106. **Duncan SH, Hold GL, Harmsen HJ, Stewart CS, Flint HJ.** 2002. Growth requirements and fermentation products of *Fusobacterium prausnitzii*, and a proposal to reclassify it as *Faecalibacterium prausnitzii* gen. nov., comb. nov. Int. J. Syst. Evol. Microbiol. **52**:2141-2146.
107. **Yoon MH, Im WT.** 2007. *Flavisolibacter ginsengiterrae* gen. nov., sp. nov. and *Flavisolibacter ginsengisoli* sp. nov., isolated from ginseng cultivating soil. Int J Syst Evol Microbiol **57**:1834-1839.
108. **Yi H, Oh HM, Lee JH, Kim SJ, Chun J.** 2005. *Flavobacterium antarcticum* sp. nov., a novel psychrotolerant bacterium isolated from the Antarctic. Int. J. Syst. Evol. Microbiol. **55**:637-641.
109. **Fujita T, Okamoto M, Kosako Y, Okuhara M.** 1996. *Flexibacter japonensis* sp. nov., a new species that produces a novel inhibitor of human leukocyte elastase isolated from soil. Curr Microbiol **33**:89-93.
110. **Hosoya S, Yokota A.** 2007. Reclassification of *Flexibacter aggregans* (Lewin 1969) Leadbetter 1974 as a later heterotypic synonym of *Flexithrix dorotheae*

- Lewin 1970. Int. J. Syst. Evol. Microbiol. **57**:1086-1088.
111. **Swings J, Gillis M, Kersters K, De Vos P, Gosselé F, De Ley J.** 1980. *Frateuria*, a new genus for "*Acetobacter aurantius*". Int. J. Syst. Bacteriol. **30**:547-556.
112. **Schumann P, Prauser H, Rainey FA, Stackebrandt E, Hirsch P.** 1997. *Friedmanniella antarctica* gen. nov., sp. nov., an LL-diaminopimelic acid-containing actinomycete from Antarctic sandstone. Int. J. Syst. Bacteriol. **47**:278-283.
113. **Dastager SG, Lee JC, Ju YJ, Park DJ, Kim CJ.** 2008. *Frigoribacterium mesophilum* sp. nov., a mesophilic actinobacterium isolated from Bigeum Island, Korea. Int J Syst Evol Microbiol **58**:1869-1872.
114. **Ravot G, Magot M, Fardeau ML, Patel BK, Thomas P, Garcia JL, Ollivier B.** 1999. *Fusibacter paucivorans* gen. nov., sp. nov., an anaerobic, thiosulfate-reducing bacterium from an oil-producing well. Int. J. Syst. Bacteriol. **49**:1141-1147.
115. **Dorsch M, Lovet DN, Bailey GD.** 2001. *Fusobacterium equinum* sp. nov., from the oral cavity of horses. Int. J. Syst. Evol. Microbiol. **51**:1959-1963.
116. **Plugge CM, Balk M, Zoetendal EG, Stams AJ.** 2002. *Gelria glutamica* gen. nov., sp. nov., a thermophilic, obligately syntrophic, glutamate-degrading anaerobe. Int J Syst Evol Microbiol **52**:401-407.
117. **Collins MD, Hutson RA, Falsen E, Sjoden B, Facklam RR.** 1998. *Gemella bergeriae* sp. nov., isolated from human clinical specimens. J Clin Microbiol **36**:1290-1293.
118. **Nazina TN, Lebedeva EV, Poltarauas AB, Tourova TP, Grigoryan AA, Sokolova D, Lysenko AM, Osipov GA.** 2004. *Geobacillus gargensis* sp. nov., a novel thermophile from a hot spring, and the reclassification of *Bacillus vulcani* as *Geobacillus vulcani* comb. nov. Int. J. Syst. Evol. Microbiol. **54**:2019-2024.
119. **Straub KL, Buchholz-Cleven BE.** 2001. *Geobacter bremensis* sp. nov. and *Geobacter pelophilus* sp. nov., two dissimilatory ferric-iron-reducing bacteria. Int. J. Syst. Evol. Microbiol. **51**:1805-1808.
120. **Nie GX, Ming H, Li S, Zhou EM, Cheng J, Yu TT, Zhang J, Feng HG, Tang SK, Li WJ.** 2012. *Geodermatophilus nigrescens* sp. nov., isolated from a dry-hot valley. Antonie Van Leeuwenhoek **101**:811-817.
121. **Mason LM, Claus GW.** 1989. Phenotypic characteristics correlated with deoxyribonucleic acid sequence similarities for three species of *Gluconobacter*: *G. oxydans* (Henneberg 1897) De Ley 1961, *G. frateurii* sp. nov., and *G. asaii* sp. nov. Int. J. Syst. Bacteriol. **39**:174-184.
122. **Kim SB, Brown R, Oldfield C, Gilbert SC, Iliarionov S, Goodfellow M.** 2000. *Gordonia amicalis* sp. nov., a novel dibenzothiophene-desulphurizing actinomycete. Int. J. Syst. Evol. Microbiol. **50**:2031-2036.
123. **Collins MD, Lawson PA.** 2000. The genus *Abiotrophia* (Kawamura et al.) is not monophyletic: proposal of *Granulicatella* gen. nov., *Granulicatella adiacens* comb. nov., *Granulicatella elegans* comb. nov. and *Granulicatella balaenopterae* comb. nov. Int. J. Syst. Evol. Microbiol. **50**:365-369.
124. **Hinz KH, Kunjara C.** 1977. *Haemophilus avium*, a new species from chickens. Int. J. Syst. Bacteriol. **27**:324-329.

125. **Huys G, Cnockaert M, Abbott SL, Janda JM, Vandamme P.** 2010. *Hafnia paralvei* sp. nov., formerly known as *Hafnia alvei* hybridization group 2. Int. J. Syst. Evol. Microbiol. **60**:1725-1728.
126. **Kim MS, Roh SW, Bae JW.** 2010. *Halomonas jeotgali* sp. nov., a new moderate halophilic bacterium isolated from a traditional fermented seafood. J Microbiol **48**:404-410.
127. **Franklin CL, Beckwith CS, Livingston RS, Riley LK, Gibson SV, Besch-Williford CL, Hook RR, Jr.** 1996. Isolation of a novel *Helicobacter* species, *Helicobacter cholecystus* sp. nov., from the gallbladders of Syrian hamsters with cholangiofibrosis and centrilobular pancreatitis. J Clin Microbiol **34**:2952-2958.
128. **Rothballer M, Schmid M, Klein I, Gattinger A, Grundmann S, Hartmann A.** 2006. *Herbaspirillum hiltneri* sp. nov., isolated from surface-sterilized wheat roots. Int. J. Syst. Evol. Microbiol. **56**:1341-1348.
129. **Yoon JH, Kang SJ, Jung SY, Oh TK.** 2007. *Humicoccus flavidus* gen. nov., sp. nov., isolated from soil. Int. J. Syst. Evol. Microbiol. **57**:56-59.
130. **Song L, Dong X.** 2009. *Hydrogenoanaerobacterium saccharovorans* gen. nov., sp. nov., isolated from H<sub>2</sub>-producing UASB granules. Int. J. Syst. Evol. Microbiol. **59**:295-299.
131. **Baik KS, Seong CN, Moon EY, Park YD, Yi H, Chun J.** 2006. *Hymenobacter rigui* sp. nov., isolated from wetland freshwater. Int. J. Syst. Evol. Microbiol. **56**:2189-2192.
132. **McDonald IR, Doronina NV, Trotsenko YA, McAnulla C, Murrell JC.** 2001. *Hyphomicrobium chloromethanicum* sp. nov. and *Methylobacterium chloromethanicum* sp. nov., chloromethane-utilizing bacteria isolated from a polluted environment. Int. J. Syst. Evol. Microbiol. **51**:119-122.
133. **Gupta AK, Dharne MS, Rangrez AY, Verma P, Ghate HV, Rohde M, Patole MS, Shouche YS.** 2011. *Ignatzschineria indica* sp. nov. and *Ignatzschineria ureiclastica* sp. nov., isolated from adult flesh flies (Diptera: Sarcophagidae). Int. J. Syst. Evol. Microbiol. **61**:1360-1369.
134. **Collins MD, Lawson PA, Monasterio R, Falsen E, Sjoden B, Facklam RR.** 1999. *Ignavigranum ruoffiae* sp. nov., isolated from human clinical specimens. Int. J. Syst. Bacteriol. **49**:97-101.
135. **Jung HM, Lee JS, Bae HM, Yi TH, Kim SY, Lee ST, Im WT.** 2011. *Inquilinus ginsengisoli* sp. nov., isolated from soil of a ginseng field. Int. J. Syst. Evol. Microbiol. **61**:201-204.
136. **Collins MD, Hutson RA, Foster G, Falsen E, Weiss N.** 2002. *Isobaculum melis* gen. nov., sp. nov., a *Carnobacterium*-like organism isolated from the intestine of a badger. Int. J. Syst. Evol. Microbiol. **52**:207-210.
137. **Kampfer P, Terenius O, Lindh JM, Faye I.** 2006. *Janibacter anophelis* sp. nov., isolated from the midgut of *Anopheles arabiensis*. Int. J. Syst. Evol. Microbiol. **56**:389-392.
138. **Lincoln SP, Fermor TR, Tindall BJ.** 1999. *Janthinobacterium agaricidamnosum* sp. nov., a soft rot pathogen of *Agaricus bisporus*. Int. J. Syst. Bacteriol.

**49**:1577-1589.

139. **Lee SD.** 2009. *Kineococcus rhizosphaerae* sp. nov., isolated from rhizosphere soil. *Int. J. Syst. Evol. Microbiol.* **59**:2204-2207.
140. **Kudo T, Matsushima K, Itoh T, Sasaki J, Suzuki K.** 1998. Description of four new species of the genus *Kineosporia*: *Kineosporia succinea* sp. nov., *Kineosporia rhizophila* sp. nov., *Kineosporia mikuniensis* sp. nov. and *Kineosporia rhamnosa* sp. nov., isolated from plant samples, and amended description of the genus *Kineosporia*. *Int. J. Syst. Bacteriol.* **48**:1245-1255.
141. **Lawson PA, Malnick H, Collins MD, Shah JJ, Chattaway MA, Bendall R, Hartley JW.** 2005. Description of *Kingella potus* sp. nov., an organism isolated from a wound caused by an animal bite. *J Clin Microbiol* **43**:3526-3529.
142. **Carter JS, Bowden FJ, Bastian I, Myers GM, Sriprakash KS, Kemp DJ.** 1999. Phylogenetic evidence for reclassification of *Calymmatobacterium granulomatis* as *Klebsiella granulomatis* comb. nov. *Int. J. Syst. Bacteriol.* **49**:1695-1700.
143. **Yun JH, Roh SW, Jung MJ, Kim MS, Park EJ, Shin KS, Nam YD, Bae JW.** 2011. *Kocuria salsicia* sp. nov., isolated from salt-fermented seafood. *Int. J. Syst. Evol. Microbiol.* **61**:286-289.
144. **Shaw S, Keddie RM.** 1983. A numerical taxonomic study of the genus *Kurthia* with a revised description of *Kurthia zopfii* and a description of *Kurthia gibsonii* sp. nov. *Syst. Appl. Microbiol.* **4**:253-276.
145. **Lee SD.** 2007. *Labeledella gwakjiensis* gen. nov., sp. nov., a novel actinomycete of the family Microbacteriaceae. *Int J Syst Evol Microbiol* **57**:2498-2502.
146. **Miller JA, Kalyuzhnaya MG, Noyes E, Lara JC, Lidstrom ME, Chistoserdova L.** 2005. *Labrys methylaminiphilus* sp. nov., a novel facultatively methylotrophic bacterium from a freshwater lake sediment. *Int J Syst Evol Microbiol* **55**:1247-1253.
147. **Tong H, Dong X.** 2005. *Lactobacillus concavus* sp. nov., isolated from the walls of a distilled spirit fermenting cellar in China. *Int. J. Syst. Evol. Microbiol.* **55**:2199-2202.
148. **Cai Y, Yang J, Pang H, Kitahara M.** 2011. *Lactococcus fujiensis* sp. nov., a lactic acid bacterium isolated from vegetable matter. *Int. J. Syst. Evol. Microbiol.* **61**:1590-1594.
149. **Okoro CK, Bull AT, Mutreja A, Rong X, Huang Y, Goodfellow M.** 2010. *Lechevalieria atacamensis* sp. nov., *Lechevalieria deserti* sp. nov. and *Lechevalieria roselyniae* sp. nov., isolated from hyperarid soils. *Int J Syst Evol Microbiol* **60**:296-300.
150. **Forrester JD, Adams J, Sawyer RG.** 2012. *Leclercia adecarboxylata* bacteremia in a trauma patient: case report and review of the literature. *Surg Infect (Larchmt)* **13**:63-66.
151. **Luck PC, Jacobs E, Roske I, Schroter-Bobsin U, Dumke R, Gronow S.** 2010. *Legionella dresdenensis* sp. nov., isolated from river water. *Int J Syst Evol Microbiol* **60**:2557-2562.

152. **Pindi PK, Kishore KH, Reddy GS, Shivaji S.** 2009. Description of *Leifsonia kafniensis* sp. nov. and *Leifsonia antarctica* sp. nov. Int. J. Syst. Evol. Microbiol. **59**:1348-1352.
153. **Yassin AF, Rainey FA, Brzezinka H, Jahnke KD, Weissbrodt H, Budzikiewicz H, Stackebrandt E, Schaal KP.** 1995. *Lentzea* gen. nov., a new genus of the order Actinomycetales. Int. J. Syst. Bacteriol. **45**:357-363.
154. **de Araujo ED, Patel J, de Araujo C, Rogers SP, Short SM, Campbell DA, Espie GS.** 2011. Physiological characterization and light response of the CO<sub>2</sub>-concentrating mechanism in the filamentous cyanobacterium *Leptolyngbya* sp. CPCC 696. Photosynth Res **109**:85-101.
155. **Spring S, Kampfer P, Ludwig W, Schleifer KH.** 1996. Polyphasic characterization of the genus *Leptothrix*: new descriptions of *Leptothrix mobilis* sp. nov. and *Leptothrix discophora* sp. nov. nom. rev. and emended description of *Leptothrix cholodnii* emend. Syst Appl Microbiol **19**:634-643.
156. **Eribe ER, Paster BJ, Caugant DA, Dewhirst FE, Stromberg VK, Lacy GH, Olsen I.** 2004. Genetic diversity of *Leptotrichia* and description of *Leptotrichia goodfellowii* sp. nov., *Leptotrichia hofstadii* sp. nov., *Leptotrichia shahii* sp. nov. and *Leptotrichia wadei* sp. nov. Int. J. Syst. Evol. Microbiol. **54**:583-592.
157. **Yun JH, Roh SW, Kim MS, Jung MJ, Park EJ, Shin KS, Nam YD, Bae JW.** 2011. *Leucobacter salsicius* sp. nov., from a salt-fermented food. Int. J. Syst. Evol. Microbiol. **61**:502-506.
158. **Ehrmann MA, Freiding S, Vogel RF.** 2009. *Leuconostoc palmae* sp. nov., a novel lactic acid bacterium isolated from palm wine. Int. J. Syst. Evol. Microbiol. **59**:943-947.
159. **Shiratori H, Ohiwa H, Ikeno H, Ayame S, Kataoka N, Miya A, Beppu T, Ueda K.** 2008. *Lutispora thermophila* gen. nov., sp. nov., a thermophilic, spore-forming bacterium isolated from a thermophilic methanogenic bioreactor digesting municipal solid wastes. Int. J. Syst. Evol. Microbiol. **58**:964-969.
160. **Coorevits A, Dinsdale AE, Heyrman J, Schumann P, Van Landschoot A, Logan NA, De Vos P.** 2012. *Lysinibacillus macroides* sp. nov., nom. rev. Int. J. Syst. Evol. Microbiol. **62**:1121-1127.
161. **Kloos WE, Ballard DN, George CG, Webster JA, Hubner RJ, Ludwig W, Schleifer KH, Fiedler F, Schubert K.** 1998. Delimiting the genus *Staphylococcus* through description of *Macrococcus caseolyticus* gen. nov., comb. nov. and *Macrococcus equipercicus* sp. nov., and *Macrococcus bovicus* sp. no. and *Macrococcus carouelicus* sp. nov. Int. J. Syst. Bacteriol. **48**:859-877.
162. **Lee SD.** 2007. *Marmoricola aequoreus* sp. nov., a novel actinobacterium isolated from marine sediment. Int. J. Syst. Evol. Microbiol. **57**:1391-1395.
163. **Zul D, Wanner G, Overmann J.** 2008. *Massilia brevitalea* sp. nov., a novel betaproteobacterium isolated from lysimeter soil. Int. J. Syst. Evol. Microbiol. **58**:1245-1251.
164. **Rogosa M.** 1971. Transfer of *Peptostreptococcus elsdenii* Gutierrez et al. to a new genus, *Megasphaera* [*M. elsdenii* (Gutierrez et al) comb. nov. Int. J. Syst. Bacteriol. **21**:187-189.



165. **Jarvis BDW, Van Berkum P, Chen WX, Nour SM, Fernandez MP, Cleyet-Marel JC, Gillis M.** 1997. Transfer of *Rhizobium loti*, *Rhizobium huakuii*, *Rhizobium ciceri*, *Rhizobium mediterraneum*, and *Rhizobium tianshanense* to *Mesorhizobium* gen. nov. Int. J. Syst. Bacteriol. **47**:895-898.
166. **Gallego V, Garcia MT, Ventosa A.** 2006. *Methylobacterium adhaesivum* sp. nov., a methylotrophic bacterium isolated from drinking water. Int. J. Syst. Evol. Microbiol. **56**:339-342.
167. **Bodrossy L, Holmes EM, Holmes AJ, Kovacs KL, Murrell JC.** 1997. Analysis of 16S rRNA and methane monooxygenase gene sequences reveals a novel group of thermotolerant and thermophilic methanotrophs, *Methylocaldum* gen. nov. Arch Microbiol **168**:493-503.
168. **Sieburth JM, Johnson PW, Eberhardt MA, Sieracki, M. E., Lidstrom M, Laux D.** 1988. The first methane-oxidizing bacterium from the upper mixing layer of the deep ocean: *Methylomonas pelagica* sp. nov. . Curr. Microbiol. **14**:285-293.
169. **Gogleva AA, Kaparullina EN, Doronina NV, Trotsenko YA.** 2012. *Methylophilus flavus* sp. nov. and *Methylophilus luteus* sp. nov., aerobic, methylotrophic bacteria associated with plants. Int. J. Syst. Evol. Microbiol. **60**:2623-2628.
170. **Kageyama A, Takahashi Y, Omura S.** 2006. *Microbacterium deminutum* sp. nov., *Microbacterium pumilum* sp. nov. and *Microbacterium aoyamense* sp. nov. Int. J. Syst. Evol. Microbiol. **56**:2113-2117.
171. **Wieser M, Denner EB, Kampfer P, Schumann P, Tindall B, Steiner U, Vybiral D, Lubitz W, Maszenan AM, Patel BK, Seviour RJ, Radax C, Busse HJ.** 2002. Emended descriptions of the genus *Micrococcus*, *Micrococcus luteus* (Cohn 1872) and *Micrococcus lylae* (Kloos et al. 1974). Int. J. Syst. Evol. Microbiol. **52**:629-637.
172. **An DS, Im WT, Yoon MH.** 2008. *Microlumatus panaciterrae* sp. nov., a beta-glucosidase-producing bacterium isolated from soil in a ginseng field. Int. J. Syst. Evol. Microbiol. **58**:2734-2738.
173. **Amakata D, Matsuo Y, Shimono K, Park JK, Yun CS, Matsuda H, Yokota A, Kawamukai M.** 2005. *Mitsuaria chitosanitabida* gen. nov., sp. nov., an aerobic, chitinase-producing member of the 'Betaproteobacteria'. Int J Syst Evol Microbiol **55**:1927-1932.
174. **Stock I, Falsen E, Wiedemann B.** 2003. *Moellerella wisconsensis*: identification, natural antibiotic susceptibility and its dependency on the medium applied. Diagn Microbiol Infect Dis **45**:1-11.
175. **Bøvre K.** 1979. Proposal to divide the genus *Moraxella* Lwoff 1939 emend. Henriksen and Bøvre 1968 into two subgenera - subgenus *Moraxella* (Lwoff 1939) Bøvre 1979 and subgenus *Branhamella* (Catlin 1970) Bøvre 1979. Int. J. Syst. Bacteriol. **29**:403-406.
176. **Emborg J, Dalgaard P, Ahrens P.** 2006. *Morganella psychrotolerans* sp. nov., a histamine-producing bacterium isolated from various seafoods. Int. J. Syst. Evol. Microbiol. **56**:2473-2479.
177. **Hennessee CT, Seo JS, Alvarez AM, Li QX.** 2009. Polycyclic aromatic hydrocarbon-degrading species isolated from Hawaiian soils: *Mycobacterium crocinum*

- sp. nov., *Mycobacterium pallens* sp. nov., *Mycobacterium rutilum* sp. nov., *Mycobacterium rufum* sp. nov. and *Mycobacterium aromaticivorans* sp. nov. Int. J. Syst. Evol. Microbiol. **59**:378-387.
178. **Madden DL, Moats KE, London WT, Matthew EB, Sever JL.** 1974. *Mycoplasma moatsii*, a new species isolated from recently imported grivet monkeys (*Cercopithecus aethiops*). Int. J. Syst. Bacteriol. **24**:459-464.
179. **Zhang XY, Zhang YJ, Chen XL, Qin QL, Zhao DL, Li TG, Dang HY, Zhang YZ.** 2008. *Myroides profundus* sp. nov., isolated from deep-sea sediment of the southern Okinawa Trough. FEMS Microbiol Lett **287**:108-112.
180. **Sorokin DY, van Pelt S, Tourova TP, Takaichi S, Muyzer G.** 2007. Acetonitrile degradation under haloalkaline conditions by *Natronocella acetinitrilica* gen. nov., sp. nov. Microbiology **153**:1157-1164.
181. **Vandamme P, Holmes B, Bercovier H, Coenye T.** 2006. Classification of Centers for Disease Control Group Eugonic Fermenter (EF)-4a and EF-4b as *Neisseria animaloris* sp. nov. and *Neisseria zoodegmatis* sp. nov., respectively. Int. J. Syst. Evol. Microbiol. **56**:1801-1805.
182. **Nakagawa S, Takai K, Inagaki F, Horikoshi K, Sako Y.** 2005. *Nitratiraptor tergaricus* gen. nov., sp. nov. and *Nitratifactor salsuginis* gen. nov., sp. nov., nitrate-reducing chemolithoautotrophs of the epsilon-Proteobacteria isolated from a deep-sea hydrothermal system in the Mid-Okinawa Trough. Int. J. Syst. Evol. Microbiol. **55**:925-933.
183. **Yi H, Chun J.** 2004. *Nocardioides aestuarii* sp. nov., isolated from tidal flat sediment. Int. J. Syst. Evol. Microbiol. **54**:2151-2154.
184. **Kampfer P, Busse HJ, Rainey FA.** 2002. *Nocardiopsis compostus* sp. nov., from the atmosphere of a composting facility. Int. J. Syst. Evol. Microbiol. **52**:621-627.
185. **Takeuchi M, Hamana K, Hiraishi A.** 2001. Proposal of the genus *Sphingomonas sensu stricto* and three new genera, *Sphingobium*, *Novosphingobium* and *Sphingopyxis*, on the basis of phylogenetic and chemotaxonomic analyses. Int. J. Syst. Evol. Microbiol. **51**:1405-1417.
186. **Prest AG, Hammond JR, Stewart GS.** 1994. Biochemical and Molecular Characterization of *Obesumbacterium proteus*, a Common Contaminant of Brewing Yeasts. Appl Environ Microbiol **60**:1635-1640.
187. **Ivanova EP, Onyshchenko OM, Christen R, Zhukova NV, Lysenko AM, Shevchenko LS, Buljan V, Hambly B, Kiprianova EA.** 2005. *Oceanimonas smirnovii* sp. nov., a novel organism isolated from the Black Sea. Syst Appl Microbiol **28**:131-136.
188. **Kampfer P, Scholz HC, Huber B, Falsen E, Busse HJ.** 2007. *Ochrobactrum haematophilum* sp. nov. and *Ochrobactrum pseudogrignonense* sp. nov., isolated from human clinical specimens. Int. J. Syst. Evol. Microbiol. **57**:2513-2518.

189. **Hardham JM, King KW, Dreier K, Wong J, Strietzel C, Eversole RR, Sfintescu C, Evans RT.** 2008. Transfer of *Bacteroides splanchnicus* to *Odoribacter* gen. nov. as *Odoribacter splanchnicus* comb. nov., and description of *Odoribacter denticanis* sp. nov., isolated from the crevicular spaces of canine periodontitis patients. *Int. J. Syst. Evol. Microbiol.* **58**:103-109.
190. **Carlier JP, K'Ouas G, Bonne I, Lozniewski A, Mory F.** 2004. *Oribacterium sinus* gen. nov., sp. nov., within the family 'Lachnospiraceae' (phylum Firmicutes). *Int. J. Syst. Evol. Microbiol.* **54**:1611-1615.
191. **Clarke RT.** 1979. Niche in Pasture-Fed Ruminants for the Large Rumen Bacteria Oscillospira, Lampropedia, and Quin's and Eadie's Ovals. *Appl Environ Microbiol* **37**:654-657.
192. **Allison MJ, Dawson KA, Mayberry WR, Foss JG.** 1985. *Oxalobacter formigenes* gen. nov., sp. nov.: oxalate-degrading anaerobes that inhabit the gastrointestinal tract. *Arch Microbiol* **141**:1-7.
193. **Berge O, Guinebretiere MH, Achouak W, Normand P, Heulin T.** 2002. *Paenibacillus graminis* sp. nov. and *Paenibacillus odorifer* sp. nov., isolated from plant roots, soil and food. *Int. J. Syst. Evol. Microbiol.* **52**:607-616.
194. **Ueki A, Akasaka H, Suzuki D, Ueki K.** 2006. *Paludibacter propionigenes* gen. nov., sp. nov., a novel strictly anaerobic, Gram-negative, propionate-producing bacterium isolated from plant residue in irrigated rice-field soil in Japan. *Int. J. Syst. Evol. Microbiol.* **56**:39-44.
195. **Coenye T, Falsen E, Hoste B, Ohlen M, Goris J, Govan JR, Gillis M, Vandamme P.** 2000. Description of *Pandoraea* gen. nov. with *Pandoraea apista* sp. nov., *Pandoraea pulmonicola* sp. nov., *Pandoraea pnomenus* sp. nov., *Pandoraea sputorum* sp. nov. and *Pandoraea norimbergensis* comb. nov. *Int J Syst Evol Microbiol* **50**:887-899.
196. **Gavini F, Mergaert J, Beji A, Mielcarek C, Izard D, Kersters K, De Lay J.** 1989. Transfer of *Enterobacter agglomerans* (Beijerinck 1888) Ewing and Fife 1972 to *Pantoea* gen. nov. as *Pantoea agglomerans* comb. nov. and description of *Pantoea dispersa* sp. nov. *Int. J. Syst. Bacteriol.* **39**:337-345.
197. **Sakamoto M, Benno Y.** 2006. Reclassification of *Bacteroides distasonis*, *Bacteroides goldsteinii* and *Bacteroides merdae* as *Parabacteroides distasonis* gen. nov., comb. nov., *Parabacteroides goldsteinii* comb. nov. and *Parabacteroides merdae* comb. nov. *Int. J. Syst. Evol. Microbiol.* **56**:1599-1605.
198. **Leisner JJ, Vancanneyt M, Goris J, Christensen H, Rusul G.** 2000. Description of *Paralactobacillus selangorensis* gen. nov., sp. nov., a new lactic acid bacterium isolated from chili bo, a Malaysian food ingredient. *Int. J. Syst. Evol. Microbiol.* **50**:19-24.
199. **Reddy GS, Garcia-Pichel F.** 2009. Description of *Patulibacter americanus* sp. nov., isolated from biological soil crusts, emended description of the genus *Patulibacter* Takahashi et al. 2006 and proposal of Solirubrobacterales ord. nov. and Thermoleophilales ord. nov. *Int. J. Syst. Evol. Microbiol.* **59**:87-94.
200. **Nabhan S, De Boer SH, Maiss E, Wydra K.** 2012. *Pectobacterium aroidearum* sp. nov., a soft rot pathogen with preference for monocotyledonous plants. *Int. J. Syst. Evol. Microbiol.* **In press.**

201. **An DS, Kim SG, Ten LN, Cho CH.** 2009. *Pedobacter daechungensis* sp. nov., from freshwater lake sediment in South Korea. *Int. J. Syst. Evol. Microbiol.* **59**:69-72.
202. **Sly LI, Arunpairojana V, Dixon DR.** 1990. Binding of Colloidal MnO(2) by Extracellular Polysaccharides of *Pedomicrobium manganicum*. *Appl Environ Microbiol* **56**:2791-2794.
203. **Xie CH, Yokota A.** 2005. Reclassification of *Alcaligenes latus* strains IAM 12599T and IAM 12664 and *Pseudomonas saccharophila* as *Azohydromonas lata* gen. nov., comb. nov., *Azohydromonas australica* sp. nov. and *Pelomonas saccharophila* gen. nov., comb. nov., respectively. *Int. J. Syst. Evol. Microbiol.* **55**:2419-2425.
204. **Imachi H, Sakai S, Ohashi A, Harada H, Hanada S, Kamagata Y, Sekiguchi Y.** 2007. *Pelotomaculum propionicicum* sp. nov., an anaerobic, mesophilic, obligately syntrophic, propionate-oxidizing bacterium. *Int J Syst Evol Microbiol* **57**:1487-1492.
205. **Song Y, Liu C, Finegold SM.** 2007. *Peptoniphilus gorbachii* sp. nov., *Peptoniphilus olsenii* sp. nov., and *Anaerococcus murdochii* sp. nov. isolated from clinical specimens of human origin. *J Clin Microbiol* **45**:1746-1752.
206. **Downes J, Wade WG.** 2006. *Peptostreptococcus stomatis* sp. nov., isolated from the human oral cavity. *Int. J. Syst. Evol. Microbiol.* **56**:751-754.
207. **Grabowski A, Tindall BJ, Bardin V, Blanchet D, Jeanthon C.** 2005. *Petrimonas sulfuriphila* gen. nov., sp. nov., a mesophilic fermentative bacterium isolated from a biodegraded oil reservoir. *Int J Syst Evol Microbiol* **55**:1113-1121.
208. **Salinas MB, Fardeau ML, Cayol JL, Casalot L, Patel BK, Thomas P, Garcia JL, Ollivier B.** 2004. *Petrobacter succinatimandens* gen. nov., sp. nov., a moderately thermophilic, nitrate-reducing bacterium isolated from an Australian oil well. *Int. J. Syst. Evol. Microbiol.* **54**:645-649.
209. **Boemare NE, Akhurst RJ, Mourant RG.** 1993. DNA relatedness between *Xenorhabdus* spp. (Enterobacteriaceae), symbiotic bacteria of entomopathogenic nematodes, and a proposal to transfer *Xenorhabdus luminescens* to a new genus, *Photorhabdus* gen. nov. *Int. J. Syst. Bacteriol.* **43**:249-255.
210. **Hatayama K, Shoun H, Ueda Y, Nakamura A.** 2005. *Planifilum fimeticola* gen. nov., sp. nov. and *Planifilum fulgidum* sp. nov., novel members of the family 'Thermoactinomycetaceae' isolated from compost. *Int. J. Syst. Evol. Microbiol.* **55**:2101-2104.
211. **Pinevich AV, Averina SG, Gavrilova OV, Migunova AV.** 2008. Baeocytes in the cyanobacterium *Pleurocapsa* sp.: characterization of the differentiated cells produced by multiple fission. *Mikrobiologiya* **77**:71-78.
212. **Hahn MW, Minasyan A, Lang E, Koll U, Sproer C.** 2012. *Polynucleobacter difficilis* sp. nov., a planktonic freshwater bacterium affiliated with subcluster B1 of the genus *Polynucleobacter*. *Int. J. Syst. Evol. Microbiol.* **62**:376-383.
213. **Hwang CY, Cho BC.** 2008. *Ponticoccus litoralis* gen. nov., sp. nov., a marine bacterium in the family Rhodobacteraceae. *Int. J. Syst. Evol. Microbiol.* **58**:1332-1338.

214. **Collins MD, Love DN, Karjalainen J, Kanervo A, Forsblom B, Willems A, Stubbs S, Sarkiala E, Bailey GD, Wigney DI, et al.** 1994. Phylogenetic analysis of members of the genus *Porphyromonas* and description of *Porphyromonas cangingivalis* sp. nov. and *Porphyromonas cansulci* sp. nov. *Int. J. Syst. Bacteriol.* **44**:674-679.
215. **Sakamoto M, Suzuki N, Okamoto M.** 2010. *Prevotella aurantiaca* sp. nov., isolated from the human oral cavity. *Int. J. Syst. Evol. Microbiol.* **60**:500-503.
216. **Bernard KA, Shuttleworth L, Munro C, Forbes-Faulkner JC, Pitt D, Norton JH, Thomas AD.** 2002. *Propionibacterium australiense* sp. nov. derived from granulomatous bovine lesions. *Anaerobe* **8**:41-47.
217. **Tanaka K, Nakamura K, Mikami E.** 1990. Fermentation of maleate by a gram-negative strictly anaerobic non-spore former, *Propionivibrio dicarboxylicus* gen. nov., sp. nov. *Arch. Microbiol.* **154**:323-328.
218. **Staley JT.** 1968. Prosthecomicrobium and Ancalomicrobium: new prosthecate freshwater bacteria. *J Bacteriol* **95**:1921-1942.
219. **Schoenmaker GS, Oltmann LE, Stouthamer AH.** 1979. Purification and properties of the membrane-bound hydrogenase from *Proteus mirabilis*. *Biochim Biophys Acta* **567**:511-521.
220. **Juneja P, Lazzaro BP.** 2009. *Providencia sneebia* sp. nov. and *Providencia burhodogranariea* sp. nov., isolated from wild *Drosophila melanogaster*. *Int. J. Syst. Evol. Microbiol.* **59**:1108-1111.
221. **Manaia CM, Nogales B, Weiss N, Nunes OC.** 2004. *Gulosibacter molinativorax* gen. nov., sp. nov., a molinate-degrading bacterium, and classification of '*Brevibacterium helvolum*' DSM 20419 as *Pseudoclavibacter helvolus* gen. nov., sp. nov. *Int. J. Syst. Evol. Microbiol.* **54**:783-789.
222. **Yumoto I, Yamazaki K, Hishinuma M, Nodasaka Y, Suemori A, Nakajima K, Inoue N, Kawasaki K.** 2001. *Pseudomonas alcaliphila* sp. nov., a novel facultatively psychrophilic alkaliphile isolated from seawater. *Int. J. Syst. Evol. Microbiol.* **51**:349-355.
223. **Lee SB, Strand SE, Stensel HD, Herwig RP.** 2004. *Pseudonocardia chloroethenivorans* sp. nov., a chloroethene-degrading actinomycete. *Int. J. Syst. Evol. Microbiol.* **54**:131-139.
224. **Yoon JH, Yeo SH, Oh TK, Park YH.** 2005. *Psychrobacter alimentarius* sp. nov., isolated from squid jeotgal, a traditional Korean fermented seafood. *Int. J. Syst. Evol. Microbiol.* **55**:171-176.
225. **Maszenan AM, Tay JH, Schumann P, Jiang HL, Tay ST.** 2005. *Quadrisphaera granulorum* gen. nov., sp. nov., a Gram-positive polyphosphate-accumulating coccus in tetrads or aggregates isolated from aerobic granules. *Int. J. Syst. Evol. Microbiol.* **55**:1771-1777.
226. **Brenner DJ, Muller HE, Steigerwalt AG, Whitney AM, O'Hara CM, Kampf P.** 1998. Two new *Rahnella* genomospecies that cannot be phenotypically differentiated from *Rahnella aquatilis*. *Int. J. Syst. Bacteriol.* **48**:141-149.
227. **Coenye T, Goris J, De Vos P, Vandamme P, LiPuma JJ.** 2003. Classification of *Ralstonia pickettii*-like isolates from the environment and clinical samples as

- Ralstonia insidiosa* sp. nov. Int. J. Syst. Evol. Microbiol. **53**:1075-1080.
228. **Dorofeeva LV, Evtushenko LI, Krausova VI, Karpov AV, Subbotin SA, Tiedje JM.** 2002. *Rathayibacter caricis* sp. nov. and *Rathayibacter festucae* sp. nov., isolated from the phyllosphere of *Carex* sp. and the leaf gall induced by the nematode *Anguina graminis* on *Festuca rubra* L., respectively. Int. J. Syst. Evol. Microbiol. **52**:1917-1923.
229. **Wang ET, van Berkum P, Beyene D, Sui XH, Dorado O, Chen WX, Martinez-Romero E.** 1998. *Rhizobium huautlense* sp. nov., a symbiont of *Sesbania herbacea* that has a close phylogenetic relationship with *Rhizobium galegae*. Int. J. Syst. Bacteriol. **48**:687-699.
230. **Kulichevskaya IS, Guzev VS, Gorlenko VM, Liesack W, Dedysh SN.** 2006. *Rhodoblastus sphagnicola* sp. nov., a novel acidophilic purple non-sulfur bacterium from Sphagnum peat bog. Int J Syst Evol Microbiol **56**:1397-1402.
231. **Zhang YQ, Li WJ, Kroppenstedt RM, Kim CJ, Chen GZ, Park DJ, Xu LH, Jiang CL.** 2005. *Rhodococcus yunnanensis* sp. nov., a mesophilic actinobacterium isolated from forest soil. Int. J. Syst. Evol. Microbiol. **55**:1133-1137.
232. **Chakravarthy SK, Ramaprasad EV, Shobha E, Sasikala C, Ramana Ch V.** 2012. *Rhodoplanes piscinae* sp. nov. isolated from pond water. Int J Syst Evol Microbiol **62**:2828-2834.
233. **Ramana VV, Chakravarthy SK, Raj PS, Kumar BV, Shobha E, Ramaprasad EV, Sasikala C, Ramana Ch V.** 2012. Descriptions of *Rhodopseudomonas parapalustris* sp. nov., *Rhodopseudomonas harwoodiae* sp. nov. and *Rhodopseudomonas pseudopalustris* sp. nov., and emended description of *Rhodopseudomonas palustris*. Int J Syst Evol Microbiol **62**:1790-1798.
234. **Nissen H, Dundas ID.** 1984. *Rhodospirillum salinarum* sp. nov., a halophilic photosynthetic bacterium isolated from a Portuguese saltern. Arch. Microbiol. **138**:251-256.
235. **Müller M, Martin M.** 1999. The genome of *Rickettsia prowazekii* and some thoughts on the origin of mitochondria and hydrogenosomes. Bioessays **21**:377-381.
236. **Stanton TB, Savage DC.** 1983. *Roseburia cecicola* gen. nov., sp. nov., a motile, obligately anaerobic bacterium from a mouse cecum. Int. J. Syst. Bacteriol. **33**:618-627.
237. **Georg LK, Brown JM.** 1967. *Rothia*, gen. nov., an aerobic genus of the family Actinomycetaceae. Int. J. Syst. Bacteriol. **17**:79-88.
238. **Denner EB, Kolari M, Hoornstra D, Tsitko I, Kampfer P, Busse HJ, Salkinoja-Salonen M.** 2006. *Rubellimicrobium thermophilum* gen. nov., sp. nov., a red-pigmented, moderately thermophilic bacterium isolated from coloured slime deposits in paper machines. Int. J. Syst. Evol. Microbiol. **56**:1355-1362.
239. **Carreto L, Moore E, Nobre MF, Wait R, Riley PW, Sharp RJ, Da Costa MS.** 1996. *Rubrobacter xylanophilus* sp. nov., a new thermophilic species isolated from a thermally polluted effluent. Int. J. Syst. Bacteriol. **46**:460-465.
240. **Moore WEC, Cato EP, Holdeman LV.** 1972. *Ruminococcus bromii* sp. n. and emendation of the description of *Ruminococcus sijpesteini*. Int. J. Syst. Bacteriol.

22:78-80.

241. **Jojima Y, Mihara Y, Suzuki S, Yokozeki K, Yamanaka S, Fudou R.** 2004. *Saccharibacter floricola* gen. nov., sp. nov., a novel osmophilic acetic acid bacterium isolated from pollen. *Int. J. Syst. Evol. Microbiol.* **54**:2263-2267.
242. **Lu Z, Liu Z, Wang L, Zhang Y, Qi W, Goodfellow M.** 2001. *Saccharopolyspora flava* sp. nov. and *Saccharopolyspora thermophila* sp. nov., novel actinomycetes from soil. *Int J Syst Evol Microbiol* **51**:319-325.
243. **Shelobolina ES, Sullivan SA, O'Neill KR, Nevin KP, Lovley DR.** 2004. Isolation, characterization, and U(VI)-reducing potential of a facultatively anaerobic, acid-resistant Bacterium from Low-pH, nitrate- and U(VI)-contaminated subsurface sediment and description of *Salmonella subterranea* sp. nov. *Appl Environ Microbiol* **70**:2959-2965.
244. **Hong SG, Lee YK, Yim JH, Chun J, Lee HK.** 2008. *Sanguibacter antarcticus* sp. nov., isolated from Antarctic sea sand. *Int. J. Syst. Evol. Microbiol.* **58**:50-52.
245. **Furusawa G, Yoshikawa T, Yasuda A, Sakata T.** 2003. Algicidal activity and gliding motility of *Saprospira* sp. SS98-5. *Can J Microbiol* **49**:92-100.
246. **Elbanna K, Lutke-Eversloh T, Van Trappen S, Mergaert J, Swings J, Steinbuchel A.** 2003. *Schlegelella thermodepolymerans* gen. nov., sp. nov., a novel thermophilic bacterium that degrades poly(3-hydroxybutyrate-co-3-mercaptopropionate). *Int. J. Syst. Evol. Microbiol.* **53**:1165-1168.
247. **Collins MD, Shah HN.** 1986. Reclassification of *Bacteroides termitidis* Sebald (Holdeman and Moore) in a new genus *Sebaldella*, as *Sebaldella termitidis* comb. nov. *Int. J. Syst. Bacteriol.* **36**:349-350.
248. **Breitenstein A, Wiegel J, Haertig C, Weiss N, Andreessen JR, Lechner U.** 2002. Reclassification of *Clostridium hydroxybenzoicum* as *Sedimentibacter hydroxybenzoicus* gen. nov., comb. nov., and description of *Sedimentibacter saalensis* sp. nov. *Int J Syst Evol Microbiol* **52**:801-807.
249. **An DS, Lee HG, Im WT, Liu QM, Lee ST.** 2007. *Segetibacter koreensis* gen. nov., sp. nov., a novel member of the phylum Bacteroidetes, isolated from the soil of a ginseng field in South Korea. *Int. J. Syst. Evol. Microbiol.* **57**:1828-1833.
250. **Yi H, Yoon HI, Chun J.** 2005. *Sejongia antarctica* gen. nov., sp. nov. and *Sejongia jeonii* sp. nov., isolated from the Antarctic. *Int J Syst Evol Microbiol* **55**:409-416.
251. **Grimont PAD, Jackson TA, Ageron E, Noonan MJ.** 1988. *Serratia entomophila* sp. nov., associated with amber disease in the New Zealand grass grub *Costelytra zealandica*. *Int. J. Syst. Bacteriol.* **38**:1-6.
252. **Satomi M, Vogel BF, Venkateswaran K, Gram L.** 2007. Description of *Shewanella glacialipiscicola* sp. nov. and *Shewanella algidipiscicola* sp. nov., isolated from marine fish of the Danish Baltic Sea, and proposal that *Shewanella affinis* is a later heterotypic synonym of *Shewanella colwelliana*. *Int. J. Syst. Evol. Microbiol.* **57**:347-352.
253. **Dale C, Maudlin I.** 1999. *Sodalis* gen. nov. and *Sodalis glossinidius* sp. nov., a microaerophilic secondary endosymbiont of the tsetse fly *Glossina morsitans*

*morsitans*. Int. J. Syst. Bacteriol. **49**:267-275.

254. **Kim MK, Kim YJ, Cho DH, Yi TH, Soung NK, Yang DC.** 2007. *Solimonas soli* gen. nov., sp. nov., isolated from soil of a ginseng field. Int. J. Syst. Evol. Microbiol. **57**:2591-2594.
255. **An DS, Wang L, Kim MS, Bae HM, Lee ST, Im WT.** 2011. *Solirubrobacter ginsenosidimutans* sp. nov., isolated from soil of a ginseng field. Int J Syst Evol Microbiol **61**:2606-2609.
256. **Pradella S, Hans A, Sproer C, Reichenbach H, Gerth K, Beyer S.** 2002. Characterisation, genome size and genetic manipulation of the myxobacterium *Sorangium cellulosum* So ce56. Arch Microbiol **178**:484-492.
257. **Kim KH, Ten LN, Liu QM, Im WT, Lee ST.** 2006. *Sphingobacterium daejeonense* sp. nov., isolated from a compost sample. Int. J. Syst. Evol. Microbiol. **56**:2031-2036.
258. **Lee JS, Shin YK, Yoon JH, Takeuchi M, Pyun YR, Park YH.** 2001. *Sphingomonas aquatilis* sp. nov., *Sphingomonas koreensis* sp. nov., and *Sphingomonas taejonensis* sp. nov., yellow-pigmented bacteria isolated from natural mineral water. Int. J. Syst. Evol. Microbiol. **51**:1491-1498.
259. **Pikuta EV, Hoover RB, Bej AK, Marsic D, Whitman WB, Krader P.** 2009. *Spirochaeta dissipatitropha* sp. nov., an alkaliphilic, obligately anaerobic bacterium, and emended description of the genus *Spirochaeta* Ehrenberg 1835. Int J Syst Evol Microbiol **59**:1798-1804.
260. **Hackett KJ, Whitcomb RF, French FE, Tully JG, Gasparich GE, Rose DL, Carle P, Bove JM, Henegar RB, Clark TB, Konai M, Clark EA, Williamson DL.** 1996. *Spiroplasma corruscae* sp. nov., from a firefly beetle (Coleoptera: Lampyridae) and tabanid flies (Diptera: Tabanidae). Int. J. Syst. Bacteriol. **46**:947-950.
261. **Finster KW, Herbert RA, Lomstein BA.** 2009. *Spirosoma spitsbergense* sp. nov. and *Spirosoma luteum* sp. nov., isolated from a high Arctic permafrost soil, and emended description of the genus *Spirosoma*. Int. J. Syst. Evol. Microbiol. **59**:839-844.
262. **Tamura T, Hayakawa M, Hatano K.** 1999. *Sporichthya brevicatena* sp. nov. Int. J. Syst. Bacteriol. **49**:1779-1784.
263. **Grech-Mora I, Fardeau ML, Patel BKC, Ollivier B, Rimbault A, Prensier G, Garcia JL, Garnier-Sillam E.** 1996. Isolation and characterization of *Sporobacter termitidis* gen. nov., sp. nov., from the digestive tract of the wood-feeding termite *Nasutitermes lujae*. Int. J. Syst. Bacteriol. **46**:512-518.
264. **Boga HI, Ludwig W, Brune A.** 2003. *Sporomusa aerivorans* sp. nov., an oxygen-reducing homoacetogenic bacterium from the gut of a soil-feeding termite. Int. J. Syst. Evol. Microbiol. **53**:1397-1404.
265. **Yoon JH, Lee KC, Weiss N, Kho YH, Kang KH, Park YH.** 2001. *Sporosarcina aquimarina* sp. nov., a bacterium isolated from seawater in Korea, and transfer of *Bacillus globisporus* (Larkin and Stokes 1967), *Bacillus psychrophilus* (Nakamura 1984) and *Bacillus pasteurii* (Chester 1898) to the genus *Sporosarcina* as *Sporosarcina globispora* comb. nov., *Sporosarcina psychrophila* comb. nov. and *Sporosarcina pasteurii* comb. nov., and emended description of th. Int. J. Syst.



Evol. Microbiol. **51**:1079-1086.

266. **Kloos WE, Schleifer KH.** 1975. Isolation and characterization of staphylococci from human skin. II. Description of four new species: *Staphylococcus warneri*, *Staphylococcus capitis*, *Staphylococcus hominis*, and *Staphylococcus simulans*. Int. J. Syst. Bacteriol. **25**:62-79.
267. **Assih EA, Ouattara AS, Thierry S, Cayol JL, Labat M, Macarie H.** 2002. *Stenotrophomonas acidaminiphila* sp. nov., a strictly aerobic bacterium isolated from an upflow anaerobic sludge blanket (UASB) reactor. Int. J. Syst. Evol. Microbiol. **52**:559-568.
268. **Willcox MD, Zhu H, Knox KW.** 2001. *Streptococcus australis* sp. nov., a novel oral streptococcus. Int. J. Syst. Evol. Microbiol. **51**:1277-1281.
269. **Liu Z, Shi Y, Zhang Y, Zhou Z, Lu Z, Li W, Huang Y, Rodriguez C, Goodfellow M.** 2005. Classification of *Streptomyces griseus* (Krainsky 1914) Waksman and Henrici 1948 and related species and the transfer of '*Microstreptospora cinerea*' to the genus *Streptomyces* as *Streptomyces yanii* sp. nov. Int. J. Syst. Evol. Microbiol. **55**:1605-1610.
270. **Janssen PH, O'Farrell KA.** 1999. *Succinispira mobilis* gen. nov., sp. nov., a succinate-decarboxylating anaerobic bacterium. Int. J. Syst. Bacteriol. **49**:1009-1013.
271. **Finster K, Liesack W, Tindall BJ.** 1997. *Sulfurospirillum arcachonense* sp. nov., a new microaerophilic sulfur-reducing bacterium. Int. J. Syst. Bacteriol. **47**:1212-1217.
272. **Chadha A, Pandey DC.** 1981. Observations on a new species of *Symphyonemopsis* Tiwari & Mitra, viz. *S. Pantii* n. sp. (Cyanophyta, Stigonematales). Hydrobiologia **77**:109-215.
273. **Kumazawa S, Yumura S, Yoshisuji H.** 2001. Photoautotrophic growth of a recently isolated N<sub>2</sub>-fixing marine non-heterocystous filamentous cyanobacterium, *Symploca* sp. (Cyanobacteria). J. Phycol. **37**:482-487.
274. **Huang TC, Lin RF, Chu MK, Chen HM.** 1999. Organization and expression of nitrogen-fixation genes in the aerobic nitrogen-fixing unicellular cyanobacterium *Synechococcus* sp. strain RF-1. Microbiology **145** (7):743-753.
275. **Sousa DZ, Smidt H, Alves MM, Stams AJ.** 2007. *Syntrophomonas zehnderi* sp. nov., an anaerobe that degrades long-chain fatty acids in co-culture with *Methanobacterium formicicum*. Int. J. Syst. Evol. Microbiol. **57**:609-615.
276. **Sizova MV, Panikov NS, Spiridonova EM, Slobodova NV, Tourova TP.** 2007. Novel facultative anaerobic acidotolerant *Telmatospirillum siberiense* gen. nov. sp. nov. isolated from mesotrophic fen. Syst Appl Microbiol **30**:213-220.
277. **Slobodkin AI, Tourova TP, Kostrikina NA, Lysenko AM, German KE, Bonch-Osmolovskaya EA, Birkeland NK.** 2006. *Tepidimicrobium ferriphilum* gen. nov., sp. nov., a novel moderately thermophilic, Fe(III)-reducing bacterium of the order Clostridiales. Int. J. Syst. Evol. Microbiol. **56**:369-372.
278. **Xie CH, Yokota A.** 2006. Reclassification of [*Flavobacterium*] *ferrugineum* as *Terrimonas ferruginea* gen. nov., comb. nov., and description of *Terrimonas lutea*

sp. nov., isolated from soil. Int. J. Syst. Evol. Microbiol. **56**:1117-1121.

279. **Macy JM, Rech S, Auling G, Dorsch M, Stackebrandt E, Sly LI.** 1993. *Thauera selenatis* gen. nov., sp. nov., a member of the beta subclass of Proteobacteria with a novel type of anaerobic respiration. Int J Syst Bacteriol **43**:135-142.
280. **Baena S, Fardeau ML, Woo TH, Ollivier B, Labat M, Patel BK.** 1999. Phylogenetic relationships of three amino-acid-utilizing anaerobes, *Selenomonas acidaminovorans*, '*Selenomonas acidaminophila*' and *Eubacterium acidaminophilum*, as inferred from partial 16S rDNA nucleotide sequences and proposal of *Thermanaerovibrio acidaminovorans* gen. nov., comb. nov. and *Anaeromusa acidaminophila* gen. nov., comb. nov. Int. J. Syst. Bacteriol. **49**:969-974.
281. **Gossner AS, Devereux R, Ohnemuller N, Acker G, Stackebrandt E, Drake HL.** 1999. *Thermicanus aegyptius* gen. nov., sp. nov., isolated from oxic soil, a fermentative microaerophile that grows commensally with the thermophilic acetogen *Moorella thermoacetica*. Appl Environ Microbiol **65**:5124-5133.
282. **Sokolova TG, Kostrikina NA, Chernyh NA, Kolganova TV, Tourova TP, Bonch-Osmolovskaya EA.** 2005. *Thermincola carboxydiphila* gen. nov., sp. nov., a novel anaerobic, carboxydotrophic, hydrogenogenic bacterium from a hot spring of the Lake Baikal area. Int. J. Syst. Evol. Microbiol. **55**:2069-2073.
283. **Wagner ID, Zhao W, Zhang CL, Romanek CS, Rohde M, Wiegel J.** 2008. *Thermoanaerobacter uzonensis* sp. nov., an anaerobic thermophilic bacterium isolated from a hot spring within the Uzon Caldera, Kamchatka, Far East Russia. Int. J. Syst. Evol. Microbiol. **58**:2565-2573.
284. **Mori K, Kim H, Kakegawa T, Hanada S.** 2003. A novel lineage of sulfate-reducing microorganisms: *Thermodesulfobiaceae* fam. nov., *Thermodesulfobium narugense*, gen. nov., sp. nov., a new thermophilic isolate from a hot spring. Extremophiles **7**:283-290.
285. **Mergaert J, Cnockaert MC, Swings J.** 2003. *Thermomonas fusca* sp. nov. and *Thermomonas brevis* sp. nov., two mesophilic species isolated from a denitrification reactor with poly(epsilon-caprolactone) plastic granules as fixed bed, and emended description of the genus *Thermomonas*. Int. J. Syst. Evol. Microbiol. **53**:1961-1966.
286. **Sorokin DY, Tourova TP, Sjollema KA, Kuenen JG.** 2003. *Thialkalivibrio nitratireducens* sp. nov., a nitrate-reducing member of an autotrophic denitrifying consortium from a soda lake. Int. J. Syst. Evol. Microbiol. **53**:1779-1783.
287. **Kumar AP, Srinivas TN, Thiel V, Tank M, Sasikala C, Ramana Ch V, Imhoff JF.** 2009. *Thiohalocapsa marina* sp. nov., from an Indian marine aquaculture pond. Int. J. Syst. Evol. Microbiol. **59**:2333-2338.
288. **Howarth R, Unz RF, Seviour EM, Seviour RJ, Blackall LL, Pickup RW, Jones JG, Yaguchi J, Head IM.** 1999. Phylogenetic relationships of filamentous sulfur bacteria (*Thiothrix* spp. and Eikelboom type 021N bacteria) isolated from wastewater-treatment plants and description of *Thiothrix eikelboomii* sp. nov., *Thiothrix unzii* sp. nov., *Thiothrix fructosivorans* sp. nov. and *Thiothrix defluvii* sp. nov. Int. J. Syst. Bacteriol. **49**:1817-1827.
289. **Graber JR, Leadbetter JR, Breznak JA.** 2004. Description of *Treponema azotonutricium* sp. nov. and *Treponema primitia* sp. nov., the first spirochetes isolated from termite guts. Appl Environ Microbiol **70**:1315-1320.

290. **Collins MD, Smida J, Dorsch M, Stackebrandt E.** 1988. *Tsukamurella* gen. nov. harboring *Corynebacterium paurometabolum* and *Rhodococcus aurantiacus*. Int. J. Syst. Bacteriol. **38**:385-391.
291. **Lawson PA, Falsen E, Cotta MA, Whitehead TR.** 2007. *Vagococcus elongatus* sp. nov., isolated from a swine-manure storage pit. Int. J. Syst. Evol. Microbiol. **57**:751-754.
292. **Yoon JH, Kang SJ, Oh TK.** 2006. *Variovorax dokdonensis* sp. nov., isolated from soil. Int J Syst Evol Microbiol **56**:811-814.
293. **Mays TD, Holdeman LV, Moore WEC, Rogosa M, Johnson JL.** 1982. Taxonomy of the genus *Veillonella* Prévot. Int. J. Syst. Bacteriol. **32**:28-36.
294. **De Bruyne K, Camu N, Lefebvre K, De Vuyst L, Vandamme P.** 2008. *Weissella ghanensis* sp. nov., isolated from a Ghanaian cocoa fermentation. Int. J. Syst. Evol. Microbiol. **58**:2721-2725.
295. **Kampfer P, Andersson MA, Rainey FA, Kroppenstedt RM, Salkinoja-Salonen M.** 1999. *Williamsia muralis* gen. nov., sp. nov., isolated from the indoor environment of a children's day care centre. Int J Syst Bacteriol **49**:681-687.
296. **Rasgon JL, Gamston CE, Ren X.** 2006. Survival of *Wolbachia pipientis* in cell-free medium. Appl Environ Microbiol **72**:6934-6937.
297. **Swings J, Van den Mooter M, Vauterin L, Hoste B, Gillis M, New TW, Kersters K.** 1990. Reclassification of the causal agents of bacterial blight (*Xanthomonas campestris* pv. *oryzae*) and bacterial leaf streak (*Xanthomonas campestris* pv. *oryzicola*) of rice as pathovars of *Xanthomonas oryzae* (ex Ishiyama 1922) sp. nov., nom. rev. . Int. J. Syst. Bacteriol. **40**:309-311.
298. **Wauters G, Janssens M, Steigerwalt AG, Brenner DJ.** 1988. *Yersinia mollaretii* sp. nov. and *Yersinia bercovieri* sp. nov., formerly called *Yersinia enterocolitica* biogroups 3A and 3B. Int. J. Syst. Bacteriol. **38**:424-429.
299. **Shao Y, Chung BS, Lee SS, Park W, Lee SS, Jeon CO.** 2009. *Zoogloea caeni* sp. nov., a floc-forming bacterium isolated from activated sludge. Int J Syst Evol Microbiol **59**:526-530.
300. **Yi H, Chang YH, Oh HW, Bae KS, Chun J.** 2003. *Zooshikella ganhwensis* gen. nov., sp. nov., isolated from tidal flat sediments. Int J Syst Evol Microbiol **53**:1013-1018.
301. **Okamoto T, Taguchi H, Nakamura K, Ikenaga H, Kuraishi H, Yamasato K.** 1993. *Zymobacter palmae* gen. nov., sp. nov., a new ethanol-fermenting peritrichous bacterium isolated from palm sap. Arch Microbiol **160**:333-337.
